# Supplementary material for: Negative, Null and Beneficial Effects of Drinking Water on Energy Intake, Energy Expenditure, Fat Oxidation and Weight Change in Randomized Trials: A Qualitative Review
Source: Nutrients. 2016 Jan 2;8(1):19. doi: 10.3390/nu8010019 (PMC4728633; doi:10.3390/nu8010019)
Supplement: Supplementary file 1 [file nutrients-08-00019-s001.xlsx]

## Sheet: Key to terms & abbreviations
Appendix for: Negative, Null, and Beneficial Effects of Drinking Water on Energy Intake, Energy Expenditure, Fat Oxidation, and Weight Change in Randomized Trials: A Qualitative Review Jodi JD Stookey
Term or Abbreviation
Absolute	The study tested the effect of an absolute increase in volume of water consumed
Ad-libitum diet condition	Participants were offered ad-libitum foods during the test meal
EI	Energy intake
F	Female
Grey-highlight	Studies that did not involve plain water. Studies that are highlighted grey involve a placebo test drink, water plus non-caloric sweetener, flavor or color
High exercise intensity	VO2 Max greater than 70%
Higher	Drinking water resulted in a higher value than the reference category
Lower	Drinking water resulted in a lower value than the reference category
M	Male
Meal	Test meal (foods only, beverages not included)
N	Normal weight (BMI: 18.5–24.9)
O	Overweight and/or obese (BMI>=25.0)
Plain water	Plain drinking water, including tap, still, sparkling, carbonated or mineral water; exluding beverages with added flavor, color or texture
R	Restricted diet or restrained eater (e.g. score >=11 on Eating Habits Questionnaire, Herman CP, Polivy J. Restrained eating. In: AJ Stunkard ed Obesity. Philadelphia PA: WB Saunders & Co, 1980: 208–25.)
Relative	The study tested the effect of drinking water instead of the reference category, holding volume constant
Same	Drinking water resulted in the same value as reference category
UR	Study participants were not consciously restricting their diet and/or were not restrained eaters
Higher FV	Higher fruit and/or vegetable intake
Higher PA	Higher physical activity

## Sheet: Energy intake
Appendix for: Negative, Null, and Beneficial Effects of Drinking Water on Energy Intake, Energy Expenditure, Fat Oxidation, and Weight Change in Randomized Trials: A Qualitative Review
Reference	Plain water	Outcome	Drinking water effect	Drinking water exposure	Reference drink	Drink volume	Diet condition	Exercise intensity	Age	Male	Female	Weight status	Restricted eater
Shah, M.; Copeland, J.; Dart, L.; Adams-Huet, B.; James, A.; Rhea, D. Slower eating speed lowers energy intake in normal-weight but not overweight/obese subjects. J. Acad. Nutr. Diet. 2014, 114, 393–402.	1	Meal EI	Lower	Absolute	256ml	324ml	Ad-libitum	Rest	19–65 years	M	F	N	UR
Andrade, A.M.; Kresge, D.L.; Teixeira, P.J.; Baptista, F.; Melanson, K.J. Does eating slowly influence appetite and energy intake when water intake is controlled? Int. J. Behav. Nutr. Phys. Act. 2012, doi:10.1186/1479-5868-9-135.	1	Meal EI	Lower	Absolute	290ml	410ml	Ad-libitum	Rest	20–30 years		F	N	UR, R
Van Walleghen, E.L.; Orr, J.S.; Gentile, C.L.; Davy, B.M. Pre-meal water consumption reduces meal energy intake in older but not younger subjects. Obesity 2007, 15, 93–99.	1	Meal EI	Lower	Absolute	No beverage	375-500ml	Ad-libitum	Rest	60–80 years	M	F	N & O	UR
Davy, B.M.; Dennis, E.A.; Dengo, A.L.; Wilson, K.L.; Davy, K.P. Water consumption reduces energy intake at a breakfast meal in obese older adults. J. Am. Diet. Assoc. 2008, 108, 1236–1239.	1	Meal EI	Lower	Absolute	No beverage	500ml	Ad-libitum	Rest	55–75 years	M	F	O	UR
Dennis, E.A.; Dengo, A.L.; Comber, D.L.; et al. Water consumption increases weight loss during a hypocaloric diet intervention in middle aged and older adults. Obesity 2010, 18, 300–307.	1	Meal EI	Lower	Absolute	No beverage	500ml	Ad-libitum	Rest	55–75 years	M	F	O	UR
Appleton, K.M.; Blundell, J.E. Habitual high and low consumers of artificially-sweetened beverages: effects of sweet taste and energy on short-term appetite. Physiol. Behav. 2007, 92, 479–486.	1	Snack, evening	Lower	Relative	Artificially sweetened drink	330ml	Ad-libitum	Usual day	Adult		F	N & O	LASB
Appleton KM, Blundell JE. Habitual high and low consumers of artificially-sweetened beverages: effects of sweet taste and energy on short-term appetite. Physiol & Behav 2007; 92: 479-486.	1	Snack am	Lower	Relative	Artificially sweetened drink	330ml	Ad-libitum	Usual day	Adult		F	N & O	LASB
Appleton, K.M.; Blundell, J.E. Habitual high and low consumers of artificially-sweetened beverages: effects of sweet taste and energy on short-term appetite. Physiol. Behav. 2007, 92, 479–486.	1	Lunch	Lower	Relative	Artificially sweetened drink	330ml	Ad-libitum	Usual day	Adult		F	N & O	LASB
Appleton, K.M.; Blundell, J.E. Habitual high and low consumers of artificially-sweetened beverages: effects of sweet taste and energy on short-term appetite. Physiol. Behav. 2007, 92, 479–486.	1	Day EI	Lower	Relative	Artificially sweetened drink	330ml	Ad-libitum	Usual day	Adult		F	N & O	LASB
King NA, Appleton K, Rogers PJ, Blundell JE. Effects of sweetness and energy in drinks on food intake following exercise. Physiol Behav 1999;66:375-9.	1	Preload+Meal EI	Lower	Relative	Aspartame-Acesulfame	750ml	Ad-libitum	Rest after exercise	21 years	M		N & O	UR
Westerterp-plantenga, M.S.; Verwegen, C.R.T. The appetizing effect of an aperitif in overweight and normal weight humans. Am. J. Clin. Nutr. 1999, 69, 205–212.	1	Preload+Meal EI, 30min	Lower	Relative	Beer	340ml	Ad-libitum	Rest	19–45 years	M		N & O	UR
Westerterp-plantenga, M.S.; Verwegen, C.R.T. The appetizing effect of an aperitif in overweight and normal weight humans. Am. J. Clin. Nutr. 1999, 69, 205–212.	1	Preload+Meal EI, 30min	Lower	Relative	Beer	340ml	Ad-libitum	Rest	19–45 years		F	N & O	UR
Westerterp-plantenga, M.S.; Verwegen, C.R.T. The appetizing effect of an aperitif in overweight and normal weight humans. Am. J. Clin. Nutr. 1999, 69, 205–212.	1	Day EI	Lower	Relative	Beer	340ml	Ad-libitum	Usual	19–45 years	M		N & O	UR
Holt, S.H.; Sandona, N.; Brand-Miller, J.C.The effects of sugar-free vs sugar-rich beverages on feelings of fullness and subsequent food intake. Int. J. Food. Sci. Nutr. 2000 , 51, 59–71.	1	Snack EI	Lower	Relative	Cola	375ml	Ad-libitum	Rest	19–30 years	M		N	UR
Maersk, M.; Belza, A.; Holst, J.J.; Fenger-Grøn, M.; Pedersen, S.B.; Astrup, A.; Richelsen, B. Satiety scores and satiety hormone response after sucrose-sweetened soft drink compared with isocaloric semi-skimmed milk and with non-caloric soft drink: a controlled trial. Eur. J. Clin. Nutr. 2012, 66, 523–529.	1	Preload+Meal EI, 4 hs	Lower	Relative	Cola	500ml	Ad-libitum	Rest	20–50 years		F	O
Della Valle DM, Roe LS, Rolls BJ. Does the consumption of caloric and non-caloric beverages with a meal affect energy intake? Appetite 2005;44:187–193.	1	Preload+Meal EI	Lower	Relative	Cola	360ml	Ad-libitum	Rest	20–56 years		F	N & O	UR
Flood, J.E.; Roe, L.S.; Rolls, B.J. The effect of increased beverage portion size on energy intake at a meal. J. Am. Dietetic. Assoc. 2006, 106,1984–1990.	1	Preload+Meal EI	Lower	Relative	Cola	360ml	Ad-libitum	Rest	18–45 years	M	F	N & O	UR
Flood, J.E.; Roe, L.S.; Rolls, B.J. The effect of increased beverage portion size on energy intake at a meal. J. Am. Dietetic. Assoc. 2006, 106,1984–1990.	1	Preload+Meal EI	Lower	Relative	Cola	540ml	Ad-libitum	Rest	18–45 years	M	F	N & O	UR
Almiron-roig, E, Drewnowski A. Hunger, thirst and energy intakes following consumption of caloric beverages. Physiol Behav 2003;79:767-73.	1	Preload+Meal EI	Lower	Relative	Cola	590ml	Ad-libitum	Rest	18–35 years	M	F	N	UR
Rodin J. Comparative effects of fructose, aspartame, glucose and water preloads on calorie and macronutrient intake. Am J Clin Nutr 1990; 51:428-35.	1	Preload+Meal EI, 60min	Lower	Relative	Glucose	500ml	Ad-libitum	Rest	22–50 years	M	F	N & O	UR
Spitzer L, Rodin J. Effects of fructose and glucose preloads on subsequent food intake. Appetite 1987; 8:135-145.	1	Meal EI, 135min	Lower	Relative	Glucose	500ml	Ad-libitum	Rest	Adult	M		O	UR
Spitzer L, Rodin J. Effects of fructose and glucose preloads on subsequent food intake. Appetite 1987; 8:135-145.	1	Meal EI, 135min	Lower	Relative	Glucose	500ml	Ad-libitum	Rest	Adult		F	O	UR
Spitzer L, Rodin J. Effects of fructose and glucose preloads on subsequent food intake. Appetite 1987; 8:135-145.	1	Meal EI, 135min	Lower	Relative	Glucose + aspartame	500ml	Ad-libitum	Rest	Adult	M		O
Spitzer L, Rodin J. Effects of fructose and glucose preloads on subsequent food intake. Appetite 1987; 8:135-145.	1	Meal EI, 135min	Lower	Relative	Glucose + aspartame	500ml	Ad-libitum	Rest	Adult		F	O
Akhavan T, Anderson GH. Effects of glucose-to-fructose ratios in solutions on subjective satiety, food intake, and satiety hormones in young men. Am J Clin Nutr. 2007 Nov;86(5):1354-63.	1	Preload+Meal EI	Lower	Relative	Glucose + Fructose	300ml	Ad-libitum	Rest	18–35 years	M		N	UR
Akhavan T, Anderson GH. Effects of glucose-to-fructose ratios in solutions on subjective satiety, food intake, and satiety hormones in young men. Am J Clin Nutr. 2007 Nov;86(5):1354-63.	1	Preload+Meal EI	Lower	Relative	High fructose corn syrup	300ml	Ad-libitum	Rest	18–35 years	M		N	UR
Panahi S, Luhovyy BL, Liu TT, Akhavan T, El Khoury D, Goff HD, Anderson GH. Energy and macronutrient content of familiar beverages interact with pre-meal intervals to determine later food intake, appetite and glycemic response in young adults. Appetite. 2013 Jan;60(1):154-61.	1	Preload+Meal EI, 30 min	Lower	Relative	Infant formula	500ml	Ad-libitum	Rest	20–30 years	M	F	N	UR
Panahi S, Luhovyy BL, Liu TT, Akhavan T, El Khoury D, Goff HD, Anderson GH. Energy and macronutrient content of familiar beverages interact with pre-meal intervals to determine later food intake, appetite and glycemic response in young adults. Appetite. 2013 Jan;60(1):154-61.	1	Preload+Meal EI, 120 min	Lower	Relative	Infant formula	500ml	Ad-libitum	Rest	20–30 years	M	F	N	UR
Westerterp-plantenga MS, Verwegen CRT. The appetizing effect of an aperitif in overweight and normal weight humans. Am J Clin Nutr 1999;69:205-12.	1	Preload+Meal EI, 30min	Lower	Relative	Juice fruit, plus cream	340ml	Ad-libitum	Rest	19–45 years	M		N & O	UR
Westerterp-plantenga MS, Verwegen CRT. The appetizing effect of an aperitif in overweight and normal weight humans. Am J Clin Nutr 1999;69:205-12.	1	Preload+Meal EI, 30min	Lower	Relative	Juice fruit, plus cream	340ml	Ad-libitum	Rest	19–45 years		F	N & O	UR
Westerterp-plantenga MS, Verwegen CRT. The appetizing effect of an aperitif in overweight and normal weight humans. Am J Clin Nutr 1999;69:205-12.	1	Preload+Meal EI, 30min	Lower	Relative	juice fruit, plus protein	340ml	Ad-libitum	Rest	19–45 years		F	N & O	UR
Westerterp-plantenga MS, Verwegen CRT. The appetizing effect of an aperitif in overweight and normal weight humans. Am J Clin Nutr 1999;69:205-12.	1	Preload+Meal EI, 30min	Lower	Relative	Juice grape	340ml	Ad-libitum	Rest	19–45 years	M		N & O	UR
Westerterp-plantenga MS, Verwegen CRT. The appetizing effect of an aperitif in overweight and normal weight humans. Am J Clin Nutr 1999;69:205-12.	1	Preload+Meal EI, 30min	Lower	Relative	Juice grape	340ml	Ad-libitum	Rest	19–45 years		F	N & O	UR
Chungchunlam SM, Moughan PJ, Henare SJ, Ganesh S. Effect of time of consumption of preloads on measures of satiety in healthy normal weight women. Appetite 2012; 59(2):281-8.	1	Preload+Meal EI	Lower	Relative	Maltodextrin	350ml	Ad-libitum	Rest	18–40 years		F	N	UR
Della Valle DM, Roe LS, Rolls BJ. Does the consumption of caloric and non-caloric beverages with a meal affect energy intake? Appetite 2005;44:187-93.	1	Preload+Meal EI	Lower	Relative	Milk	360ml	Ad-libitum	Rest	20–56 years		F	N & O	UR
Hagg A, Jacobson T, Nordlund G, Rossner S. Effects of milk or water on lunch intake in preschool children. Appetite 1998;31:83-92.	1	Preload+Meal EI	Lower	Relative	Milk	50ml	Ad-libitum	Rest	4–6 years	M	F	N
Almiron-roig E, Drewnowski A. Hunger, thirst and energy intakes following consumption of caloric beverages. Physiol Behav 2003;79:767-73.	1	Preload+Meal EI	Lower	Relative	Milk	590ml	Ad-libitum	Rest	18–35 years	M	F	N	UR
Panahi S, Luhovyy BL, Liu TT, Akhavan T, El Khoury D, Goff HD, Anderson GH. Energy and macronutrient content of familiar beverages interact with pre-meal intervals to determine later food intake, appetite and glycemic response in young adults. Appetite. 2013 Jan;60(1):154-61.	1	Preload+Meal EI, 30 min	Lower	Relative	Milk 2%	500ml	Ad-libitum	Rest	20–30 years	M	F	N	UR
Panahi S, Luhovyy BL, Liu TT, Akhavan T, El Khoury D, Goff HD, Anderson GH. Energy and macronutrient content of familiar beverages interact with pre-meal intervals to determine later food intake, appetite and glycemic response in young adults. Appetite. 2013 Jan;60(1):154-61.	1	Preload+Meal EI, 120 min	Lower	Relative	Milk 2%	500ml	Ad-libitum	Rest	20–30 years	M	F	N	UR
Panahi S, Luhovyy BL, Liu TT, Akhavan T, El Khoury D, Goff HD, Anderson GH. Energy and macronutrient content of familiar beverages interact with pre-meal intervals to determine later food intake, appetite and glycemic response in young adults. Appetite. 2013 Jan;60(1):154-61.	1	Preload+Meal EI, 30 min	Lower	Relative	Milk, 1% chocolate	500ml	Ad-libitum	Rest	20–30 years	M	F	N	UR
Panahi S, Luhovyy BL, Liu TT, Akhavan T, El Khoury D, Goff HD, Anderson GH. Energy and macronutrient content of familiar beverages interact with pre-meal intervals to determine later food intake, appetite and glycemic response in young adults. Appetite. 2013 Jan;60(1):154-61.	1	Preload+Meal EI, 120 min	Lower	Relative	Milk, 1% chocolate	500ml	Ad-libitum	Rest	20–30 years	M	F	N	UR
Maersk M, Belza A, Holst JJ, Fenger-Grøn M, Pedersen SB, Astrup A, Richelsen B. Satiety scores and satiety hormone response after sucrose-sweetened soft drink compared with isocaloric semi-skimmed milk and with non-caloric soft drink: a controlled trial. Eur J Clin Nutr. 2012 Apr;66(4):523-9. doi: 10.1038/ejcn.2011.223. Epub 2012 Jan 18.	1	Preload+Meal EI, 4 hs	Lower	Relative	Milk, semi-skimmed	500ml	Ad-libitum	Rest	20–50 years		F	O
Cecil JE, Palmer CNA, Wrieden W, et al. Energy intakes of children after preloads: adjustment, not compensation. Am J Clin Nutr 2005;82:302-8.	1	Preload+Meal EI, 90min	Lower	Relative	Orange drink 1628 kJ	250ml	Ad-libitum	Usual classroom	6–7 years	M	F	N & O
Cecil JE, Palmer CNA, Wrieden W, et al. Energy intakes of children after preloads: adjustment, not compensation. Am J Clin Nutr 2005;82:302-8.	1	Preload+Meal EI, 90min	Lower	Relative	Orange drink 1628 kJ	250ml	Ad-libitum	Usual classroom	8–9 years	M	F	N & O
Cecil JE, Palmer CNA, Wrieden W, et al. Energy intakes of children after preloads: adjustment, not compensation. Am J Clin Nutr 2005;82:302-8.	1	Preload+Meal EI, 90min	Lower	Relative	Orange drink 783 kJ	250ml	Ad-libitum	Usual classroom	6–7 years	M	F	N & O
Cecil JE, Palmer CNA, Wrieden W, et al. Energy intakes of children after preloads: adjustment, not compensation. Am J Clin Nutr 2005;82:302-8.	1	Preload+Meal EI, 90min	Lower	Relative	Orange drink 783 kJ	250ml	Ad-libitum	Usual classroom	8–9 years	M	F	N & O
Panahi S, Luhovyy BL, Liu TT, Akhavan T, El Khoury D, Goff HD, Anderson GH. Energy and macronutrient content of familiar beverages interact with pre-meal intervals to determine later food intake, appetite and glycemic response in young adults. Appetite. 2013 Jan;60(1):154-61.	1	Preload+Meal EI, 120 min	Lower	Relative	Orange juice	500ml	Ad-libitum	Rest	20–30 years	M	F	N	UR
Della Valle DM, Roe LS, Rolls BJ. Does the consumption of caloric and non-caloric beverages with a meal affect energy intake? Appetite 2005;44:187-93.	1	Preload+Meal EI	Lower	Relative	Orange juice	360ml	Ad-libitum	Rest	20–56 years		F	N & O	UR
Almiron-roig E, Drewnowski A. Hunger, thirst and energy intakes following consumption of caloric beverages. Physiol Behav 2003;79:767-73.	1	Preload+Meal EI	Lower	Relative	Orange juice	590ml	Ad-libitum	Rest	18–35 years	M	F	N	UR
Panahi S, Luhovyy BL, Liu TT, Akhavan T, El Khoury D, Goff HD, Anderson GH. Energy and macronutrient content of familiar beverages interact with pre-meal intervals to determine later food intake, appetite and glycemic response in young adults. Appetite. 2013 Jan;60(1):154-61.	1	Preload+Meal EI, 30 min	Lower	Relative	Soy	500ml	Ad-libitum	Rest	20–30 years	M	F	N	UR
Panahi S, Luhovyy BL, Liu TT, Akhavan T, El Khoury D, Goff HD, Anderson GH. Energy and macronutrient content of familiar beverages interact with pre-meal intervals to determine later food intake, appetite and glycemic response in young adults. Appetite. 2013 Jan;60(1):154-61.	1	Preload+Meal EI, 120 min	Lower	Relative	Soy	500ml	Ad-libitum	Rest	20–30 years	M	F	N	UR
Lavin JH, French SJ, Ruxton CHS, Read NW. An investigation of the role of oro-sensory stimulation in sugar satiety. Int J Obesity 2002; 26:384-388.	1	Preload+Meal EI	Lower	Relative	Sucrose	150ml	Ad-libitum	Rest	Adult	M	F	N & O	UR
King NA, Appleton K, Rogers PJ, Blundell JE. Effects of sweetness and energy in drinks on food intake following exercise. Physiol Behav 1999;66:375-9.	1	Preload+Meal EI	Lower	Relative	Sucrose	750ml	Ad-libitum	Rest after exercise	21 years	M		N & O	UR
Rolls BJ, Kim S, Fedoroff IC. Effects of drinks sweetened with sucrose or aspartame on hunger, thirst and food intake in men. Physiol Behav 1990; 48(1):19-26.	1	Preload+Meal EI, 60min	Lower	Relative	Sucrose lemonade	16oz	Ad-libitum	Rest	Adult	M	F	N & O	UR
Rolls BJ, Kim S, Fedoroff IC. Effects of drinks sweetened with sucrose or aspartame on hunger, thirst and food intake in men. Physiol Behav 1990; 48(1):19-26.	1	Preload+Meal EI, 60min	Lower	Relative	Sucrose lemonade	8oz	Ad-libitum	Rest	Adult	M	F	N & O	UR
Rolls BJ, Kim S, Fedoroff IC. Effects of drinks sweetened with sucrose or aspartame on hunger, thirst and food intake in men. Physiol Behav 1990; 48(1):19-26.	1	Preload+Meal EI, 30min	Lower	Relative	Sucrose lemonade	16oz	Ad-libitum	Rest	Adult	M	F	N & O	UR
Rolls BJ, Kim S, Fedoroff IC. Effects of drinks sweetened with sucrose or aspartame on hunger, thirst and food intake in men. Physiol Behav 1990; 48(1):19-26.	1	Preload+Meal EI, 30min	Lower	Relative	Sucrose lemonade	8oz	Ad-libitum	Rest	Adult	M	F	N & O	UR
Chungchunlam SM, Moughan PJ, Henare SJ, Ganesh S. Effect of time of consumption of preloads on measures of satiety in healthy normal weight women. Appetite 2012; 59(2):281-8.	1	Preload+Meal EI	Lower	Relative	Whey	350ml	Ad-libitum	Rest	18–40 years		F	N	UR
Westerterp-plantenga MS, Verwegen CRT. The appetizing effect of an aperitif in overweight and normal weight humans. Am J Clin Nutr 1999;69:205-12.	1	Preload+Meal EI, 30min	Lower	Relative	Wine	340ml	Ad-libitum	Rest	19–45 years	M		N & O	UR
Westerterp-plantenga MS, Verwegen CRT. The appetizing effect of an aperitif in overweight and normal weight humans. Am J Clin Nutr 1999;69:205-12.	1	Preload+Meal EI, 30min	Lower	Relative	Wine	340ml	Ad-libitum	Rest	19–45 years		F	N & O	UR
Westerterp-plantenga MS, Verwegen CRT. The appetizing effect of an aperitif in overweight and normal weight humans. Am J Clin Nutr 1999;69:205-12.	1	Day EI	Lower	Relative	Wine	340ml	Ad-libitum	Usual	19–45 years	M		N & O	UR
Black RM, Tanaka P, Leiter LA, Anderson GH. Soft drinks with aspartame: effect on subjective hunger, food selection, and food intake of young adult males. Physiol & Behav 1991; 49: 803-810.	1	Meal EI, 60 min	Same	Abs & Rel	Aspartame soft drink	560ml	Ad-libitum	Rest	19–25 years	M		N & O
68. Shah, M.; Copeland, J.; Dart, L.; Adams-Huet, B.; James, A.; Rhea, D. Slower eating speed lowers energy intake in normal-weight but not overweight/obese subjects. J. Acad. Nutr. Diet. 2014, 114, 393–402.	1	Meal EI	Same	Absolute	270ml	358ml	Ad-libitum	Rest	19–65 years	M	F	O	UR
Black RM, Leiter LA, Anderson GH. Consuming aspartame with and without taste: differential effects on appetite and food intake of young adult males. Physiol & Behav 1993; 53:459-466.	1	Meal EI, 60 min	Same	Absolute	280ml	560ml	Ad-libitum	Rest	19–25 years	M		N	UR, R
Triana AJ, Apanius V, Richmond C, Castellanos VH.Restricting fluid intake during a single meal did not affect food intake in older adults. Appetite. 2003 Aug;41(1):79-86.	1	Meal EI	Same	Absolute	40% usual intake	1	Ad-libitum	Rest, uosm<700 mmol/kg	61–95 years	M	F	N & O	UR
Triana AJ, Apanius V, Richmond C, Castellanos VH.Restricting fluid intake during a single meal did not affect food intake in older adults. Appetite. 2003 Aug;41(1):79-86.	1	Meal EI	Same	Absolute	40% usual intake	1	Ad-libitum	Rest, uosm>700 mmol/kg	61–95 years	M	F	N & O	UR
Rolls BJ, Kim S, Fedoroff IC. Effects of drinks sweetened with sucrose or aspartame on hunger, thirst and food intake in men. Physiol Behav 1990; 48(1):19-26.	1	Preload+Meal EI, 60min	Same	Absolute	No beverage	16 oz	Ad-libitum	Rest	21–39 years	M		N	UR
Rolls BJ, Kim S, Fedoroff IC. Effects of drinks sweetened with sucrose or aspartame on hunger, thirst and food intake in men. Physiol Behav 1990; 48(1):19-26.	1	Preload+Meal EI, 60min	Same	Absolute	No beverage	8oz	Ad-libitum	Rest	21–39 years	M		N	UR
Rolls BJ, Kim S, Fedoroff IC. Effects of drinks sweetened with sucrose or aspartame on hunger, thirst and food intake in men. Physiol Behav 1990; 48(1):19-26.	1	Preload+Meal EI, 30min	Same	Absolute	No beverage	16 oz	Ad-libitum	Rest	21–39 years	M		N	UR
Westerterp-plantenga MS, Verwegen CRT. The appetizing effect of an aperitif in overweight and normal weight humans. Am J Clin Nutr 1999;69:205-12.	1	Preload+Meal EI, 30min	Same	Absolute	No beverage	340ml	Ad-libitum	Rest	19–45 years	M		N & O	UR
Westerterp-plantenga MS, Verwegen CRT. The appetizing effect of an aperitif in overweight and normal weight humans. Am J Clin Nutr 1999;69:205-12.	1	Preload+Meal EI, 30min	Same	Absolute	No beverage	340ml	Ad-libitum	Rest	19–45 years		F	N & O	UR
Rolls BJ, Kim S, Fedoroff IC. Effects of drinks sweetened with sucrose or aspartame on hunger, thirst and food intake in men. Physiol Behav 1990; 48(1):19-26.	1	Preload+Meal EI, 30min	Same	Absolute	No beverage	8oz	Ad-libitum	Rest	21–39 years	M		N	UR
Della Valle DM, Roe LS, Rolls BJ. Does the consumption of caloric and non-caloric beverages with a meal affect energy intake? Appetite 2005;44:187-93.	1	Preload+Meal EI	Same	Absolute	No beverage	360ml	Ad-libitum	Rest	20–56 years		F	N & O	UR
Westerterp-plantenga MS, Verwegen CRT. The appetizing effect of an aperitif in overweight and normal weight humans. Am J Clin Nutr 1999;69:205-12.	1	Meal EI, 30min	Same	Absolute	No beverage	340ml	Ad-libitum	Rest	19–45 years	M		N & O	UR
Westerterp-plantenga MS, Verwegen CRT. The appetizing effect of an aperitif in overweight and normal weight humans. Am J Clin Nutr 1999;69:205-12.	1	Meal EI, 30min	Same	Absolute	No beverage	340ml	Ad-libitum	Rest	19–45 years		F	N & O	UR
Rolls BJ, Bell EA, Thorwart ML. Water incorporated into a food but not served with a food decreases energy intake in lean women. Am J Clin Nutr. 1999 Oct;70(4):448-55.	1	Meal EI	Same	Absolute	No beverage	356ml	Ad-libitum	Rest	20–45 years		F	N	UR
[75]	1	Meal EI	Same	Absolute	No beverage	375-500ml	Ad-libitum	Rest	21–35 years	M	F	N & O	UR
Dennis EA, Dengo AL, Comber DL, et al. Water consumption increases weight loss during a hypocaloric diet intervention in middle aged and older adults. Obesity (Silver Spring, Md 2009;epub.	1	Meal EI	Same	Absolute	No beverage	500ml	Ad-libitum	Rest	55–75 years	M	F	O	UR
Akhavan T, Luhovyy BL, Anderson GH.Effect of drinking compared with eating sugars or whey protein on short-term appetite and food intake. Int J Obes (Lond). 2011 Apr;35(4):562-9. doi: 10.1038/ijo.2010.163. Epub 2010 Aug 24	1	Preload+Meal EI 60min	Same	Relative	Acid whey	300ml	Ad-libitum	Rest	19–28 years	M		N	UR
Akhavan T, Luhovyy BL, Anderson GH.Effect of drinking compared with eating sugars or whey protein on short-term appetite and food intake. Int J Obes (Lond). 2011 Apr;35(4):562-9. doi: 10.1038/ijo.2010.163. Epub 2010 Aug 24	1	Preload+Meal EI 60min	Same	Relative	Acid whey liquid		Ad-libitum	Rest	19–28 years	M		N	UR
Rogers PJ, Carlyle J, Hill AJ, Blundell JE. Uncoupling sweet taste and calories: comparison of the effects of glucose and three intense sweeteners on hunger and food intake. Physiol & Behav 1988; 43: 547-552.	1	Meal EI, 60 min	Same	Relative	Art. Aspartame	200ml	Ad-libitum	Rest	19–25 years	M	F	N	UR
Rogers PJ, Carlyle J, Hill AJ, Blundell JE. Uncoupling sweet taste and calories: comparison of the effects of glucose and three intense sweeteners on hunger and food intake. Physiol & Behav 1988; 43: 547-552.	1	Meal EI, 60 min	Same	Relative	Art. Acesulfame-K	200ml	Ad-libitum	Rest	19–25 years	M	F	N	UR
Appleton KM, Blundell JE. Habitual high and low consumers of artificially-sweetened beverages: effects of sweet taste and energy on short-term appetite. Physiol & Behav 2007; 92: 479-486.	1	Lunch	Same	Relative	Art. Artificially sweetened drink	330ml	Ad-libitum	Usual day	Adult		F	N & O	HASB
Appleton KM, Blundell JE. Habitual high and low consumers of artificially-sweetened beverages: effects of sweet taste and energy on short-term appetite. Physiol & Behav 2007; 92: 479-486.	1	Dinner	Same	Relative	Art. Artificially sweetened drink	330ml	Ad-libitum	Usual day	Adult		F	N & O	HASB
Appleton KM, Blundell JE. Habitual high and low consumers of artificially-sweetened beverages: effects of sweet taste and energy on short-term appetite. Physiol & Behav 2007; 92: 479-486.	1	Dinner	Same	Relative	Art. Artificially sweetened drink	330ml	Ad-libitum	Usual day	Adult		F	N & O	LASB
Appleton KM, Blundell JE. Habitual high and low consumers of artificially-sweetened beverages: effects of sweet taste and energy on short-term appetite. Physiol & Behav 2007; 92: 479-486.	1	Day EI	Same	Relative	Art. Artificially sweetened drink	350ml	Ad-libitum	Usual day	Adult		F	N & O	HASB
Lavin JH, French SA, Read NW. The effect of sucrose- and aspartame-sweetened drinks on energy intake, hunger and food choice of female, moderately restrained eaters. Int J Obes Relat Metab Disord 1997;21:37-42	1	Preload+Meal EI	Same	Relative	Art. Aspartame	330ml	Ad-libitum	Usual	Adult		F	N & O	R
Canty DJ, Chan MM. Effects of consumption of caloric vs noncaloric sweet drinks on indices of hunger and food consumption in normal adults. Am J Clin Nutr 1991;53:1159-64.	1	Meal EI, 60 min	Same	Relative	Art. Aspartame	200ml	Ad-libitum	Rest	23–37 years	M	F	N	UR
Birch LL, McPhee L, Sullivan S. Children's food intake following drinks sweetened with sucrose or aspartame: time course effects. Physiol Behav. 1989 Feb;45(2):387-95.	1	Meal EI, 60 min	Same	Relative	Art. Aspartame	205ml	Ad-libitum	Usual classroom	2–5 years	M	F	N & O
Birch LL, McPhee L, Sullivan S. Children's food intake following drinks sweetened with sucrose or aspartame: time course effects. Physiol Behav. 1989 Feb;45(2):387-95.	1	Meal EI, 0 min	Same	Relative	Art. Aspartame	205ml	Ad-libitum	Rest	2–5 years	M	F	N & O
Lavin JH, French SA, Read NW. The effect of sucrose- and aspartame-sweetened drinks on energy intake, hunger and food choice of female, moderately restrained eaters. Int J Obes Relat Metab Disord 1997;21:37-42	1	Meal EI	Same	Relative	Art. Aspartame	330ml	Ad-libitum	Usual	Adult		F	N & O	R
Rolls BJ, Kim S, Fedoroff IC. Effects of drinks sweetened with sucrose or aspartame on hunger, thirst and food intake in men. Physiol Behav 1990; 48(1):19-26.	1	Preload+Meal EI, 60min	Same	Relative	Art. Aspartame drink	16 oz	Ad-libitum	Rest	22–50 years	M	F	N & O	UR
Rodin J. Comparative effects of fructose, aspartame, glucose and water preloads on calorie and macronutrient intake. Am J Clin Nutr 1990; 51:428-35.	1	Preload+Meal EI, 60min	Same	Relative	Art. Aspartame drink	500ml	Ad-libitum	Rest	22–50 years	M	F	N & O	UR
Rolls BJ, Kim S, Fedoroff IC. Effects of drinks sweetened with sucrose or aspartame on hunger, thirst and food intake in men. Physiol Behav 1990; 48(1):19-26.	1	Preload+Meal EI, 60min	Same	Relative	Art. Aspartame drink	8oz	Ad-libitum	Rest	22–50 years	M	F	N & O	UR
Rolls BJ, Kim S, Fedoroff IC. Effects of drinks sweetened with sucrose or aspartame on hunger, thirst and food intake in men. Physiol Behav 1990; 48(1):19-26.	1	Preload+Meal EI, 30min	Same	Relative	Art. Aspartame drink	16 oz	Ad-libitum	Rest	22–50 years	M	F	N & O	UR
Rolls BJ, Kim S, Fedoroff IC. Effects of drinks sweetened with sucrose or aspartame on hunger, thirst and food intake in men. Physiol Behav 1990; 48(1):19-26.	1	Preload+Meal EI, 30min	Same	Relative	Art. Aspartame drink	8oz	Ad-libitum	Rest	22–50 years	M	F	N & O	UR
Rodin J. Comparative effects of fructose, aspartame, glucose and water preloads on calorie and macronutrient intake. Am J Clin Nutr 1990; 51:428-35.	1	Meal EI, 60 min	Same	Relative	Art. Aspartame drink	500ml	Ad-libitum	Rest	22–50 years	M	F	N & O	UR
Rogers PJ, Fleming HC, Blundell JE. Aspartame ingested without tasting inhibits hunger and food intake. Physiol & Behav, 1990; 47:1239-1243	1	Meal EI	Same	Relative	Art. Aspartame drink	200ml	Ad-libitum	Rest	18–26 years	M	F	N	UR
Maersk M, Belza A, Holst JJ, Fenger-Grøn M, Pedersen SB, Astrup A, Richelsen B. Satiety scores and satiety hormone response after sucrose-sweetened soft drink compared with isocaloric semi-skimmed milk and with non-caloric soft drink: a controlled trial. Eur J Clin Nutr. 2012 Apr;66(4):523-9. doi: 10.1038/ejcn.2011.223. Epub 2012 Jan 18.	1	Preload+Meal EI, 4 hs	Same	Relative	Art. Aspartame soft drink	500ml	Ad-libitum	Rest	20–50 years		F	O
Maersk M, Belza A, Holst JJ, Fenger-Grøn M, Pedersen SB, Astrup A, Richelsen B. Satiety scores and satiety hormone response after sucrose-sweetened soft drink compared with isocaloric semi-skimmed milk and with non-caloric soft drink: a controlled trial. Eur J Clin Nutr. 2012 Apr;66(4):523-9. doi: 10.1038/ejcn.2011.223. Epub 2012 Jan 18.	1	Meal EI, 4 hs	Same	Relative	Art. Aspartame soft drink	500ml	Ad-libitum	Rest	20–50 years		F	O
Black RM, Tanaka P, Leiter LA, Anderson GH. Soft drinks with aspartame: effect on subjective hunger, food selection, and food intake of young adult males. Physiol & Behav 1991; 49: 803-810.	1	Meal EI, 60 min	Same	Relative	Art. Aspartame soft drink, 10min	280ml	Ad-libitum	Rest	19–25 years	M		N & O
Black RM, Tanaka P, Leiter LA, Anderson GH. Soft drinks with aspartame: effect on subjective hunger, food selection, and food intake of young adult males. Physiol & Behav 1991; 49: 803-810.	1	Meal EI, 60 min	Same	Relative	Art. Aspartame soft drink, 2min	280ml	Ad-libitum	Rest	19–25 years	M		N & O
Black RM, Leiter LA, Anderson GH. Consuming aspartame with and without taste: differential effects on appetite and food intake of young adult males. Physiol & Behav 1993; 53:459-466.	1	Meal EI, 60 min	Same	Relative	Art. Aspartame sweetened water	280ml	Ad-libitum	Rest	19–25 years	M		N	UR, R
Holt SH, Sandona N, Brand-Miller JC.The effects of sugar-free vs sugar-rich beverages on feelings of fullness and subsequent food intake. Int J Food Sci Nutr. 2000 Jan;51(1):59-71.	1	Snack EI	Same	Relative	Art. Diet cola	375ml	Ad-libitum	Rest	19–30 years	M		N	UR
Della Valle DM, Roe LS, Rolls BJ. Does the consumption of caloric and non-caloric beverages with a meal affect energy intake? Appetite 2005;44:187-93.	1	Preload+Meal EI	Same	Relative	Art. Diet cola	360ml	Ad-libitum	Rest	20–56 years		F	N & O	UR
Flood JE, Roe LS, Rolls BJ. The effect of increased beverage portion size on energy intake at a meal. J Am Dietetic Assoc 2006;106:1984-90.	1	Preload+Meal EI	Same	Relative	Art. Diet cola	360ml	Ad-libitum	Rest	18–45 years	M	F	N & O	UR
Flood JE, Roe LS, Rolls BJ. The effect of increased beverage portion size on energy intake at a meal. J Am Dietetic Assoc 2006;106:1984-90.	1	Preload+Meal EI	Same	Relative	Art. Diet cola	540ml	Ad-libitum	Rest	18–45 years	M	F	N & O	UR
Flood JE, Roe LS, Rolls BJ. The effect of increased beverage portion size on energy intake at a meal. J Am Dietetic Assoc 2006;106:1984-90.	1	Meal EI	Same	Relative	Art. Diet cola	360ml	Ad-libitum	Rest	18–45 years	M	F	N & O	UR
Holt SH, Sandona N, Brand-Miller JC.The effects of sugar-free vs sugar-rich beverages on feelings of fullness and subsequent food intake. Int J Food Sci Nutr. 2000 Jan;51(1):59-71.	1	Meal EI	Same	Relative	Art. Diet cola	375ml	Ad-libitum	Rest	19–30 years	M		N	UR
Flood JE, Roe LS, Rolls BJ. The effect of increased beverage portion size on energy intake at a meal. J Am Dietetic Assoc 2006;106:1984-90.	1	Meal EI	Same	Relative	Art. Diet cola	540ml	Ad-libitum	Rest	18–45 years	M	F	N & O	UR
Holt SH, Sandona N, Brand-Miller JC.The effects of sugar-free vs sugar-rich beverages on feelings of fullness and subsequent food intake. Int J Food Sci Nutr. 2000 Jan;51(1):59-71.	1	Day EI	Same	Relative	Art. Diet cola	375ml	Ad-libitum	Usual	19–30 years	M		N	UR
Black RM, Leiter LA, Anderson GH. Consuming aspartame with and without taste: differential effects on appetite and food intake of young adult males. Physiol & Behav 1993; 53:459-466.	1	Meal EI, 60 min	Same	Relative	Art. Diet soda	280ml	Ad-libitum	Rest	19–25 years	M		N	UR, R
Akhavan T, Luhovyy BL, Anderson GH.Effect of drinking compared with eating sugars or whey protein on short-term appetite and food intake. Int J Obes (Lond). 2011 Apr;35(4):562-9. doi: 10.1038/ijo.2010.163. Epub 2010 Aug 24	1	Meal EI, 60min	Same	Relative	Art. Liquid sucralose	300ml	Ad-libitum	Rest	19–28 years	M		N	UR
Akhavan T, Luhovyy BL, Anderson GH.Effect of drinking compared with eating sugars or whey protein on short-term appetite and food intake. Int J Obes (Lond). 2011 Apr;35(4):562-9. doi: 10.1038/ijo.2010.163. Epub 2010 Aug 24	1	Preload+Meal EI 60min	Same	Relative	Art. Liquid sucralose, gelatin	300ml	Ad-libitum	Rest	19–28 years	M		N	UR
Akhavan T, Luhovyy BL, Anderson GH.Effect of drinking compared with eating sugars or whey protein on short-term appetite and food intake. Int J Obes (Lond). 2011 Apr;35(4):562-9. doi: 10.1038/ijo.2010.163. Epub 2010 Aug 24	1	Meal EI, 60min	Same	Relative	Art. Liquid sucralose, gelatin	300ml	Ad-libitum	Rest	19–28 years	M		N	UR
Rogers PJ, Carlyle J, Hill AJ, Blundell JE. Uncoupling sweet taste and calories: comparison of the effects of glucose and three intense sweeteners on hunger and food intake. Physiol & Behav 1988; 43: 547-552.	1	Meal EI, 60 min	Same	Relative	Art. Saccharin	200ml	Ad-libitum	Rest	19–25 years	M	F	N	UR
Canty DJ, Chan MM. Effects of consumption of caloric vs noncaloric sweet drinks on indices of hunger and food consumption in normal adults. Am J Clin Nutr 1991;53:1159-64.	1	Meal EI, 60 min	Same	Relative	Art. Saccharin	200ml	Ad-libitum	Rest	23–37 years	M	F	N	UR
Akhavan T, Anderson GH. Effects of glucose-to-fructose ratios in solutions on subjective satiety, food intake, and satiety hormones in young men. Am J Clin Nutr. 2007 Nov;86(5):1354-63.	1	Meal EI	Same	Relative	Art. Sucralose	300ml	Ad-libitum	Rest	18–35 years	M		N	UR
Appleton KM, Blundell JE. Habitual high and low consumers of artificially-sweetened beverages: effects of sweet taste and energy on short-term appetite. Physiol & Behav 2007; 92: 479-486.	1	Snack, evening	Same	Relative	Art. sweetened drink	330ml	Ad-libitum	Usual day	Adult		F	N & O	HASB
Appleton KM, Blundell JE. Habitual high and low consumers of artificially-sweetened beverages: effects of sweet taste and energy on short-term appetite. Physiol & Behav 2007; 92: 479-486.	1	Snack pm	Same	Relative	Art. sweetened drink	330ml	Ad-libitum	Usual day	Adult		F	N & O	HASB
Appleton KM, Blundell JE. Habitual high and low consumers of artificially-sweetened beverages: effects of sweet taste and energy on short-term appetite. Physiol & Behav 2007; 92: 479-486.	1	Snack pm	Same	Relative	Art. sweetened drink	330ml	Ad-libitum	Usual day	Adult		F	N & O	LASB
Appleton KM, Blundell JE. Habitual high and low consumers of artificially-sweetened beverages: effects of sweet taste and energy on short-term appetite. Physiol & Behav 2007; 92: 479-486.	1	Snack am	Same	Relative	Art. sweetened drink	350ml	Ad-libitum	Usual day	Adult		F	N & O	HASB
Westerterp-plantenga MS, Verwegen CRT. The appetizing effect of an aperitif in overweight and normal weight humans. Am J Clin Nutr 1999;69:205-12.	1	Meal EI, 30min	Same	Relative	Beer	340ml	Ad-libitum	Rest	19–45 years	M		N & O	UR
Westerterp-plantenga MS, Verwegen CRT. The appetizing effect of an aperitif in overweight and normal weight humans. Am J Clin Nutr 1999;69:205-12.	1	Meal EI, 30min	Same	Relative	Beer	340ml	Ad-libitum	Rest	19–45 years		F	N & O	UR
Maersk M, Belza A, Holst JJ, Fenger-Grøn M, Pedersen SB, Astrup A, Richelsen B. Satiety scores and satiety hormone response after sucrose-sweetened soft drink compared with isocaloric semi-skimmed milk and with non-caloric soft drink: a controlled trial. Eur J Clin Nutr. 2012 Apr;66(4):523-9. doi: 10.1038/ejcn.2011.223. Epub 2012 Jan 18.	1	Meal EI, 4 hs	Same	Relative	Cola	500ml	Ad-libitum	Rest	20–50 years		F	O
Flood JE, Roe LS, Rolls BJ. The effect of increased beverage portion size on energy intake at a meal. J Am Dietetic Assoc 2006;106:1984-90.	1	Meal EI	Same	Relative	Cola	360ml	Ad-libitum	Rest	18–45 years	M	F	N & O	UR
Holt SH, Sandona N, Brand-Miller JC.The effects of sugar-free vs sugar-rich beverages on feelings of fullness and subsequent food intake. Int J Food Sci Nutr. 2000 Jan;51(1):59-71.	1	Meal EI	Same	Relative	Cola	375ml	Ad-libitum	Rest	19–30 years	M		N	UR
Flood JE, Roe LS, Rolls BJ. The effect of increased beverage portion size on energy intake at a meal. J Am Dietetic Assoc 2006;106:1984-90.	1	Meal EI	Same	Relative	Cola	540ml	Ad-libitum	Rest	18–45 years	M	F	N & O	UR
Holt SH, Sandona N, Brand-Miller JC.The effects of sugar-free vs sugar-rich beverages on feelings of fullness and subsequent food intake. Int J Food Sci Nutr. 2000 Jan;51(1):59-71.	1	Day EI	Same	Relative	Cola	375ml	Ad-libitum	Usual	19–30 years	M		N	UR
Rodin J. Comparative effects of fructose, aspartame, glucose and water preloads on calorie and macronutrient intake. Am J Clin Nutr 1990; 51:428-35.	1	Preload+Meal EI, 60min	Same	Relative	Fructose drink	500ml	Ad-libitum	Rest	22–50 years	M	F	N & O	UR
Rodin J. Comparative effects of fructose, aspartame, glucose and water preloads on calorie and macronutrient intake. Am J Clin Nutr 1990; 51:428-35.	1	Meal EI, 60 min	Same	Relative	Glucose drink	500ml	Ad-libitum	Rest	22–50 years	M	F	N & O	UR
Akhavan T, Anderson GH. Effects of glucose-to-fructose ratios in solutions on subjective satiety, food intake, and satiety hormones in young men. Am J Clin Nutr. 2007 Nov;86(5):1354-63.	1	Meal EI	Same	Relative	Glucose: Fructose, 80:20	300ml	Ad-libitum	Rest	18–35 years	M		N	UR
Akhavan T, Anderson GH. Effects of glucose-to-fructose ratios in solutions on subjective satiety, food intake, and satiety hormones in young men. Am J Clin Nutr. 2007 Nov;86(5):1354-63.	1	Meal EI	Same	Relative	High fructose corn syrup	300ml	Ad-libitum	Rest	18–35 years	M		N	UR
Panahi S, Luhovyy BL, Liu TT, Akhavan T, El Khoury D, Goff HD, Anderson GH. Energy and macronutrient content of familiar beverages interact with pre-meal intervals to determine later food intake, appetite and glycemic response in young adults. Appetite. 2013 Jan;60(1):154-61.	1	Meal EI, 120 min	Same	Relative	Infant formula	500ml	Ad-libitum	Rest	20–30 years	M	F	N	UR
Akhavan T, Luhovyy BL, Anderson GH.Effect of drinking compared with eating sugars or whey protein on short-term appetite and food intake. Int J Obes (Lond). 2011 Apr;35(4):562-9. doi: 10.1038/ijo.2010.163. Epub 2010 Aug 24	1	Meal EI, 60min	Same	Relative	Liquid gelatin	300ml	Ad-libitum	Rest	19–28 years	M		N	UR
Panahi S, Luhovyy BL, Liu TT, Akhavan T, El Khoury D, Goff HD, Anderson GH. Energy and macronutrient content of familiar beverages interact with pre-meal intervals to determine later food intake, appetite and glycemic response in young adults. Appetite. 2013 Jan;60(1):154-61.	1	Meal EI, 30 min	Same	Relative	Milk 2%	500ml	Ad-libitum	Rest	20–30 years	M	F	N	UR
Panahi S, Luhovyy BL, Liu TT, Akhavan T, El Khoury D, Goff HD, Anderson GH. Energy and macronutrient content of familiar beverages interact with pre-meal intervals to determine later food intake, appetite and glycemic response in young adults. Appetite. 2013 Jan;60(1):154-61.	1	Meal EI, 120 min	Same	Relative	Milk 2%	500ml	Ad-libitum	Rest	20–30 years	M	F	N	UR
Panahi S, Luhovyy BL, Liu TT, Akhavan T, El Khoury D, Goff HD, Anderson GH. Energy and macronutrient content of familiar beverages interact with pre-meal intervals to determine later food intake, appetite and glycemic response in young adults. Appetite. 2013 Jan;60(1):154-61.	1	Meal EI, 120 min	Same	Relative	Milk, 1% chocolate	500ml	Ad-libitum	Rest	20–30 years	M	F	N	UR
Maersk M, Belza A, Holst JJ, Fenger-Grøn M, Pedersen SB, Astrup A, Richelsen B. Satiety scores and satiety hormone response after sucrose-sweetened soft drink compared with isocaloric semi-skimmed milk and with non-caloric soft drink: a controlled trial. Eur J Clin Nutr. 2012 Apr;66(4):523-9. doi: 10.1038/ejcn.2011.223. Epub 2012 Jan 18.	1	Meal EI 4 hs	Same	Relative	Milk, semi-skimmed	500ml	Ad-libitum	Rest	20–50 years		F	O
Panahi S, Luhovyy BL, Liu TT, Akhavan T, El Khoury D, Goff HD, Anderson GH. Energy and macronutrient content of familiar beverages interact with pre-meal intervals to determine later food intake, appetite and glycemic response in young adults. Appetite. 2013 Jan;60(1):154-61.	1	Meal EI, 120 min	Same	Relative	Orange juice	500ml	Ad-libitum	Rest	20–30 years	M	F	N	UR
Panahi S, Luhovyy BL, Liu TT, Akhavan T, El Khoury D, Goff HD, Anderson GH. Energy and macronutrient content of familiar beverages interact with pre-meal intervals to determine later food intake, appetite and glycemic response in young adults. Appetite. 2013 Jan;60(1):154-61.	1	Meal EI, 30 min	Same	Relative	Soy	500ml	Ad-libitum	Rest	20–30 years	M	F	N	UR
Panahi S, Luhovyy BL, Liu TT, Akhavan T, El Khoury D, Goff HD, Anderson GH. Energy and macronutrient content of familiar beverages interact with pre-meal intervals to determine later food intake, appetite and glycemic response in young adults. Appetite. 2013 Jan;60(1):154-61.	1	Meal EI, 120 min	Same	Relative	Soy	500ml	Ad-libitum	Rest	20–30 years	M	F	N	UR
Lavin JH, French SA, Read NW. The effect of sucrose- and aspartame-sweetened drinks on energy intake, hunger and food choice of female, moderately restrained eaters. Int J Obes Relat Metab Disord 1997;21:37-42	1	Preload+Meal EI	Same	Relative	Sucrose	330ml	Ad-libitum	Usual	Adult		F	N & O	R
Canty DJ, Chan MM. Effects of consumption of caloric vs noncaloric sweet drinks on indices of hunger and food consumption in normal adults. Am J Clin Nutr 1991;53:1159-64.	1	Meal EI, 60 min	Same	Relative	Sucrose	200ml	Ad-libitum	Rest	23–37 years	M	F	N	UR
Akhavan T, Anderson GH. Effects of glucose-to-fructose ratios in solutions on subjective satiety, food intake, and satiety hormones in young men. Am J Clin Nutr. 2007 Nov;86(5):1354-63.	1	Meal EI	Same	Relative	Sucrose	300ml	Ad-libitum	Rest	18–35 years	M		N	UR
Lavin JH, French SA, Read NW. The effect of sucrose- and aspartame-sweetened drinks on energy intake, hunger and food choice of female, moderately restrained eaters. Int J Obes Relat Metab Disord 1997;21:37-42	1	Meal EI	Same	Relative	Sucrose	330ml	Ad-libitum	Usual	Adult		F	N & O	R
Akhavan T, Luhovyy BL, Anderson GH.Effect of drinking compared with eating sugars or whey protein on short-term appetite and food intake. Int J Obes (Lond). 2011 Apr;35(4):562-9. doi: 10.1038/ijo.2010.163. Epub 2010 Aug 24	1	Preload+Meal EI 60min	Same	Relative	Sweet whey	300ml	Ad-libitum	Rest	19–28 years	M		N	UR
Akhavan T, Luhovyy BL, Anderson GH.Effect of drinking compared with eating sugars or whey protein on short-term appetite and food intake. Int J Obes (Lond). 2011 Apr;35(4):562-9. doi: 10.1038/ijo.2010.163. Epub 2010 Aug 24	1	Preload+Meal EI 60min	Same	Relative	Sweet whey liquid		Ad-libitum	Rest	19–28 years	M		N	UR
Akhavan T, Luhovyy BL, Brown PH, Cho CE, Anderson GH. Effect of premeal consumption of whey protein and its hydrolysate on food intake and postmeal glycemia and insulin responses in young adults. Am J Clin Nutr. 2010 Apr;91(4):966-75. doi: 10.3945/ajcn.2009.28406. Epub 2010 Feb 17.	1	Preload+Meal EI, 30min	Same	Relative	Whey protein, 10g	300ml	Ad-libitum	Rest	20–27 years	M	F	N	UR
Akhavan T, Luhovyy BL, Brown PH, Cho CE, Anderson GH. Effect of premeal consumption of whey protein and its hydrolysate on food intake and postmeal glycemia and insulin responses in young adults. Am J Clin Nutr. 2010 Apr;91(4):966-75. doi: 10.3945/ajcn.2009.28406. Epub 2010 Feb 17.	1	Meal EI, 30min	Same	Relative	Whey protein, 10g	300ml	Ad-libitum	Rest	20–27 years	M	F	N	UR
Akhavan T, Luhovyy BL, Brown PH, Cho CE, Anderson GH. Effect of premeal consumption of whey protein and its hydrolysate on food intake and postmeal glycemia and insulin responses in young adults. Am J Clin Nutr. 2010 Apr;91(4):966-75. doi: 10.3945/ajcn.2009.28406. Epub 2010 Feb 17.	1	Preload+Meal EI, 30min	Same	Relative	Whey protein, 20g	300ml	Ad-libitum	Rest	20–27 years	M	F	N	UR
Akhavan T, Luhovyy BL, Brown PH, Cho CE, Anderson GH. Effect of premeal consumption of whey protein and its hydrolysate on food intake and postmeal glycemia and insulin responses in young adults. Am J Clin Nutr. 2010 Apr;91(4):966-75. doi: 10.3945/ajcn.2009.28406. Epub 2010 Feb 17.	1	Preload+Meal EI, 30min	Same	Relative	Whey protein, 30g	300ml	Ad-libitum	Rest	20–27 years	M	F	N	UR
Akhavan T, Luhovyy BL, Brown PH, Cho CE, Anderson GH. Effect of premeal consumption of whey protein and its hydrolysate on food intake and postmeal glycemia and insulin responses in young adults. Am J Clin Nutr. 2010 Apr;91(4):966-75. doi: 10.3945/ajcn.2009.28406. Epub 2010 Feb 17.	1	Preload+Meal EI, 30min	Same	Relative	Whey protein, 40g	300ml	Ad-libitum	Rest	20–27 years	M	F	N	UR
Westerterp-plantenga MS, Verwegen CRT. The appetizing effect of an aperitif in overweight and normal weight humans. Am J Clin Nutr 1999;69:205-12.	1	Meal EI, 30min	Same	Relative	Wine	340ml	Ad-libitum	Rest	19–45 years	M		N & O	UR
Westerterp-plantenga MS, Verwegen CRT. The appetizing effect of an aperitif in overweight and normal weight humans. Am J Clin Nutr 1999;69:205-12.	1	Meal EI, 30min	Same	Relative	Wine	340ml	Ad-libitum	Rest	19–45 years		F	N & O	UR
Engell D. Interdependency of food and water intake in humans. Appetite 1988, 10, 133-141.	1	Day EI	Higher	Absolute	43% of usual	43% of usual	Ad-libitum	Usual activity	23 years	M		N	UR
Westerterp-Plantenga MS, Verwegen CR, Ijedema MJ, Wijckmans NE, Saris WH. Acute effects of exercise or sauna on appetite in obese and nonobese men. Physiol Behav. 1997 Dec;62(6):1345-54.	1	Meal EI	Higher	Absolute	No water	3% body wt	Ad-libitum	Dehydrated by exercise & sauna	Adult	M		N & O
Akhavan T, Luhovyy BL, Anderson GH.Effect of drinking compared with eating sugars or whey protein on short-term appetite and food intake. Int J Obes (Lond). 2011 Apr;35(4):562-9. doi: 10.1038/ijo.2010.163. Epub 2010 Aug 24	1	Meal EI, 60min	higher	Relative	Acid whey liquid		Ad-libitum	Rest	19–28 years	M		N	UR
Birch LL, McPhee L, Sullivan S. Children's food intake following drinks sweetened with sucrose or aspartame: time course effects. Physiol Behav. 1989 Feb;45(2):387-95.	1	Meal EI, 30 min	Higher	Relative	Aspartame	205ml	Ad-libitum	Usual classroom	2–5 years	M	F	N & O
Birch LL, McPhee L, Sullivan S. Children's food intake following drinks sweetened with sucrose or aspartame: time course effects. Physiol Behav. 1989 Feb;45(2):387-95.	1	Meal EI, 60 min	Higher	Relative	Aspartame plus maltodextrin	205ml	Ad-libitum	Usual classroom	2–5 years	M	F	N & O
Birch LL, McPhee L, Sullivan S. Children's food intake following drinks sweetened with sucrose or aspartame: time course effects. Physiol Behav. 1989 Feb;45(2):387-95.	1	Meal EI, 30 min	Higher	Relative	Aspartame plus maltodextrin	205ml	Ad-libitum	Usual classroom	2–5 years	M	F	N & O
Birch LL, McPhee L, Sullivan S. Children's food intake following drinks sweetened with sucrose or aspartame: time course effects. Physiol Behav. 1989 Feb;45(2):387-95.	1	Meal EI, 0 min	Higher	Relative	Aspartame plus maltodextrin	205ml	Ad-libitum	Rest	2–5 years	M	F	N & O
Spitzer L, Rodin J. Effects of fructose and glucose preloads on subsequent food intake. Appetite 1987; 8:135-145.	1	Meal EI, 135min	Higher	Relative	Fructose	500ml	Ad-libitum	Rest	Adult	M		O
Spitzer L, Rodin J. Effects of fructose and glucose preloads on subsequent food intake. Appetite 1987; 8:135-145.	1	Meal EI, 135min	Higher	Relative	Fructose	500ml	Ad-libitum	Rest	Adult		F	O
Rodin J. Comparative effects of fructose, aspartame, glucose and water preloads on calorie and macronutrient intake. Am J Clin Nutr 1990; 51:428-35.	1	Meal EI, 60 min	Higher	Relative	Fructose drink	500ml	Ad-libitum	Rest	22–50 years	M	F	N & O	UR
Rogers PJ, Carlyle J, Hill AJ, Blundell JE. Uncoupling sweet taste and calories: comparison of the effects of glucose and three intense sweeteners on hunger and food intake. Physiol & Behav 1988; 43: 547-552.	1	Meal EI, 60 min	Higher	Relative	Glucose	200ml	Ad-libitum	Rest	19–25 years	M	F	N	UR
Akhavan T, Anderson GH. Effects of glucose-to-fructose ratios in solutions on subjective satiety, food intake, and satiety hormones in young men. Am J Clin Nutr. 2007 Nov;86(5):1354-63.	1	Meal EI	Higher	Relative	Glucose: Fructose, 80:20	300ml	Ad-libitum	Rest	18–35 years	M		N	UR
Panahi S, Luhovyy BL, Liu TT, Akhavan T, El Khoury D, Goff HD, Anderson GH. Energy and macronutrient content of familiar beverages interact with pre-meal intervals to determine later food intake, appetite and glycemic response in young adults. Appetite. 2013 Jan;60(1):154-61.	1	Meal EI, 30 min	Higher	Relative	Infant formula	500ml	Ad-libitum	Rest	20–30 years	M	F	N	UR
Chungchunlam SM, Moughan PJ, Henare SJ, Ganesh S. Effect of time of consumption of preloads on measures of satiety in healthy normal weight women. Appetite 2012; 59(2):281-8.	1	Meal EI	Higher	Relative	Maltodextrin	350ml	Ad-libitum	Rest	18–40 years		F	N	UR
Panahi S, Luhovyy BL, Liu TT, Akhavan T, El Khoury D, Goff HD, Anderson GH. Energy and macronutrient content of familiar beverages interact with pre-meal intervals to determine later food intake, appetite and glycemic response in young adults. Appetite. 2013 Jan;60(1):154-61.	1	Meal EI, 30 min	Higher	Relative	Milk, 1% chocolate	500ml	Ad-libitum	Rest	20–30 years	M	F	N	UR
Cecil JE, Palmer CNA, Wrieden W, et al. Energy intakes of children after preloads: adjustment, not compensation. Am J Clin Nutr 2005;82:302-8.	1	Meal EI, 90min	Higher	Relative	Orange drink 1628 kJ	250ml	Ad-libitum	Usual classroom	6–7 years	M	F	N & O
Cecil JE, Palmer CNA, Wrieden W, et al. Energy intakes of children after preloads: adjustment, not compensation. Am J Clin Nutr 2005;82:302-8.	1	Meal EI, 90min	Higher	Relative	Orange drink 1628 kJ	250ml	Ad-libitum	Usual classroom	8–9 years	M	F	N & O
Cecil JE, Palmer CNA, Wrieden W, et al. Energy intakes of children after preloads: adjustment, not compensation. Am J Clin Nutr 2005;82:302-8.	1	Meal EI, 90min	Higher	Relative	Orange drink 783 kJ	250ml	Ad-libitum	Usual classroom	6–7 years	M	F	N & O
Cecil JE, Palmer CNA, Wrieden W, et al. Energy intakes of children after preloads: adjustment, not compensation. Am J Clin Nutr 2005;82:302-8.	1	Meal EI, 90min	Higher	Relative	Orange drink 783 kJ	250ml	Ad-libitum	Usual classroom	8–9 years	M	F	N & O
Birch LL, McPhee L, Sullivan S. Children's food intake following drinks sweetened with sucrose or aspartame: time course effects. Physiol Behav. 1989 Feb;45(2):387-95.	1	Meal EI, 60 min	Higher	Relative	Sucrose	205ml	Ad-libitum	Usual classroom	2–5 years	M	F	N & O
Birch LL, McPhee L, Sullivan S. Children's food intake following drinks sweetened with sucrose or aspartame: time course effects. Physiol Behav. 1989 Feb;45(2):387-95.	1	Meal EI, 30 min	Higher	Relative	Sucrose	205ml	Ad-libitum	Usual classroom	2–5 years	M	F	N & O
Birch LL, McPhee L, Sullivan S. Children's food intake following drinks sweetened with sucrose or aspartame: time course effects. Physiol Behav. 1989 Feb;45(2):387-95.	1	Meal EI, 0 min	Higher	Relative	Sucrose	205ml	Ad-libitum	Rest	2–5 years	M	F	N & O
Woodend DM, Anderson GH. Effect of sucrose and safflower oil preloads on short term appetite and food intake of young men. Appetite 2001; 37: 185-195.	1	Meal EI	Higher	Relative	Sucrose, 25g (418kJ)	360ml	Ad-libitum		18–35 years	M		N & O	UR
Woodend DM, Anderson GH. Effect of sucrose and safflower oil preloads on short term appetite and food intake of young men. Appetite 2001; 37: 185-195.	1	Meal EI	Higher	Relative	Sucrose, 50 g (836 kJ)	360ml	Ad-libitum		18–35 years	M		N & O	UR
Woodend DM, Anderson GH. Effect of sucrose and safflower oil preloads on short term appetite and food intake of young men. Appetite 2001; 37: 185-195.	1	Meal EI	Higher	Relative	Sucrose, 75g (1254 kJ)	360ml	Ad-libitum		18–35 years	M		N & O	UR
Akhavan T, Luhovyy BL, Anderson GH.Effect of drinking compared with eating sugars or whey protein on short-term appetite and food intake. Int J Obes (Lond). 2011 Apr;35(4):562-9. doi: 10.1038/ijo.2010.163. Epub 2010 Aug 24	1	Meal EI, 60min	higher	Relative	Sweet whey liquid		Ad-libitum	Rest	19–28 years	M		N	UR
Chungchunlam SM, Moughan PJ, Henare SJ, Ganesh S. Effect of time of consumption of preloads on measures of satiety in healthy normal weight women. Appetite 2012; 59(2):281-8.	1	Meal EI	Higher	Relative	Whey	350ml	Ad-libitum	Rest	18–40 years		F	N	UR
Akhavan T, Luhovyy BL, Brown PH, Cho CE, Anderson GH. Effect of premeal consumption of whey protein and its hydrolysate on food intake and postmeal glycemia and insulin responses in young adults. Am J Clin Nutr. 2010 Apr;91(4):966-75. doi: 10.3945/ajcn.2009.28406. Epub 2010 Feb 17.	1	Meal EI, 30min	Higher	Relative	Whey protein, 20g	300ml	Ad-libitum	Rest	20–27 years	M	F	N	UR
Akhavan T, Luhovyy BL, Brown PH, Cho CE, Anderson GH. Effect of premeal consumption of whey protein and its hydrolysate on food intake and postmeal glycemia and insulin responses in young adults. Am J Clin Nutr. 2010 Apr;91(4):966-75. doi: 10.3945/ajcn.2009.28406. Epub 2010 Feb 17.	1	Meal EI, 30min	Higher	Relative	Whey protein, 30g	300ml	Ad-libitum	Rest	20–27 years	M	F	N	UR
Akhavan T, Luhovyy BL, Brown PH, Cho CE, Anderson GH. Effect of premeal consumption of whey protein and its hydrolysate on food intake and postmeal glycemia and insulin responses in young adults. Am J Clin Nutr. 2010 Apr;91(4):966-75. doi: 10.3945/ajcn.2009.28406. Epub 2010 Feb 17.	1	Meal EI, 30min	Higher	Relative	Whey protein, 40g	300ml	Ad-libitum	Rest	20–27 years	M	F	N	UR
Maersk M, Belza A, Holst JJ, Fenger-Grøn M, Pedersen SB, Astrup A, Richelsen B. Satiety scores and satiety hormone response after sucrose-sweetened soft drink compared with isocaloric semi-skimmed milk and with non-caloric soft drink: a controlled trial. Eur J Clin Nutr. 2012 Apr;66(4):523-9. doi: 10.1038/ejcn.2011.223. Epub 2012 Jan 18.	0	Preload+Meal EI, 4 hs	Lower	Relative	Cola	500ml	Ad-libitum	Rest	20–50 years		F	O
Anderson GH, Tecimer SN, Shah D, Zafar TA. Protein source, quantity and time of consumption determine the effect of proteins on short-term food intake in young men. J Nutr 2004; 134: 3011-3015.	0	Preload+Meal EI, 1–2 hs later at 11am	Lower	Relative	Egg albumin	400ml	Ad-libitum	Rest	18–35 years	M		N	UR
Anderson GH, Tecimer SN, Shah D, Zafar TA. Protein source, quantity and time of consumption determine the effect of proteins on short-term food intake in young men. J Nutr 2004; 134: 3011-3015.	0	Preload+Meal EI, 1–2 hs later	Lower	Relative	Egg albumin	400ml	Ad-libitum	Rest	18–35 years	M		N	UR
Anderson GH, Tecimer SN, Shah D, Zafar TA. Protein source, quantity and time of consumption determine the effect of proteins on short-term food intake in young men. J Nutr 2004; 134: 3011-3015.	0	Meal EI, 1–2 h at 11am	Lower	Relative	Egg albumin	400ml	Ad-libitum	Rest	18–35 years	M		N	UR
Akhavan T, Luhovyy BL, Anderson GH.Effect of drinking compared with eating sugars or whey protein on short-term appetite and food intake. Int J Obes (Lond). 2011 Apr;35(4):562-9. doi: 10.1038/ijo.2010.163. Epub 2010 Aug 24	0	Preload+Meal EI 60min	Lower	Relative	Glucose: Fructose, 50:50	300ml	Ad-libitum	Rest	19–28 years	M		N	UR
Akhavan T, Luhovyy BL, Anderson GH.Effect of drinking compared with eating sugars or whey protein on short-term appetite and food intake. Int J Obes (Lond). 2011 Apr;35(4):562-9. doi: 10.1038/ijo.2010.163. Epub 2010 Aug 24	0	Preload+Meal EI 60min	Lower	Relative	Liquid sucralose	300ml	Ad-libitum	Rest	19–28 years	M		N	UR
Maersk M, Belza A, Holst JJ, Fenger-Grøn M, Pedersen SB, Astrup A, Richelsen B. Satiety scores and satiety hormone response after sucrose-sweetened soft drink compared with isocaloric semi-skimmed milk and with non-caloric soft drink: a controlled trial. Eur J Clin Nutr. 2012 Apr;66(4):523-9. doi: 10.1038/ejcn.2011.223. Epub 2012 Jan 18.	0	Preload+Meal EI, 4 hs	Lower	Relative	Milk, semi-skimmed	500ml	Ad-libitum	Rest	20–50 years		F	O
Anderson GH, Tecimer SN, Shah D, Zafar TA. Protein source, quantity and time of consumption determine the effect of proteins on short-term food intake in young men. J Nutr 2004; 134: 3011-3015.	0	Preload+Meal EI, 1–2 hs later at 11am	Lower	Relative	Soy	400ml	Ad-libitum	Rest	18–35 years	M		N	UR
Anderson GH, Tecimer SN, Shah D, Zafar TA. Protein source, quantity and time of consumption determine the effect of proteins on short-term food intake in young men. J Nutr 2004; 134: 3011-3015.	0	Preload+Meal EI, 1–2 hs later at 11am	Lower	Relative	sucrose	400ml	Ad-libitum	Rest	18–35 years	M		N	UR
Anderson GH, Tecimer SN, Shah D, Zafar TA. Protein source, quantity and time of consumption determine the effect of proteins on short-term food intake in young men. J Nutr 2004; 134: 3011-3015.	0	Preload+Meal EI, 1–2 hs later	Lower	Relative	sucrose	400ml	Ad-libitum	Rest	18–35 years	M		N	UR
Poppitt SD, Proctor J, McGill AT, Wiessing KR, Falk S, Xin L, Budgett SC, Darragh A, Hall Rs. Low-dose why protein-enriched water beverages alter satiety in a study of overweight women. Appetite 2011; 56(2): 456-64.	0	Preload+Meal EI	Lower	Relative	Whey 1%	500ml	Ad-libitum	Rest	18–45 years	M	F	O	UR
Poppitt SD, Proctor J, McGill AT, Wiessing KR, Falk S, Xin L, Budgett SC, Darragh A, Hall Rs. Low-dose why protein-enriched water beverages alter satiety in a study of overweight women. Appetite 2011; 56(2): 456-64.	0	Preload+Meal EI	Lower	Relative	Whey 2%	500ml	Ad-libitum	Rest	18–45 years	M	F	O	UR
Poppitt SD, Proctor J, McGill AT, Wiessing KR, Falk S, Xin L, Budgett SC, Darragh A, Hall Rs. Low-dose why protein-enriched water beverages alter satiety in a study of overweight women. Appetite 2011; 56(2): 456-64.	0	Preload+Meal EI	Lower	Relative	Whey 4%	500ml	Ad-libitum	Rest	18–45 years	M	F	O	UR
Anderson GH, Catherine NL, Woodend DM, Wolever TM. Inverse association between the effect of carbohydrates on blood glucose and subsequent short-term food intake in young men. Am J Clin Nutr. 2002 Nov;76(5):1023-30.	0	Meal EI, 60 min	Same	Relative	Amylopectin	400ml	Ad-libitum	Rest	18–35 years	M		N	UR
Anderson GH, Catherine NL, Woodend DM, Wolever TM. Inverse association between the effect of carbohydrates on blood glucose and subsequent short-term food intake in young men. Am J Clin Nutr. 2002 Nov;76(5):1023-30.	0	Meal EI, 60 min	Same	Relative	Amylose	400ml	Ad-libitum	Rest	18–35 years	M		N	UR
Flood JE, Roe LS, Rolls BJ. The effect of increased beverage portion size on energy intake at a meal. J Am Dietetic Assoc 2006;106:1984-90.	0	Preload+Meal EI	Same	Relative	Cola	360ml	Ad-libitum	Rest	18–45 years	M	F	N & O	UR
Flood JE, Roe LS, Rolls BJ. The effect of increased beverage portion size on energy intake at a meal. J Am Dietetic Assoc 2006;106:1984-90.	0	Preload+Meal EI	Same	Relative	Cola	540ml	Ad-libitum	Rest	18–45 years	M	F	N & O	UR
Maersk M, Belza A, Holst JJ, Fenger-Grøn M, Pedersen SB, Astrup A, Richelsen B. Satiety scores and satiety hormone response after sucrose-sweetened soft drink compared with isocaloric semi-skimmed milk and with non-caloric soft drink: a controlled trial. Eur J Clin Nutr. 2012 Apr;66(4):523-9. doi: 10.1038/ejcn.2011.223. Epub 2012 Jan 18.	0	Meal EI, 4 hs	Same	Relative	Cola	500ml	Ad-libitum	Rest	20–50 years		F	O
Flood JE, Roe LS, Rolls BJ. The effect of increased beverage portion size on energy intake at a meal. J Am Dietetic Assoc 2006;106:1984-90.	0	Meal EI	Same	Relative	Cola	360ml	Ad-libitum	Rest	18–45 years	M	F	N & O	UR
Flood JE, Roe LS, Rolls BJ. The effect of increased beverage portion size on energy intake at a meal. J Am Dietetic Assoc 2006;106:1984-90.	0	Meal EI	Same	Relative	Cola	540ml	Ad-libitum	Rest	18–45 years	M	F	N & O	UR
Anderson GH, Tecimer SN, Shah D, Zafar TA. Protein source, quantity and time of consumption determine the effect of proteins on short-term food intake in young men. J Nutr 2004; 134: 3011-3015.	0	Preload+Meal EI, 1–2 hs later at 9am	Same	Relative	Egg albumin	400ml	Ad-libitum	Rest	18–35 years	M		N	UR
Anderson GH, Tecimer SN, Shah D, Zafar TA. Protein source, quantity and time of consumption determine the effect of proteins on short-term food intake in young men. J Nutr 2004; 134: 3011-3015.	0	Meal EI, 1–2 h at 9am	Same	Relative	Egg albumin	400ml	Ad-libitum	Rest	18–35 years	M		N	UR
Anderson GH, Tecimer SN, Shah D, Zafar TA. Protein source, quantity and time of consumption determine the effect of proteins on short-term food intake in young men. J Nutr 2004; 134: 3011-3015.	0	Meal EI, 1–2 h	Same	Relative	Egg albumin	400ml	Ad-libitum	Rest	18–35 years	M		N	UR
Anderson GH, Catherine NL, Woodend DM, Wolever TM. Inverse association between the effect of carbohydrates on blood glucose and subsequent short-term food intake in young men. Am J Clin Nutr. 2002 Nov;76(5):1023-30.	0	Meal EI, 60 min	Same	Relative	fructose glucose	400ml	Ad-libitum	Rest	18–35 years	M		N	UR
Akhavan T, Luhovyy BL, Anderson GH.Effect of drinking compared with eating sugars or whey protein on short-term appetite and food intake. Int J Obes (Lond). 2011 Apr;35(4):562-9. doi: 10.1038/ijo.2010.163. Epub 2010 Aug 24	0	Meal EI, 60min	Same	Relative	Glucose: Fructose, 50:50	300ml	Ad-libitum	Rest	19–28 years	M		N	UR
Akhavan T, Luhovyy BL, Anderson GH.Effect of drinking compared with eating sugars or whey protein on short-term appetite and food intake. Int J Obes (Lond). 2011 Apr;35(4):562-9. doi: 10.1038/ijo.2010.163. Epub 2010 Aug 24	0	Meal EI, 60min	Same	Relative	Liquid sucralose, gelatin	300ml	Ad-libitum	Rest	19–28 years	M		N	UR
Maersk M, Belza A, Holst JJ, Fenger-Grøn M, Pedersen SB, Astrup A, Richelsen B. Satiety scores and satiety hormone response after sucrose-sweetened soft drink compared with isocaloric semi-skimmed milk and with non-caloric soft drink: a controlled trial. Eur J Clin Nutr. 2012 Apr;66(4):523-9. doi: 10.1038/ejcn.2011.223. Epub 2012 Jan 18.	0	Meal EI, 4 hs	Same	Relative	Milk, semi-skimmed	500ml	Ad-libitum	Rest	20–50 years		F	O
Anderson GH, Catherine NL, Woodend DM, Wolever TM. Inverse association between the effect of carbohydrates on blood glucose and subsequent short-term food intake in young men. Am J Clin Nutr. 2002 Nov;76(5):1023-30.	0	Meal EI, 60 min	Same	Relative	Polycose	400ml	Ad-libitum	Rest	18–35 years	M		N	UR
Anderson GH, Tecimer SN, Shah D, Zafar TA. Protein source, quantity and time of consumption determine the effect of proteins on short-term food intake in young men. J Nutr 2004; 134: 3011-3015.	0	Preload+Meal EI, 1–2 hs later at 9am	Same	Relative	Soy	400ml	Ad-libitum	Rest	18–35 years	M		N	UR
Anderson GH, Tecimer SN, Shah D, Zafar TA. Protein source, quantity and time of consumption determine the effect of proteins on short-term food intake in young men. J Nutr 2004; 134: 3011-3015.	0	Preload+Meal EI, 1–2 hs later	Same	Relative	Soy	400ml	Ad-libitum	Rest	18–35 years	M		N	UR
Anderson GH, Tecimer SN, Shah D, Zafar TA. Protein source, quantity and time of consumption determine the effect of proteins on short-term food intake in young men. J Nutr 2004; 134: 3011-3015.	0	Meal EI, 1–2 h at 11am	Same	Relative	Soy	400ml	Ad-libitum	Rest	18–35 years	M		N	UR
Anderson GH, Tecimer SN, Shah D, Zafar TA. Protein source, quantity and time of consumption determine the effect of proteins on short-term food intake in young men. J Nutr 2004; 134: 3011-3015.	0	Preload+Meal EI, 1–2 hs later at 9am	Same	Relative	Sucrose	400ml	Ad-libitum	Rest	18–35 years	M		N	UR
Anderson GH, Catherine NL, Woodend DM, Wolever TM. Inverse association between the effect of carbohydrates on blood glucose and subsequent short-term food intake in young men. Am J Clin Nutr. 2002 Nov;76(5):1023-30.	0	Meal EI, 60 min	Same	Relative	Sucrose	400ml	Ad-libitum	Rest	18–35 years	M		N	UR
Anderson GH, Catherine NL, Woodend DM, Wolever TM. Inverse association between the effect of carbohydrates on blood glucose and subsequent short-term food intake in young men. Am J Clin Nutr. 2002 Nov;76(5):1023-30.	0	Meal EI, 60 min	Same	Relative	Sucrose	400ml	Ad-libitum	Rest	18–35 years	M		N	UR
Birch LL, McPhee L, Sullivan S. Children's food intake following drinks sweetened with sucrose or aspartame: time course effects. Physiol Behav. 1989 Feb;45(2):387-95.	0	Meal EI, 30 min	Same	Relative	Sucrose	205ml	Ad-libitum	Usual classroom	2–5 years	M	F	N & O
Anderson GH, Tecimer SN, Shah D, Zafar TA. Protein source, quantity and time of consumption determine the effect of proteins on short-term food intake in young men. J Nutr 2004; 134: 3011-3015.	0	Meal EI, 1–2 h at 11am	Same	Relative	Sucrose	400ml	Ad-libitum	Rest	18–35 years	M		N	UR
Anderson GH, Tecimer SN, Shah D, Zafar TA. Protein source, quantity and time of consumption determine the effect of proteins on short-term food intake in young men. J Nutr 2004; 134: 3011-3015.	0	Meal EI, 1–2 h	Same	Relative	Sucrose	400ml	Ad-libitum	Rest	18–35 years	M		N	UR
Anderson GH, Tecimer SN, Shah D, Zafar TA. Protein source, quantity and time of consumption determine the effect of proteins on short-term food intake in young men. J Nutr 2004; 134: 3011-3015.	0	Preload+Meal EI, 1–2 hs later at 9am	Same	Relative	Whey	400ml	Ad-libitum	Rest	18–35 years	M		N	UR
Anderson GH, Tecimer SN, Shah D, Zafar TA. Protein source, quantity and time of consumption determine the effect of proteins on short-term food intake in young men. J Nutr 2004; 134: 3011-3015.	0	Preload+Meal EI, 1–2 hs later at 11am	Same	Relative	Whey	400ml	Ad-libitum	Rest	18–35 years	M		N	UR
Anderson GH, Tecimer SN, Shah D, Zafar TA. Protein source, quantity and time of consumption determine the effect of proteins on short-term food intake in young men. J Nutr 2004; 134: 3011-3015.	0	Preload+Meal EI, 1–2 hs later	Same	Relative	Whey	400ml	Ad-libitum	Rest	18–35 years	M		N	UR
Anderson GH, Tecimer SN, Shah D, Zafar TA. Protein source, quantity and time of consumption determine the effect of proteins on short-term food intake in young men. J Nutr 2004; 134: 3011-3015.	0	Meal EI, 1–2 h at 11am	Same	Relative	Whey	400ml	Ad-libitum	Rest	18–35 years	M		N	UR
Birch LL, McPhee L, Sullivan S. Children's food intake following drinks sweetened with sucrose or aspartame: time course effects. Physiol Behav. 1989 Feb;45(2):387-95.	0	Meal EI, 60 min	Higher	Relative	Aspartame plus maltodextrin	205ml	Ad-libitum	Usual classroom	2–5 years	M	F	N & O
Birch LL, McPhee L, Sullivan S. Children's food intake following drinks sweetened with sucrose or aspartame: time course effects. Physiol Behav. 1989 Feb;45(2):387-95.	0	Meal EI, 30 min	Higher	Relative	Aspartame plus maltodextrin	205ml	Ad-libitum	Usual classroom	2–5 years	M	F	N & O
Birch LL, McPhee L, Sullivan S. Children's food intake following drinks sweetened with sucrose or aspartame: time course effects. Physiol Behav. 1989 Feb;45(2):387-95.	0	Meal EI, 0 min	Higher	Relative	Aspartame plus maltodextrin	205ml	Ad-libitum	Rest	2–5 years	M	F	N & O
Rogers PJ, Carlyle J, Hill AJ, Blundell JE. Uncoupling sweet taste and calories: comparison of the effects of glucose and three intense sweeteners on hunger and food intake. Physiol & Behav 1988; 43: 547-552.	0	Meal EI, 60 min	Higher	Relative	Glucose	200ml	Ad-libitum	Rest	19–25 years	M	F	N	UR
Rogers PJ, Carlyle J, Hill AJ, Blundell JE. Uncoupling sweet taste and calories: comparison of the effects of glucose and three intense sweeteners on hunger and food intake. Physiol & Behav 1988; 43: 547-552.	0	Meal EI, 60 min	Higher	Relative	Glucose	200ml	Ad-libitum	Rest	19–25 years	M	F	N	UR
Rogers PJ, Carlyle J, Hill AJ, Blundell JE. Uncoupling sweet taste and calories: comparison of the effects of glucose and three intense sweeteners on hunger and food intake. Physiol & Behav 1988; 43: 547-552.	0	Meal EI, 60 min	Higher	Relative	Glucose	200ml	Ad-libitum	Rest	19–25 years	M	F	N	UR
Anderson GH, Catherine NL, Woodend DM, Wolever TM. Inverse association between the effect of carbohydrates on blood glucose and subsequent short-term food intake in young men. Am J Clin Nutr. 2002 Nov;76(5):1023-30.	0	Meal EI, 60 min	Higher	Relative	Glucose	400ml	Ad-libitum	Rest	18–35 years	M		N	UR
Anderson GH, Catherine NL, Woodend DM, Wolever TM. Inverse association between the effect of carbohydrates on blood glucose and subsequent short-term food intake in young men. Am J Clin Nutr. 2002 Nov;76(5):1023-30.	0	Meal EI, 60 min	Higher	Relative	Polycose	400ml	Ad-libitum	Rest	18–35 years	M		N	UR
Woodend DM, Anderson GH. Effect of sucrose and safflower oil preloads on short term appetite and food intake of young men. Appetite 2001; 37: 185-195.	0	Meal EI	Higher	Relative	Safflower oil, 1254 kJ	360ml	Ad-libitum		18–35 years	M		N & O	UR
Woodend DM, Anderson GH. Effect of sucrose and safflower oil preloads on short term appetite and food intake of young men. Appetite 2001; 37: 185-195.	0	Meal EI	Higher	Relative	Safflower oil, 418 kJ	360ml	Ad-libitum		18–35 years	M		N & O	UR
Woodend DM, Anderson GH. Effect of sucrose and safflower oil preloads on short term appetite and food intake of young men. Appetite 2001; 37: 185-195.	0	Meal EI	Higher	Relative	Safflower oil, 836 kJ	360ml	Ad-libitum		18–35 years	M		N & O	UR
Anderson GH, Tecimer SN, Shah D, Zafar TA. Protein source, quantity and time of consumption determine the effect of proteins on short-term food intake in young men. J Nutr 2004; 134: 3011-3015.	0	Meal EI, 1–2 h at 9am	Higher	Relative	Soy	400ml	Ad-libitum	Rest	18–35 years	M		N	UR
Anderson GH, Tecimer SN, Shah D, Zafar TA. Protein source, quantity and time of consumption determine the effect of proteins on short-term food intake in young men. J Nutr 2004; 134: 3011-3015.	0	Meal EI, 1–2 h	Higher	Relative	Soy	400ml	Ad-libitum	Rest	18–35 years	M		N	UR
Birch LL, McPhee L, Sullivan S. Children's food intake following drinks sweetened with sucrose or aspartame: time course effects. Physiol Behav. 1989 Feb;45(2):387-95.	0	Meal EI, 60 min	Higher	Relative	Sucrose	205ml	Ad-libitum	Usual classroom	2–5 years	M	F	N & O
Anderson GH, Tecimer SN, Shah D, Zafar TA. Protein source, quantity and time of consumption determine the effect of proteins on short-term food intake in young men. J Nutr 2004; 134: 3011-3015.	0	Meal EI, 1–2 h at 9am	Higher	Relative	Sucrose	400ml	Ad-libitum	Rest	18–35 years	M		N	UR
Birch LL, McPhee L, Sullivan S. Children's food intake following drinks sweetened with sucrose or aspartame: time course effects. Physiol Behav. 1989 Feb;45(2):387-95.	0	Meal EI, 0 min	Higher	Relative	Sucrose	205ml	Ad-libitum	Rest	2–5 years	M	F	N & O
Anderson GH, Tecimer SN, Shah D, Zafar TA. Protein source, quantity and time of consumption determine the effect of proteins on short-term food intake in young men. J Nutr 2004; 134: 3011-3015.	0	Meal EI, 1–2 h at 9am	Higher	Relative	Whey	400ml	Ad-libitum	Rest	18–35 years	M		N	UR
Anderson GH, Tecimer SN, Shah D, Zafar TA. Protein source, quantity and time of consumption determine the effect of proteins on short-term food intake in young men. J Nutr 2004; 134: 3011-3015.	0	Meal EI, 1–2 h	Higher	Relative	Whey	400ml	Ad-libitum	Rest	18–35 years	M		N	UR

## Sheet: EE vo2
Appendix for: Negative, Null, and Beneficial Effects of Drinking Water on Energy Intake, Energy Expenditure, Fat Oxidation, and Weight Change in Randomized Trials: A Qualitative Review Jodi JD Stookey
Reference	Plain water	Outcome	Drinking water effect	Drinking water exposure	Reference drink	Drink volume	Diet condition	Exercise intensity	Age	Male	Female	Weight status
Berneis K, Ninnis R, Haussinger D, Keller U. Effects of hyper- and hypoosmolality on whole body protein and glucose kinetics in humans. Am J Physiol 1999; 276: E188-E195.	1	vo2	Lower	Absolute	No fluid+iv NaCl		Fasting	Rest	23–27 years	M		N
Berneis K, Ninnis R, Haussinger D, Keller U. Effects of hyper- and hypoosmolality on whole body protein and glucose kinetics in humans. Am J Physiol 1999; 276: E188-E195.	1	vo2	Lower	Absolute	No fluid+iv NaCl		Fasting	Rest	23–27 years	M		N
Brown CM, Dulloo AG, Yepuri G, Montani JP. Fructose ingestion acutely elevates blood pressure in healthy young humans. Am J Physiol Regulatory Integr Comp Physiol 2008; 294: R730-R737.	1	vo2	Lower	Relative	Fructose		Fasting	Rest	21–33 years	M	F	N
Sharief NN, Macdonald I. Differences in dietary induced thermogenesis with various carbohydrates in normal and overweight men. Am J Clin Nutr 1982; 35: 267-272.	1	vo2	Lower	Relative	Glucose		Fasting	Rest	Adult	M		N
Brown CM, Dulloo AG, Yepuri G, Montani JP. Fructose ingestion acutely elevates blood pressure in healthy young humans. Am J Physiol Regulatory Integr Comp Physiol 2008; 294: R730-R737.	1	vo2	Lower	Relative	Glucose		Fasting	Rest	21–33 years	M	F	N
Komatsu T, Nakamori M, Komatsu K, Hosoda K, Okamura M, Toyama K, Ishikura Y, Sakai T, Kunii D, Yamamoto S. Oolong tea increases energy metabolism in Japanese females. J Med Investigation 2003; 50: 170-175.	1	vo2	Lower	Relative	Green tea		Fasting	Rest	19–21 years		F	N
De Jonge L, Agoues I, Garrel DR. Decreased thermogenic response to food with intragastric vs oral feeding. Am J Physiol 1991; 260: E238-E242.	1	vo2	Lower	Relative	Milk		Fasting	Rest	20–30 years	M	F	N
Komatsu T, Nakamori M, Komatsu K, Hosoda K, Okamura M, Toyama K, Ishikura Y, Sakai T, Kunii D, Yamamoto S. Oolong tea increases energy metabolism in Japanese females. J Med Investigation 2003; 50: 170-175.	1	vo2	Lower	Relative	Oolong tea		Fasting	Rest	19–21 years		F	N
De Jonge L, Agoues I, Garrel DR. Decreased thermogenic response to food with intragastric vs oral feeding. Am J Physiol 1991; 260: E238-E242.	1	vo2	Lower	Relative	Orange juice		Fasting	Rest	20–30 years	M	F	N
Li ETS, Tsang BY, Lui SSH. Resting metabolic rate and thermic effects of a sucrose sweetened soft drink during the menstrual cycle in young Chinese women. Can J Physiol Pharmacol 1999; 77: 544-550.	1	vo2	Lower	Relative	Soft drink (sucrose sweetened)		Fasting	Rest	19–24 years		F
Sharief NN, Macdonald I. Differences in dietary induced thermogenesis with various carbohydrates in normal and overweight men. Am J Clin Nutr 1982; 35: 267-272.	1	vo2	Lower	Relative	Sucrose		Fasting	Rest	Adult	M		N
Rumpler W, Seale J, Clevidence B, Judd J, Wiley E, Yamamoto Sh, Komatsu T, Sawaki T, Ishikura Y, Hosoda K. Oolong tea increases metabolic rate and fat oxidation in men. J Nutr 2001; 131: 2848-2852.	1	vo2	Lower	Relative	Caffeine		Fed	Low-Moderate	25–60 years	M		N
Rumpler W, Seale J, Clevidence B, Judd J, Wiley E, Yamamoto Sh, Komatsu T, Sawaki T, Ishikura Y, Hosoda K. Oolong tea increases metabolic rate and fat oxidation in men. J Nutr 2001; 131: 2848-2852.	1	vo2	Lower	Relative	Oolong tea		Fed	Low-Moderate	25–60 years	M		N
Hargreaves M, Dillo P, Angus D, Febbraio M. Effect of fluid ingestion on muscle metabolism during prolonged exercise. J Appl Physiol 1996; 80(1): 363-366.	1	vo2	Same	Absolute	No fluid		Fasting	Low-Moderate	25–30 years	M		N
Berneis K, Ninnis R, Haussinger D, Keller U. Effects of hyper- and hypoosmolality on whole body protein and glucose kinetics in humans. Am J Physiol 1999; 276: E188-E195.	1	vo2	Same	Absolute	Adlibitum fluid		Fasting	Rest	23–27 years	M		N
Del Coso J, Estevez E, Mora-Rodriguez R. Caffeine effects on short-term performance during prolonged exercise in the heat. Med Sci Sports Exerc 2008; 40(4):744-751.	1	vo2	Same	Absolute	No fluid		Fed	Low-Moderate	25–30 years	M		N
Logan-sprenger HM, Heigenhauser GJF, Killian KJ, Spriet LL. Effects of dehydration during cycling on skeletal muscle metabolism in females. Med Sci Sports Exerc; 2012; 44(10): 1949-1957.	1	vo2	Same	Absolute	No fluid		Fed	Low-Moderate	20–25 years		F	N
Lee JKW, Maughan RJ, Shirrefs SM, Watson P. Effects of milk ingestion on prolonged exercise capacity in young, healthy men. Nutrition 2008; 24:340-347.	1	vo2	Same	Relative	Milk 0.1%		Fasting	High	20–30 years	M		N
Lee JKW, Maughan RJ, Shirrefs SM, Watson P. Effects of milk ingestion on prolonged exercise capacity in young, healthy men. Nutrition 2008; 24:340-347.	1	vo2	Same	Relative	Milk+Glucose		Fasting	High	20–30 years	M		N
Lee JKW, Maughan RJ, Shirrefs SM, Watson P. Effects of milk ingestion on prolonged exercise capacity in young, healthy men. Nutrition 2008; 24:340-347.	1	vo2	Same	Relative	Powerade		Fasting	High	20–30 years	M		N
Rowlands DS, Wallis G, Shaw C, Jentjens RLPG, Jeukendrup AE. Glucose polymer molecular weight does not affect exogenous carbohydrate oxidation. Med Sci Sports Exerc 2005; 37(9):1510-1516.	1	vo2	Same	Relative	Amylopectin		Fasting	Low-Moderate	20–40 years	M		N
Rowlands DS, Wallis G, Shaw C, Jentjens RLPG, Jeukendrup AE. Glucose polymer molecular weight does not affect exogenous carbohydrate oxidation. Med Sci Sports Exerc 2005; 37(9):1510-1516.	1	vo2	Same	Relative	Amylopectin		Fasting	Low-Moderate	20–40 years	M		N
Yeo SE, Jentjens RLPG, Wallis GA, Jeukendrup AE. Caffeine increases exogenous carbohydrate oxidation during exercise. J Appl Physiol 2005; 99:844-850.	1	vo2	Same	Relative	Glucose		Fasting	Low-Moderate	25–30 years	M		N
Jentjens RLPG, Achten J, Jeukendrup AE. High oxidation rates from combined carbohydrates ingested during exercise. Med Sci Sports Exerc 2004; 36 (9): 1551-1558.	1	vo2	Same	Relative	Glucose		Fasting	Low-Moderate	25–30 years	M		N
Jentjens RLPG, Venables MC, Jeukendrup AE. Oxidation of exogenous glucose, sucrose, and maltose during prolonged cycling exercise. J Appl Physiol 2004; 96:1285-1291.	1	vo2	Same	Relative	Glucose		Fasting	Low-Moderate	25–30 years	M		N
Jentjens RLPG, Jeukendrup AE. High rates of exogenous carbohydrate oxidation from a mixture of glucose and fructose ingested during prolonged cycling exercise. BJN 2005; 93: 485-492.	1	vo2	Same	Relative	Glucose		Fasting	Low-Moderate	20–30 years	M		N
Jentjens RLPG, Moseley L, Waring RH, Harding LK, Jeukendrup AE. Oxidation of combined ingestion of glucose and fructose during exercise. J Appl Physiol 2004; 96: 1277-84.	1	vo2	Same	Relative	Glucose 13.1%		Fasting	Low-Moderate	25–30 years	M		N
Jentjens RLPG, Moseley L, Waring RH, Harding LK, Jeukendrup AE. Oxidation of combined ingestion of glucose and fructose during exercise. J Appl Physiol 2004; 96: 1277-84.	1	vo2	Same	Relative	Glucose 8.7%		Fasting	Low-Moderate	25–30 years	M		N
Jentjens RLPG, Shaw C, Birtles T, Waring RH, Harding LK, Jeukendrup AE. Oxidation of combined ingestion of glucose and sucrose during exercise. Metabl Clinical Experimental 2005; (54):610-618.	1	vo2	Same	Relative	Glucose 8.7%		Fasting	Low-Moderate	25–35 years	M		N
Yeo SE, Jentjens RLPG, Wallis GA, Jeukendrup AE. Caffeine increases exogenous carbohydrate oxidation during exercise. J Appl Physiol 2005; 99:844-850.	1	vo2	Same	Relative	Glucose+caffeine		Fasting	Low-Moderate	25–30 years	M		N
Pfeiffer B, Stellingwerff T, Zaltas E, Hodgson AB, Jeukendrup AE. Carbohydrate oxidation from a drink during running compared with cycling exercise. Med Sci Sports Exerc 2011; 43(2): 327-334.	1	vo2	Same	Relative	Glucose+Fructose		Fasting	Low-Moderate	30–45 years	M		N
Jentjens RLPG, Moseley L, Waring RH, Harding LK, Jeukendrup AE. Oxidation of combined ingestion of glucose and fructose during exercise. J Appl Physiol 2004; 96: 1277-84.	1	vo2	Same	Relative	Glucose+Fructose		Fasting	Low-Moderate	25–30 years	M		N
Jentjens RLPG, Jeukendrup AE. High rates of exogenous carbohydrate oxidation from a mixture of glucose and fructose ingested during prolonged cycling exercise. BJN 2005; 93: 485-492.	1	vo2	Same	Relative	Glucose+Fructose		Fasting	Low-Moderate	20–30 years	M		N
Jentjens RLPG, Underwood K, Achten J, Currell K, Mann CH, Jeukendrup AE. Exogenous carbohydrate oxidation rates are elevated after combined ingestion of glucose and fructose during exercise in the heat. J Appl Physiol 2006; 100: 807-816.	1	vo2	Same	Relative	Glucose+Fructose		Fasting	Low-Moderate	25–35 years	M		N
Jentjens RLPG, Venables MC, Jeukendrup AE. Oxidation of exogenous glucose, sucrose, and maltose during prolonged cycling exercise. J Appl Physiol 2004; 96:1285-1291.	1	vo2	Same	Relative	Glucose+maltose		Fasting	Low-Moderate	25–30 years	M		N
Jentjens RLPG, Shaw C, Birtles T, Waring RH, Harding LK, Jeukendrup AE. Oxidation of combined ingestion of glucose and sucrose during exercise. Metabl Clinical Experimental 2005; (54):610-618.	1	vo2	Same	Relative	Glucose+sucrose		Fasting	Low-Moderate	25–35 years	M		N
Jentjens RLPG, Venables MC, Jeukendrup AE. Oxidation of exogenous glucose, sucrose, and maltose during prolonged cycling exercise. J Appl Physiol 2004; 96:1285-1291.	1	vo2	Same	Relative	Glucose+sucrose		Fasting	Low-Moderate	25–30 years	M		N
Jentjens RLPG, Shaw C, Birtles T, Waring RH, Harding LK, Jeukendrup AE. Oxidation of combined ingestion of glucose and sucrose during exercise. Metabl Clinical Experimental 2005; (54):610-618.	1	vo2	Same	Relative	Glucose+sucrose 17.5%		Fasting	Low-Moderate	25–35 years	M		N
Jentjens RLPG, Achten J, Jeukendrup AE. High oxidation rates from combined carbohydrates ingested during exercise. Med Sci Sports Exerc 2004; 36 (9): 1551-1558.	1	vo2	Same	Relative	Glucose+sucrose+Fructose		Fasting	Low-Moderate	25–30 years	M		N
Achten J, Jentjens RL, Brouns F, Jeukendrup AE. Exogenous oxidation of isomaltulose is lower than that of sucrose during exercise in men. J Nutr 2007; 137:1143-1148.	1	vo2	Same	Relative	Isomalutose		Fasting	Low-Moderate	25–30 years	M		N
Arkinstall MJ, Bruce CR, Nikolopoulos V, Garnham AP, Hawley JA. Effect of carbohydrate ingestion on metabolism during running and cycling. J Appl Physiol 2001; 91: 2125-2134.	1	vo2	Same	Relative	Lucozade		Fasting	Low-Moderate	25–35 years	M		N
Arkinstall MJ, Bruce CR, Nikolopoulos V, Garnham AP, Hawley JA. Effect of carbohydrate ingestion on metabolism during running and cycling. J Appl Physiol 2001; 91: 2125-2134.	1	vo2	Same	Relative	Lucozade		Fasting	Low-Moderate	25–35 years	M		N
Wallis G, Rowlands DS, Shaw C, Jentjens RLPG, Jeukendrup AE. Oxidation of combined ingestion of Maltodextrins and fructose during exercise. Med Sci Sports Exerc 2005; 37(3): 426-432.	1	vo2	Same	Relative	Maltodextrin		Fasting	Low-Moderate	25–30 years	M		N
Wallis G, Rowlands DS, Shaw C, Jentjens RLPG, Jeukendrup AE. Oxidation of combined ingestion of Maltodextrins and fructose during exercise. Med Sci Sports Exerc 2005; 37(3): 426-432.	1	vo2	Same	Relative	Maltodextrin+Fructose		Fasting	Low-Moderate	25–30 years	M		N
Kirwan JP, O'Gorman DJ, Evans WJ. A moderate glycemic meal before endurance exercise can enhance performance. J Apply Physiol 1998; 84(1): 53-59.	1	vo2	Same	Relative	Oat flour+water		Fasting	Low-Moderate	20–25 years		F	N
Kirwan JP, O'Gorman DJ, Cyr-Campbell D, Campbell WW, Yaraksheski KE, Evans W. Effects of a moderate glycemic meal on exercise duration and substrate utilization. Med Sci Sports Exerc 2001; 33(9): 1517-1523.	1	vo2	Same	Relative	Oats+water		Fasting	Low-Moderate	20–30 years		F	N
Jentjens RLPG, Shaw C, Birtles T, Waring RH, Harding LK, Jeukendrup AE. Oxidation of combined ingestion of glucose and sucrose during exercise. Metabl Clinical Experimental 2005; (54):610-618.	1	vo2	Same	Relative	Sucrose 8.7%		Fasting	Low-Moderate	25–35 years	M		N
Achten J, Jentjens RL, Brouns F, Jeukendrup AE. Exogenous oxidation of isomaltulose is lower than that of sucrose during exercise in men. J Nutr 2007; 137:1143-1148.	1	vo2	Same	Relative	Sugar		Fasting	Low-Moderate	25–30 years	M		N
Kirwan JP, O'Gorman DJ, Evans WJ. A moderate glycemic meal before endurance exercise can enhance performance. J Apply Physiol 1998; 84(1): 53-59.	1	vo2	Same	Relative	Sweet oats+water		Fasting	Low-Moderate	20–25 years		F	N
Venables MC, Brouns F, Jeukendrup AE. Oxidation of maltose and trehalose during prolonged moderate-intensity exercise. Med Sci Sports Exerc 2008; 40 (9):1653-1659.	1	vo2	Same	Relative	Trehalose		Fasting	Low-Moderate	25–35	M		N
Levine L, Evans WJ, Cadarette BS, Fisher EC, Bullen BA. Fructose and glucose ingestion and muscle glycogen use during submaximal exercise. J Appl Physiol 1983; 55(6):1767-1771.	1	vo2	Same	Relative	Fructose		Fed	High	20–30 years	M	F	N
Levine L, Evans WJ, Cadarette BS, Fisher EC, Bullen BA. Fructose and glucose ingestion and muscle glycogen use during submaximal exercise. J Appl Physiol 1983; 55(6):1767-1771.	1	vo2	Same	Relative	Glucose		Fed	High	20–30 years	M	F	N
Del Coso J, Estevez E, Mora-Rodriguez R. Caffeine effects on short-term performance during prolonged exercise in the heat. Med Sci Sports Exerc 2008; 40(4):744-751.	1	vo2	Same	Relative	Gatorade		Fed	Low-Moderate	25–30 years	M		N
Del Coso J, Estevez E, Mora-Rodriguez R. Caffeine effects on short-term performance during prolonged exercise in the heat. Med Sci Sports Exerc 2008; 40(4):744-751.	1	vo2	Same	Relative	Gatorade+caffeine		Fed	Low-Moderate	25–30 years	M		N
Wallis G, Dawson R, Achten J, Webber J, Jeukendrup AE. Metabolic response to carbohydrate ingestion during exercise in males and females. Am J Physiol Endocrinol Metab 2006; 290: E708-E715.	1	vo2	Same	Relative	Glucose		Fed	Low-Moderate	20–40 years	M	F	N
Jentjens RLPG, Underwood K, Achten J, Currell K, Mann CH, Jeukendrup AE. Exogenous carbohydrate oxidation rates are elevated after combined ingestion of glucose and fructose during exercise in the heat. J Appl Physiol 2006; 100: 807-816.	1	vo2	Same	Relative	Glucose		Fed	Low-Moderate	25–35 years	M		N
Jeukendrup AE, Wagenmakers AJM, Stegen JHCH, Gijsen AP, Brouns F, Saris WHM. Carbohydrate ingestion can completely suppress endogenous glucose production during exercise. Am J Physiol 1999; 276 (39): E672-E683.	1	vo2	Same	Relative	Glucose 22% solution		Fed	Low-Moderate	20–22 years			N
Jeukendrup AE, Wagenmakers AJM, Stegen JHCH, Gijsen AP, Brouns F, Saris WHM. Carbohydrate ingestion can completely suppress endogenous glucose production during exercise. Am J Physiol 1999; 276 (39): E672-E683.	1	vo2	Same	Relative	Glucose 4% solution		Fed	Low-Moderate	20–22 years			N
Del Coso J, Estevez E, Mora-Rodriguez R. Caffeine effects on short-term performance during prolonged exercise in the heat. Med Sci Sports Exerc 2008; 40(4):744-751.	1	vo2	Same	Relative	Water+caffeine		Fed	Low-Moderate	25–30 years	M		N
Stookey J, Hamer J, Espinoza G, Higa A, Ng V, Tinajero-Deck L, Havel P, King J. Orange juice limits postprandial fat oxidation after breakfast in normal weight adolescents and adults. Adv Nutr 2012; 3: 629S-635S.	1	vo2	Same	Relative	Orange juice		Fed	Rest	19–38 years	M	F	N
Stookey J, Hamer J, Espinoza G, Higa A, Ng V, Tinajero-Deck L, Havel P, King J. Orange juice limits postprandial fat oxidation after breakfast in normal weight adolescents and adults. Adv Nutr 2012; 3: 629S-635S.	1	vo2	Same	Relative	Orange juice		Fed	Rest	11–17 years	M	F	N
Boschmann M, Steiniger J, Franke G, Birkenfield AL, Luft FC, Jordan J. Water drinking induces thermogenesis through osmosensitive mechanisms. J Clin Endocrinol Metab 2007; 92: 3334-3337.	1	vo2	Higher	Absolute	500 vs 50ml		Fasting	Rest	20–42 years	M	F	O
Boschmann M, Steiniger J, Franke G, Birkenfield AL, Luft FC, Jordan J. Water drinking induces thermogenesis through osmosensitive mechanisms. J Clin Endocrinol Metab 2007; 92: 3334-3337.	1	vo2	Higher	Relative	Saline		Fasting	Rest	20–42 years	M	F	O
Adopo E, Peronnet F, Massicotte D, Brisson GR, Hillaire-Marcel C. Respective oxidation of exogenous glucose and fructose given in the same drink during exercise. J Appl Physiol 1994; 76(3):1014-1019.	1	vo2	Higher	Relative	Fructose 100		Fed	Low-Moderate	20–30 years	M		N
Adopo E, Peronnet F, Massicotte D, Brisson GR, Hillaire-Marcel C. Respective oxidation of exogenous glucose and fructose given in the same drink during exercise. J Appl Physiol 1994; 76(3):1014-1019.	1	vo2	Higher	Relative	Fructose 50		Fed	Low-Moderate	20–30 years	M		N
Adopo E, Peronnet F, Massicotte D, Brisson GR, Hillaire-Marcel C. Respective oxidation of exogenous glucose and fructose given in the same drink during exercise. J Appl Physiol 1994; 76(3):1014-1019.	1	vo2	Higher	Relative	Glucose 100		Fed	Low-Moderate	20–30 years	M		N
Adopo E, Peronnet F, Massicotte D, Brisson GR, Hillaire-Marcel C. Respective oxidation of exogenous glucose and fructose given in the same drink during exercise. J Appl Physiol 1994; 76(3):1014-1019.	1	vo2	Higher	Relative	Glucose 50		Fed	Low-Moderate	20–30 years	M		N
Adopo E, Peronnet F, Massicotte D, Brisson GR, Hillaire-Marcel C. Respective oxidation of exogenous glucose and fructose given in the same drink during exercise. J Appl Physiol 1994; 76(3):1014-1019.	1	vo2	Higher	Relative	Glucose 50+ Fructose 50		Fed	Low-Moderate	20–30 years	M		N
Coggan AR, Coyle EF. Effect of carbohydrate feedings during high intensity exercise. J Appl Physiol 1988; 65(4): 1703-1709.	0	vo2	Lower	Relative	Glucose+sucrose		Fasting	High	20–25 years	M		N
Wright DA, Sherman WM, Dernbach AR. Carbohydrate feedings before, during or in combination improve cycling endurance performance. J Appl Physiol 1991; 71(3): 1082-1088.	0	vo2	Lower	Relative	Glucose+Fructose during exercise		Fasting	Low-Moderate	20–30 years	M	F	N
Wright DA, Sherman WM, Dernbach AR. Carbohydrate feedings before, during or in combination improve cycling endurance performance. J Appl Physiol 1991; 71(3): 1082-1088.	0	vo2	Lower	Relative	Glucose+sucrose before exercise		Fasting	Low-Moderate	20–30 years	M	F	N
Wright DA, Sherman WM, Dernbach AR. Carbohydrate feedings before, during or in combination improve cycling endurance performance. J Appl Physiol 1991; 71(3): 1082-1088.	0	vo2	Lower	Relative	Glucose+sucrose before exercise + Glucose+Fructose during exercise		Fasting	Low-Moderate	20–30 years	M	F	N
Sherman WM, Brodowicz G, Wright DA, Allen WK, Simonsen J, Dernbach A. Effects of 4h preexercise carbohydrate feedings on cycling performance. Med Sci Sports Exerc 1989; 21(5): 598-604.	0	vo2	Lower	Relative	Sucrose+Maltodextrin		Fasting	Low-Moderate	25–35 years	M	F	N
Hursel R, Westerterp-Plantenga MS. Consumption of milk-protein combined with green tea modulates diet-induced thermogenesis. Nutrients 2011; 3: 725-733.	0	vo2	Lower	Relative	Milk		Fasting	Rest	18–60 years	M	F	N & O
Mitchell JB, Costill DL, Houmard JA, Fink WJ, Pascoe DD, Pearson DR. Influence of carbohydrate dosage on exercise performance and glycogen metabolism. J Appl Physiol 1989; 67(5): 1843-1849.	0	vo2	Lower	Relative	Glucose+Fructose 12% solution		Fed	High	20–30 years	M		N
Mitchell JB, Costill DL, Houmard JA, Fink WJ, Pascoe DD, Pearson DR. Influence of carbohydrate dosage on exercise performance and glycogen metabolism. J Appl Physiol 1989; 67(5): 1843-1849.	0	vo2	Lower	Relative	Glucose+Fructose 18% solution		Fed	High	20–30 years	M		N
Hulmi JJ, Volek JS, Selanne H, Mero AA. Protein ingestion prior to strength exercise affects blood hormones and metabolism. Med Sci Sports Exerc 2005; 37(11):1990-1997	0	vo2	Lower	Relative	Whey caseinate		Fed	Rest	20–30 years	M		N
Below PR, Mora-Rodriguez R, Gonzalez-Alonzo J, Coyle EF. Fluid and carbohydrate ingestion independently improve performance during 1h of intense exercise. Med Sci Sports Exerc 1995; 27(2):200-210.	0	vo2	Same	Absolute	200		Fasting	High	20–25 years	M		N
Fritzsche RG, Switzer TW, Hodgkinson BJ, Lee SH, Martin GC, Coyle EF. Water and carbohydrate ingestion during prolonged exercise increase maximal neuromuscular power. J Appl Physiol. 2000; 88: 730-337.	0	vo2	Same	Absolute	490		Fasting	Low-Moderate	20–25 years	M		N
Below PR, Mora-Rodriguez R, Gonzalez-Alonzo J, Coyle EF. Fluid and carbohydrate ingestion independently improve performance during 1h of intense exercise. Med Sci Sports Exerc 1995; 27(2):200-210.	0	vo2	Same	Relative	Electrolyte placebo		Fasting	High	20–25 years	M		N
Below PR, Mora-Rodriguez R, Gonzalez-Alonzo J, Coyle EF. Fluid and carbohydrate ingestion independently improve performance during 1h of intense exercise. Med Sci Sports Exerc 1995; 27(2):200-210.	0	vo2	Same	Relative	Gatorade 6%		Fasting	High	20–25 years	M		N
Hargreaves M, Costill DL, Fink WJ, King DS, Fielding RA. Effect of pre-exercise carbohydrate feedings on endurance cycling performance. Med Sci Sports Exerc 1987; 19 (1) 33-36.	0	vo2	Same	Relative	Glucose		Fasting	High	20–22 years	M		N
Achten J, Jeukendrup AE. The effect of pre-exercise carbohydrate feedings on the intensity that elicits maximal fat oxidation. J Sports Sci 2003; 21: 1017-1024.	0	vo2	Same	Relative	Glucose		Fasting	High	20–30 years	M		N
Below PR, Mora-Rodriguez R, Gonzalez-Alonzo J, Coyle EF. Fluid and carbohydrate ingestion independently improve performance during 1h of intense exercise. Med Sci Sports Exerc 1995; 27(2):200-210.	0	vo2	Same	Relative	Maltodextrin 40%		Fasting	High	20–25 years	M		N
Flynn MG, Costill DL, Hawley JA, Fink WJ, Neufer PD, Fielding RA, Sleeper MD. Influence of selected carbohydrate drinks on cycling performance and glycogen use. Med Sci Sports Exerc 1987; 19(1):37-40.	0	vo2	Same	Relative	Maltodextrin+Fructose		Fasting	High	25	M		N
Flynn MG, Costill DL, Hawley JA, Fink WJ, Neufer PD, Fielding RA, Sleeper MD. Influence of selected carbohydrate drinks on cycling performance and glycogen use. Med Sci Sports Exerc 1987; 19(1):37-40.	0	vo2	Same	Relative	Maltodextrin+Glucose		Fasting	High	25	M		N
Flynn MG, Costill DL, Hawley JA, Fink WJ, Neufer PD, Fielding RA, Sleeper MD. Influence of selected carbohydrate drinks on cycling performance and glycogen use. Med Sci Sports Exerc 1987; 19(1):37-40.	0	vo2	Same	Relative	Maltodextrin+High fructose corn syrup		Fasting	High	25	M		N
Fielding RA, Costill DL, Fink WJ, King DS, Kovaleski JE, Kirwan JP. Effects of pre-exercise carbohydrate feedings on muscle glycogen use during exercise in well-trained runners. Eur J Appl Physiol 1987; 56:225-229.	0	vo2	Same	Relative	Fructose		Fasting	Low-Moderate	20–30 years	M		N
Fielding RA, Costill DL, Fink WJ, King DS, Kovaleski JE, Kirwan JP. Effects of pre-exercise carbohydrate feedings on muscle glycogen use during exercise in well-trained runners. Eur J Appl Physiol 1987; 56:225-229.	0	vo2	Same	Relative	Glucose		Fasting	Low-Moderate	20–30 years	M		N
Gleeson M, Maughan RJ, Greenhaff PL. Comparison of the effects of pre-exercise feeding of glucose, glycerol and placebo on endurance and fuel homeostasis in man. Eur J Appl Physiol 1986; 55:645-653.	0	vo2	Same	Relative	Glucose		Fasting	Low-Moderate	25–35 years	M		N
Coggan AR, Coyle EF. Effect of carbohydrate feedings during high intensity exercise. J Appl Physiol 1988; 65(4): 1703-1709.	0	vo2	Same	Relative	Glucose+sucrose		Fasting	Low-Moderate	20–25 years	M		N
Gleeson M, Maughan RJ, Greenhaff PL. Comparison of the effects of pre-exercise feeding of glucose, glycerol and placebo on endurance and fuel homeostasis in man. Eur J Appl Physiol 1986; 55:645-653.	0	vo2	Same	Relative	Glycerol		Fasting	Low-Moderate	25–35 years	M		N
Febbraio MA, Steward KL. CHO feeding before prolonged exercise: effect of glycemic index on muscle glycogenolysis and exercise performance. J Appl Physiol 1996; 81:1115-1120.	0	vo2	Same	Relative	Lentils		Fasting	Low-Moderate	25–35 years	M		N
Roberts JD, Tarpey MD, Kass LS, Tarpey RJ, Roberts MG. Assessing a commercially available sports drink on exogenous carbohydrate oxidation, fluid delivery and sustained exercise performance. J Int Soc Sports Nutr 2014; 11: 8	0	vo2	Same	Relative	Maltodextrin		Fasting	Low-Moderate	20–40 years	M		N
Roberts JD, Tarpey MD, Kass LS, Tarpey RJ, Roberts MG. Assessing a commercially available sports drink on exogenous carbohydrate oxidation, fluid delivery and sustained exercise performance. J Int Soc Sports Nutr 2014; 11: 8	0	vo2	Same	Relative	Maltodextrin+Fructose		Fasting	Low-Moderate	20–40 years	M		N
Febbraio MA, Steward KL. CHO feeding before prolonged exercise: effect of glycemic index on muscle glycogenolysis and exercise performance. J Appl Physiol 1996; 81:1115-1120.	0	vo2	Same	Relative	Mashed potato		Fasting	Low-Moderate	25–35 years	M		N
Fritzsche RG, Switzer TW, Hodgkinson BJ, Lee SH, Martin GC, Coyle EF. Water and carbohydrate ingestion during prolonged exercise increase maximal neuromuscular power. J Appl Physiol. 2000; 88: 730-337.	0	vo2	Same	Relative	Sucrose+Glucose		Fasting	Low-Moderate	20–25 years	M		N
Fritzsche RG, Switzer TW, Hodgkinson BJ, Lee SH, Martin GC, Coyle EF. Water and carbohydrate ingestion during prolonged exercise increase maximal neuromuscular power. J Appl Physiol. 2000; 88: 730-337.	0	vo2	Same	Relative	Sucrose+Glucose		Fasting	Low-Moderate	20–25 years	M		N
McConnell GK, Canny BJ, Daddo MC, Nance MJ, Snow RJ. Effect of carbohydrate ingestion on glucose kinetics and muscle metabolism during intense endurance exercise. J Appl Physiol 2000; 89: 1690-1698.	0	vo2	Same	Relative	Glucose		Fed	High	24 years	M		N
Bosch AN, Weltan SM, Dennis SC, Noakes TD. Fuel substrate kinetics of carbohydrate loading differs from that of carbohydrate ingestion during prolonged exercise. Metabolism 1996; 45(4):415-423.	0	vo2	Same	Relative	Glucose polymer		Fed	High	20–30 years	M		N
Mitchell JB, Costill DL, Houmard JA, Fink WJ, Pascoe DD, Pearson DR. Influence of carbohydrate dosage on exercise performance and glycogen metabolism. J Appl Physiol 1989; 67(5): 1843-1849.	0	vo2	Same	Relative	Glucose+Fructose 12% solution		Fed	High	20–30 years	M		N
Mitchell JB, Costill DL, Houmard JA, Fink WJ, Pascoe DD, Pearson DR. Influence of carbohydrate dosage on exercise performance and glycogen metabolism. J Appl Physiol 1989; 67(5): 1843-1849.	0	vo2	Same	Relative	Glucose+Fructose 18% solution		Fed	High	20–30 years	M		N
Mitchell JB, Costill DL, Houmard JA, Fink WJ, Pascoe DD, Pearson DR. Influence of carbohydrate dosage on exercise performance and glycogen metabolism. J Appl Physiol 1989; 67(5): 1843-1849.	0	vo2	Same	Relative	Glucose+Sucrose 6% solution		Fed	High	20–30 years	M		N
Mitchell JB, Costill DL, Houmard JA, Fink WJ, Pascoe DD, Pearson DR. Influence of carbohydrate dosage on exercise performance and glycogen metabolism. J Appl Physiol 1989; 67(5): 1843-1849.	0	vo2	Same	Relative	Glucose+Sucrose 6% solution		Fed	High	20–30 years	M		N
Bilzon JLJ, Murphy JL, Allsopp AJ, Wootton SA, Williams C. Influence of glucose ingestion by humans during recovery from exercise on substrate utilisation during subsequent exercise in a warm environment. Eur J Appl Physiol 2002; 87: 318-326.	0	vo2	Same	Relative	Glucose		Fed	Low-Moderate	30–35 years	M		N
Riddell MC, Bar-Or O, Wilk B, Parolin ML, Heigenhauser GJF. Substrate utilization during exercise with glucose and glucose plus fructose ingestion in boys ages 10-14yr. J Appl Physiol 2001; 90:903-911.	0	vo2	Same	Relative	Glucose		Fed	Low-Moderate	11–14 years	M		N
Campbell SE, Angus DJ, Febbraio MA. Glucose kinetics and exercise performance during phases of the menstrual cycle: effect of glucose ingestion. Am J Physiol Endocrinol Metab 2001; 281: E817-E825.	0	vo2	Same	Relative	Glucose in follicular phase		Fed	Low-Moderate	20–30 years		F	N
Campbell SE, Angus DJ, Febbraio MA. Glucose kinetics and exercise performance during phases of the menstrual cycle: effect of glucose ingestion. Am J Physiol Endocrinol Metab 2001; 281: E817-E825.	0	vo2	Same	Relative	Glucose in luteal phase		Fed	Low-Moderate	20–30 years		F	N
Riddell MC, Bar-Or O, Wilk B, Parolin ML, Heigenhauser GJF. Substrate utilization during exercise with glucose and glucose plus fructose ingestion in boys ages 10-14yr. J Appl Physiol 2001; 90:903-911.	0	vo2	Same	Relative	Glucose+Fructose		Fed	Low-Moderate	11–14 years	M		N
Febbraio MA, Chiu A, Angus DJ, Arkinstall MJ, Hawley JA. Effects of carbohydrate ingestion before and during exercise on glucose kinetics and performance. J Appl Physiol 2000; 89: 2220-2226.	0	vo2	Same	Relative	Lucozade before, during		Fed	Low-Moderate	20–35 years	M		N
Febbraio MA, Chiu A, Angus DJ, Arkinstall MJ, Hawley JA. Effects of carbohydrate ingestion before and during exercise on glucose kinetics and performance. J Appl Physiol 2000; 89: 2220-2226.	0	vo2	Same	Relative	Lucozade before, not during		Fed	Low-Moderate	20–35 years	M		N
Febbraio MA, Chiu A, Angus DJ, Arkinstall MJ, Hawley JA. Effects of carbohydrate ingestion before and during exercise on glucose kinetics and performance. J Appl Physiol 2000; 89: 2220-2226.	0	vo2	Same	Relative	Lucozade not before, during		Fed	Low-Moderate	20–35 years	M		N
Murray R, Seifert JG, Eddy DE, Paul GL, Halaby GA. Carbohydrate feeding and exercise: effect of beverage carbohydrate content.Eur J Appl Physiol 1989; 59:152-158.	0	vo2	Same	Relative	Sucrose 10%		Fed	Low-Moderate	25–35 years	M		N
Murray R, Seifert JG, Eddy DE, Paul GL, Halaby GA. Carbohydrate feeding and exercise: effect of beverage carbohydrate content.Eur J Appl Physiol 1989; 59:152-158.	0	vo2	Same	Relative	Sucrose 6%		Fed	Low-Moderate	25–35 years	M		N
Murray R, Seifert JG, Eddy DE, Paul GL, Halaby GA. Carbohydrate feeding and exercise: effect of beverage carbohydrate content.Eur J Appl Physiol 1989; 59:152-158.	0	vo2	Same	Relative	Sucrose 8%		Fed	Low-Moderate	25–35 years	M		N
Timmons BW, Bar-Or O, Riddell MC. Oxidation rate of exogenous carbohydrate during exercise is higher in boys than in men. Appl Physiol Nutr Metab. 2003; 94: 278-284.	0	vo2	Same	Relative	Sucrose+Glucose		Fed	Low-Moderate	9 years	M		N
Timmons BW, Bar-Or O, Riddell MC. Oxidation rate of exogenous carbohydrate during exercise is higher in boys than in men. Appl Physiol Nutr Metab. 2003; 94: 278-284.	0	vo2	Same	Relative	Sucrose+Glucose		Fed	Low-Moderate	22 years	M		N
Bilzon JLJ, Murphy JL, Allsopp AJ, Wootton SA, Williams C. Influence of glucose ingestion by humans during recovery from exercise on substrate utilisation during subsequent exercise in a warm environment. Eur J Appl Physiol 2002; 87: 318-326.	0	vo2	Same	Relative	Glucose		Fed	Rest	30–35 years	M		N
Jenkins DG, Hutchins CA, Spillman D. The influence of dietary carbohydrate and pre exercise glucose consumption on supramaximal intermittent exercise performance. Br J Sp Med 1994; 28(3): 171.	0	vo2	Higher	Relative	Glucose		Fed	High	18–22 years	M		N
Blacker SD, Williams NC, Fallowfield JL, Willems MET. The effect of a carbohydrate beverage on the physiological responses during prolonged load carriage. Eur J Appl Physiol 2011; 111: 1901-1908.	0	vo2	Higher	Relative	Glucose		Fed	Low-Moderate	25–35 years	M		N
Chu L, Riddell MC, Takken T, Timmons BW. Carbohydrate intake reduces fat oxidation during exercise in obese boys. Eur J Appl Physiol 2011; 111: 3135-3141.	0	vo2	Higher	Relative	Glucose		Fed	Low-Moderate	9–12 years	M		O

## Sheet: Fat oxidation
Appendix for: Negative, Null, and Beneficial Effects of Drinking Water on Energy Intake, Energy Expenditure, Fat Oxidation, and Weight Change in Randomized Trials: A Qualitative Review Jodi JD Stookey
Reference	Plain water	Outcome	Drinking water effect	Drinking water exposure	Reference drink	Drink volume	Diet condition	Exercise intensity	Age	Male	Female	Weight status
Rumpler W, Seale J, Clevidence B, Judd J, Wiley E, Yamamoto Sh, Komatsu T, Sawaki T, Ishikura Y, Hosoda K. Oolong tea increases metabolic rate and fat oxidation in men. J Nutr 2001; 131: 2848-2852.	1	Fat oxidation	Lower	Relative	Caffeine		Fed	Low-Moderate	25–60 years	M		N
Rumpler W, Seale J, Clevidence B, Judd J, Wiley E, Yamamoto Sh, Komatsu T, Sawaki T, Ishikura Y, Hosoda K. Oolong tea increases metabolic rate and fat oxidation in men. J Nutr 2001; 131: 2848-2852.	1	Fat oxidation	Lower	Relative	Ooolong tea		Fed	Low-Moderate	25–60 years	M		N
Lee JKW, Maughan RJ, Shirrefs SM, Watson P. Effects of Milk ingestion on prolonged exercise capacity in young, healthy men. Nutrition 2008; 24:340-347.	1	Fat oxidation	Same	Relative	Milk 1%		Fasting	High	20–30 years	M		N
Lee JKW, Maughan RJ, Shirrefs SM, Watson P. Effects of Milk ingestion on prolonged exercise capacity in young, healthy men. Nutrition 2008; 24:340-347.	1	Fat oxidation	Same	Relative	Milk 1% +Glucose		Fasting	High	20–30 years	M		N
Lee JKW, Maughan RJ, Shirrefs SM, Watson P. Effects of Milk ingestion on prolonged exercise capacity in young, healthy men. Nutrition 2008; 24:340-347.	1	Fat oxidation	Same	Relative	Powerade		Fasting	High	20–30 years	M		N
Wagenmakers AJM, Brouns F, Saris WHM, Halliday D. Oxidation rates of orally ingested carbohydrates during prolonged exercise in men. J Appl Physiol 1993; 75(6):2774-2780.	1	Fat oxidation	Same	Relative	Maltodextrin 8%		Fed	Low-Moderate	20–30 years	M		N
Wagenmakers AJM, Brouns F, Saris WHM, Halliday D. Oxidation rates of orally ingested carbohydrates during prolonged exercise in men. J Appl Physiol 1993; 75(6):2774-2780.	1	Fat oxidation	Same	Relative	Sucrose 8%		Fed	Low-Moderate	20–30 years	M		N
Del Coso J, Estevez E, Mora-Rodriguez R. Caffeine effects on short-term performance during prolonged exercise in the heat. Med Sci Sports Exerc 2008; 40(4):744-751.	1	Fat oxidation	Same	Relative	Water+caffeine		Fed	Low-Moderate	25–30 years	M		N
Maughan RJ, Bethell LR, Leiper JB. Effects of ingested fluids on exercise capacity and on cardiovascular and metabolic responses to prolonged exercise in man. Experimental Physiol 1996; 81: 847-859.	1	Fat oxidation	Higher	Absolute	No drink		Fasting	High	23–25 years	M		N
Hargreaves M, Dillo P, Angus D, Febbraio M. Effect of fluid ingestion on muscle metabolism during prolonged exercise. J Appl Physiol 1996; 80(1): 363-366.	1	Fat oxidation	Higher	Absolute	No fluid		Fasting	Low-Moderate	25–30 years	M		N
Fallowfield JL, Williams C, Booth J, Choo BH, Growns S. Effect of water ingestion on endurance capacity during prolonged running. J Sports Sci 1996; 14(6): 497-502.	1	Fat oxidation	Higher	Absolute	No fluid		Fasting	Low-Moderate	20–25 years	M	F	N
Boschmann M, Steiniger J, Franke G, Birkenfield AL, Luft FC, Jordan J. Water drinking induces thermogenesis through osmosensitive mechanisms. J Clin Endocrinol Metab 2007; 92: 3334-3337.	1	Fat oxidation	Higher	Absolute	500 vs 50ml		Fasting	Rest	20–42 years	M	F	O
Berneis K, Ninnis R, Haussinger D, Keller U. Effects of hyper- and hypoosmolality on whole body protein and glucose kinetics in humans. Am J Physiol 1999; 276: E188-E195.	1	Fat oxidation	Higher	Absolute	adlibitum fluid		Fasting	Rest	23–27 years	M		N
Berneis K, Ninnis R, Haussinger D, Keller U. Effects of hyper- and hypoosmolality on whole body protein and glucose kinetics in humans. Am J Physiol 1999; 276: E188-E195.	1	Fat oxidation	Higher	Absolute	No fluid+iv NaCl		Fasting	Rest	23–27 years	M		N
Logan-sprenger HM, Heigenhauser GJF, Killian KJ, Spriet LL. Effects of dehydration during cycling on skeletal muscle metabolism in females. Med Sci Sports Exerc; 2012; 44(10): 1949-1957.	1	Fat oxidation	Higher	Absolute	No fluid		Fed	Low-Moderate	20–25 years		F	N
Maughan RJ, Bethell LR, Leiper JB. Effects of ingested fluids on exercise capacity and on cardiovascular and metabolic responses to prolonged exercise in man. Experimental Physiol 1996; 81: 847-859.	1	Fat oxidation	Higher	Relative	Hypotonic Glucose		Fasting	High	23–25 years	M		N
Maughan RJ, Bethell LR, Leiper JB. Effects of ingested fluids on exercise capacity and on cardiovascular and metabolic responses to prolonged exercise in man. Experimental Physiol 1996; 81: 847-859.	1	Fat oxidation	Higher	Relative	Isotonic Glucose		Fasting	High	23–25 years	M		N
Shin YH, Jung HL, Ryu JW, Kim PS, Ha TY, An JY, Kang HY. Effects of a pre-exercise meal on plasma growth hormone response and fat oxidation during walking. Proc Nutr Food Sci 2013; 18(3):175-180.	1	Fat oxidation	Higher	Relative	Glucose		Fasting	Low-Moderate	20–25 years	M		N
Yeo SE, Jentjens RLPG, Wallis GA, Jeukendrup AE. Caffeine increases exogenous carbohydrate oxidation during exercise. J Appl Physiol 2005; 99:844-850.	1	Fat oxidation	Higher	Relative	Glucose		Fasting	Low-Moderate	25–30 years	M		N
Jentjens RLPG, Achten J, Jeukendrup AE. High oxidation rates from combined carbohydrates ingested during exercise. Med Sci Sports Exerc 2004; 36 (9): 1551-1558.	1	Fat oxidation	Higher	Relative	Glucose		Fasting	Low-Moderate	25–30 years	M		N
Jentjens RLPG, Venables MC, Jeukendrup AE. Oxidation of exogenous glucose, sucrose, and maltose during prolonged cycling exercise. J Appl Physiol 2004; 96:1285-1291.	1	Fat oxidation	Higher	Relative	Glucose		Fasting	Low-Moderate	25–30 years	M		N
Jentjens RLPG, Jeukendrup AE. High rates of exogenous carbohydrate oxidation from a mixture of glucose and fructose ingested during prolonged cycling exercise. BJN 2005; 93: 485-492.	1	Fat oxidation	Higher	Relative	Glucose		Fasting	Low-Moderate	20–30 years	M		N
Jentjens RLPG, Moseley L, Waring RH, Harding LK, Jeukendrup AE. Oxidation of combined ingestion of glucose and fructose during exercise. J Appl Physiol 2004; 96: 1277-84.	1	Fat oxidation	Higher	Relative	Glucose 13.1%		Fasting	Low-Moderate	25–30 years	M		N
Jentjens RLPG, Moseley L, Waring RH, Harding LK, Jeukendrup AE. Oxidation of combined ingestion of glucose and fructose during exercise. J Appl Physiol 2004; 96: 1277-84.	1	Fat oxidation	Higher	Relative	Glucose 8.7%		Fasting	Low-Moderate	25–30 years	M		N
Jentjens RLPG, Shaw C, Birtles T, Waring RH, Harding LK, Jeukendrup AE. Oxidation of combined ingestion of glucose and sucrose during exercise. Metabl Clinical Experimental 2005; (54):610-618.	1	Fat oxidation	Higher	Relative	Glucose 8.7%		Fasting	Low-Moderate	25–35 years	M		N
Yeo SE, Jentjens RLPG, Wallis GA, Jeukendrup AE. Caffeine increases exogenous carbohydrate oxidation during exercise. J Appl Physiol 2005; 99:844-850.	1	Fat oxidation	Higher	Relative	Glucose+caffeine		Fasting	Low-Moderate	25–30 years	M		N
Pfeiffer B, Stellingwerff T, Zaltas E, Hodgson AB, Jeukendrup AE. Carbohydrate oxidation from a drink during running compared with cycling exercise. Med Sci Sports Exerc 2011; 43(2): 327-334.	1	Fat oxidation	Higher	Relative	Glucose+Fructose		Fasting	Low-Moderate	30–45 years	M		N
Jentjens RLPG, Moseley L, Waring RH, Harding LK, Jeukendrup AE. Oxidation of combined ingestion of glucose and fructose during exercise. J Appl Physiol 2004; 96: 1277-84.	1	Fat oxidation	Higher	Relative	Glucose+Fructose		Fasting	Low-Moderate	25–30 years	M		N
Jentjens RLPG, Jeukendrup AE. High rates of exogenous carbohydrate oxidation from a mixture of glucose and fructose ingested during prolonged cycling exercise. BJN 2005; 93: 485-492.	1	Fat oxidation	Higher	Relative	Glucose+Fructose		Fasting	Low-Moderate	20–30 years	M		N
Jentjens RLPG, Underwood K, Achten J, Currell K, Mann CH, Jeukendrup AE. Exogenous carbohydrate oxidation rates are elevated after combined ingestion of glucose and fructose during exercise in the heat. J Appl Physiol 2006; 100: 807-816.	1	Fat oxidation	Higher	Relative	Glucose+Fructose		Fasting	Low-Moderate	25–35 years	M		N
Jentjens RLPG, Venables MC, Jeukendrup AE. Oxidation of exogenous glucose, sucrose, and maltose during prolonged cycling exercise. J Appl Physiol 2004; 96:1285-1291.	1	Fat oxidation	Higher	Relative	Glucose+maltose		Fasting	Low-Moderate	25–30 years	M		N
Jentjens RLPG, Shaw C, Birtles T, Waring RH, Harding LK, Jeukendrup AE. Oxidation of combined ingestion of glucose and sucrose during exercise. Metabl Clinical Experimental 2005; (54):610-618.	1	Fat oxidation	Higher	Relative	Glucose+Sucrose		Fasting	Low-Moderate	25–35 years	M		N
Jentjens RLPG, Venables MC, Jeukendrup AE. Oxidation of exogenous glucose, sucrose, and maltose during prolonged cycling exercise. J Appl Physiol 2004; 96:1285-1291.	1	Fat oxidation	Higher	Relative	Glucose+Sucrose		Fasting	Low-Moderate	25–30 years	M		N
Jentjens RLPG, Shaw C, Birtles T, Waring RH, Harding LK, Jeukendrup AE. Oxidation of combined ingestion of glucose and sucrose during exercise. Metabl Clinical Experimental 2005; (54):610-618.	1	Fat oxidation	Higher	Relative	Glucose+Sucrose 17.5%		Fasting	Low-Moderate	25–35 years	M		N
Jentjens RLPG, Achten J, Jeukendrup AE. High oxidation rates from combined carbohydrates ingested during exercise. Med Sci Sports Exerc 2004; 36 (9): 1551-1558.	1	Fat oxidation	Higher	Relative	Glucose+Sucrose+Fructose		Fasting	Low-Moderate	25–30 years	M		N
Achten J, Jentjens RL, Brouns F, Jeukendrup AE. Exogenous oxidation of isomaltulose is lower than that of sucrose during exercise in men. J Nutr 2007; 137:1143-1148.	1	Fat oxidation	Higher	Relative	Isomalutlose		Fasting	Low-Moderate	25–30 years	M		N
Arkinstall MJ, Bruce CR, Nikolopoulos V, Garnham AP, Hawley JA. Effect of carbohydrate ingestion on metabolism during running and cycling. J Appl Physiol 2001; 91: 2125-2134.	1	Fat oxidation	Higher	Relative	Lucozade		Fasting	Low-Moderate	25–35 years	M		N
Arkinstall MJ, Bruce CR, Nikolopoulos V, Garnham AP, Hawley JA. Effect of carbohydrate ingestion on metabolism during running and cycling. J Appl Physiol 2001; 91: 2125-2134.	1	Fat oxidation	Higher	Relative	Lucozade		Fasting	Low-Moderate	25–35 years	M		N
Rowlands DS, Wallis G, Shaw C, Jentjens RLPG, Jeukendrup AE. Glucose polymer molecular weight does not affect exogenous carbohydrate oxidation. Med Sci Sports Exerc 2005; 37(9):1510-1516.	1	Fat oxidation	Higher	Relative	Maltodextrin		Fasting	Low-Moderate	20–40 years	M		N
Rowlands DS, Wallis G, Shaw C, Jentjens RLPG, Jeukendrup AE. Glucose polymer molecular weight does not affect exogenous carbohydrate oxidation. Med Sci Sports Exerc 2005; 37(9):1510-1516.	1	Fat oxidation	Higher	Relative	Maltodextrin		Fasting	Low-Moderate	20–40 years	M		N
Wallis G, Rowlands DS, Shaw C, Jentjens RLPG, Jeukendrup AE. Oxidation of combined ingestion of maltodextrins and fructose during exercise. Med Sci Sports Exerc 2005; 37(3): 426-432.	1	Fat oxidation	Higher	Relative	Maltodextrin		Fasting	Low-Moderate	25–30 years	M		N
Wallis G, Rowlands DS, Shaw C, Jentjens RLPG, Jeukendrup AE. Oxidation of combined ingestion of maltodextrins and fructose during exercise. Med Sci Sports Exerc 2005; 37(3): 426-432.	1	Fat oxidation	Higher	Relative	Maltodextrin+Fructose		Fasting	Low-Moderate	25–30 years	M		N
Venables MC, Brouns F, Jeukendrup AE. Oxidation of maltose and trehalose during prolonged moderate-intensity exercise. Med Sci Sports Exerc 2008; 40 (9):1653-1659.	1	Fat oxidation	Higher	Relative	Maltose		Fasting	Low-Moderate	25–35 years	M		N
Kirwan JP, O'Gorman DJ, Evans WJ. A moderate glycemic meal before endurance exercise can enhance performance. J Apply Physiol 1998; 84(1): 53-59.	1	Fat oxidation	Higher	Relative	Oat flour+water		Fasting	Low-Moderate	20–25 years		F	N
Kirwan JP, O'Gorman DJ, Cyr-Campbell D, Campbell WW, Yaraksheski KE, Evans W. Effects of a moderate glycemic meal on exercise duration and substrate utilization. Med Sci Sports Exerc 2001; 33(9): 1517-1523.	1	Fat oxidation	Higher	Relative	Oats+water		Fasting	Low-Moderate	20–30 years		F	N
Jentjens RLPG, Shaw C, Birtles T, Waring RH, Harding LK, Jeukendrup AE. Oxidation of combined ingestion of glucose and sucrose during exercise. Metabl Clinical Experimental 2005; (54):610-618.	1	Fat oxidation	Higher	Relative	Sucrose 8.7		Fasting	Low-Moderate	25–35 years	M		N
Achten J, Jentjens RL, Brouns F, Jeukendrup AE. Exogenous oxidation of isomaltulose is lower than that of sucrose during exercise in men. J Nutr 2007; 137:1143-1148.	1	Fat oxidation	Higher	Relative	Sugar		Fasting	Low-Moderate	25–30 years	M		N
Kirwan JP, O'Gorman DJ, Evans WJ. A moderate glycemic meal before endurance exercise can enhance performance. J Apply Physiol 1998; 84(1): 53-59.	1	Fat oxidation	Higher	Relative	Sweet oats+water		Fasting	Low-Moderate	20–25 years		F	N
Brown CM, Dulloo AG, Yepuri G, Montani JP. Fructose ingestion acutely elevates blood pressure in healthy young humans. Am J Physiol Regulatory Integr Comp Physiol 2008; 294: R730-R737.	1	Fat oxidation	Higher	Relative	Fructose		Fasting	Rest	21–33 years	M	F	N
Brown CM, Dulloo AG, Yepuri G, Montani JP. Fructose ingestion acutely elevates blood pressure in healthy young humans. Am J Physiol Regulatory Integr Comp Physiol 2008; 294: R730-R737.	1	Fat oxidation	Higher	Relative	Glucose		Fasting	Rest	21–33 years	M	F	N
De Jonge L, Agoues I, Garrel DR. Decreased thermogenic response to food with intragastric vs oral feeding. Am J Physiol 1991; 260: E238-E242.	1	Fat oxidation	Higher	Relative	Milk		Fasting	Rest	20–30 years	M	F	N
De Jonge L, Agoues I, Garrel DR. Decreased thermogenic response to food with intragastric vs oral feeding. Am J Physiol 1991; 260: E238-E242.	1	Fat oxidation	Higher	Relative	Orange juice		Fasting	Rest	20–30 years	M	F	N
Sharief NN, Macdonald I. Differences in dietary induced thermogenesis with various carbohydrates in normal and overweight men. Am J Clin Nutr 1982; 35: 267-272.	1	Fat oxidation	Higher	Relative	Sucrose		Fasting	Rest	Adult	M		N
Sharief NN, Macdonald I. Differences in dietary induced thermogenesis with various carbohydrates in normal and overweight men. Am J Clin Nutr 1982; 35: 267-272.	1	Fat oxidation	Higher	Relative	Sucrose		Fasting	Rest	Adult	M		N
Levine L, Evans WJ, Cadarette BS, Fisher EC, Bullen BA. Fructose and glucose ingestion and muscle glycogen use during submaximal exercise. J Appl Physiol 1983; 55(6):1767-1771.	1	Fat oxidation	Higher	Relative	Fructose		Fed	High	20–30 years	M	F	N
Levine L, Evans WJ, Cadarette BS, Fisher EC, Bullen BA. Fructose and glucose ingestion and muscle glycogen use during submaximal exercise. J Appl Physiol 1983; 55(6):1767-1771.	1	Fat oxidation	Higher	Relative	Glucose		Fed	High	20–30 years	M	F	N
Massicotte D, Peronnet F, Allah C, Hillaire-Marcel C, Ledoux M, Brisson G. Metabolic response to [13C] glucose and [13C]fructose ingestion during exercise. J Appl Physiol 1986; 61(3): 1180-1184.	1	Fat oxidation	Higher	Relative	Fructose		Fed	Low-Moderate	20–25 years	M
Adopo E, Peronnet F, Massicotte D, Brisson GR, Hillaire-Marcel C. Respective oxidation of exogenous glucose and fructose given in the same drink during exercise. J Appl Physiol 1994; 76(3):1014-1019.	1	Fat oxidation	Higher	Relative	Fructose 100		Fed	Low-Moderate	20–30 years	M		N
Adopo E, Peronnet F, Massicotte D, Brisson GR, Hillaire-Marcel C. Respective oxidation of exogenous glucose and fructose given in the same drink during exercise. J Appl Physiol 1994; 76(3):1014-1019.	1	Fat oxidation	Higher	Relative	Fructose 50		Fed	Low-Moderate	20–30 years	M		N
Del Coso J, Estevez E, Mora-Rodriguez R. Caffeine effects on short-term performance during prolonged exercise in the heat. Med Sci Sports Exerc 2008; 40(4):744-751.	1	Fat oxidation	Higher	Relative	Gatorade		Fed	Low-Moderate	25–30 years	M		N
Del Coso J, Estevez E, Mora-Rodriguez R. Caffeine effects on short-term performance during prolonged exercise in the heat. Med Sci Sports Exerc 2008; 40(4):744-751.	1	Fat oxidation	Higher	Relative	Gatorade+caffeine		Fed	Low-Moderate	25–30 years	M		N
Wallis G, Dawson R, Achten J, Webber J, Jeukendrup AE. Metabolic response to carbohydrate ingestion during exercise in males and females. Am J Physiol Endocrinol Metab 2006; 290: E708-E715.	1	Fat oxidation	Higher	Relative	Glucose		Fed	Low-Moderate	20–40 years	M	F	N
Massicotte D, Peronnet F, Allah C, Hillaire-Marcel C, Ledoux M, Brisson G. Metabolic response to [13C] glucose and [13C]fructose ingestion during exercise. J Appl Physiol 1986; 61(3): 1180-1184.	1	Fat oxidation	Higher	Relative	Glucose		Fed	Low-Moderate	20–25 years	M		N
Massicotte D, Peronnet F, Adopo E, Brisson GR, Hillaire-Marcel C. Metabolic availability of oral glucose during exercise: a reassessment. Metabolism 1992; 41(12): 1284-1290.	1	Fat oxidation	Higher	Relative	Glucose		Fed	Low-Moderate	20–25 years	M		N
Jentjens RLPG, Underwood K, Achten J, Currell K, Mann CH, Jeukendrup AE. Exogenous carbohydrate oxidation rates are elevated after combined ingestion of glucose and fructose during exercise in the heat. J Appl Physiol 2006; 100: 807-816.	1	Fat oxidation	Higher	Relative	Glucose		Fed	Low-Moderate	25–35 years	M		N
Adopo E, Peronnet F, Massicotte D, Brisson GR, Hillaire-Marcel C. Respective oxidation of exogenous glucose and fructose given in the same drink during exercise. J Appl Physiol 1994; 76(3):1014-1019.	1	Fat oxidation	Higher	Relative	Glucose 100		Fed	Low-Moderate	20–30 years	M		N
Jeukendrup AE, Wagenmakers AJM, Stegen JHCH, Gijsen AP, Brouns F, Saris WHM. Carbohydrate ingestion can completely suppress endogenous glucose production during exercise. Am J Physiol 1999; 276 (39): E672-E683.	1	Fat oxidation	Higher	Relative	Glucose 22% solution		Fed	Low-Moderate	20–22 years			N
Jeukendrup AE, Wagenmakers AJM, Stegen JHCH, Gijsen AP, Brouns F, Saris WHM. Carbohydrate ingestion can completely suppress endogenous glucose production during exercise. Am J Physiol 1999; 276 (39): E672-E683.	1	Fat oxidation	Higher	Relative	Glucose 4% solution		Fed	Low-Moderate	20–22 years			N
Adopo E, Peronnet F, Massicotte D, Brisson GR, Hillaire-Marcel C. Respective oxidation of exogenous glucose and fructose given in the same drink during exercise. J Appl Physiol 1994; 76(3):1014-1019.	1	Fat oxidation	Higher	Relative	Glucose 50		Fed	Low-Moderate	20–30 years	M		N
Adopo E, Peronnet F, Massicotte D, Brisson GR, Hillaire-Marcel C. Respective oxidation of exogenous glucose and fructose given in the same drink during exercise. J Appl Physiol 1994; 76(3):1014-1019.	1	Fat oxidation	Higher	Relative	Glucose 50+ Fructose 50		Fed	Low-Moderate	20–30 years	M		N
Wagenmakers AJM, Brouns F, Saris WHM, Halliday D. Oxidation rates of orally ingested carbohydrates during prolonged exercise in men. J Appl Physiol 1993; 75(6):2774-2780.	1	Fat oxidation	Higher	Relative	Maltodextrin 12%		Fed	Low-Moderate	20–30 years	M		N
Wagenmakers AJM, Brouns F, Saris WHM, Halliday D. Oxidation rates of orally ingested carbohydrates during prolonged exercise in men. J Appl Physiol 1993; 75(6):2774-2780.	1	Fat oxidation	Higher	Relative	Maltodextrin 16%		Fed	Low-Moderate	20–30 years	M		N
Wagenmakers AJM, Brouns F, Saris WHM, Halliday D. Oxidation rates of orally ingested carbohydrates during prolonged exercise in men. J Appl Physiol 1993; 75(6):2774-2780.	1	Fat oxidation	Higher	Relative	Maltodextrin 4%		Fed	Low-Moderate	20–30 years	M		N
Stookey J, Hamer J, Espinoza G, Higa A, Ng V, Tinajero-Deck L, Havel P, King J. Orange juice limits postprandial fat oxidation after breakfast in normal weight adolescents and adults. Adv Nutr 2012; 3: 629S-635S.	1	Fat oxidation	Higher	Relative	Orange juice		Fed	Rest	11–17 years	M	F	N
Stookey J, Hamer J, Espinoza G, Higa A, Ng V, Tinajero-Deck L, Havel P, King J. Orange juice limits postprandial fat oxidation after breakfast in normal weight adolescents and adults. Adv Nutr 2012; 3: 629S-635S.	1	Fat oxidation	Higher	Relative	Orange juice		Fed	Rest	19–38 years	M	F	N
Below PR, Mora-Rodriguez R, Gonzalez-Alonzo J, Coyle EF. Fluid and carbohydrate ingestion independently improve performance during 1h of intense exercise. Med Sci Sports Exerc 1995; 27(2):200-210.	0	Fat oxidation	Same	Absolute	200		Fasting	High	20–25 years	M		N
Below PR, Mora-Rodriguez R, Gonzalez-Alonzo J, Coyle EF. Fluid and carbohydrate ingestion independently improve performance during 1h of intense exercise. Med Sci Sports Exerc 1995; 27(2):200-210.	0	Fat oxidation	Same	Relative	Electrolyte placebo		Fasting	High	20–25 years	M		N
Below PR, Mora-Rodriguez R, Gonzalez-Alonzo J, Coyle EF. Fluid and carbohydrate ingestion independently improve performance during 1h of intense exercise. Med Sci Sports Exerc 1995; 27(2):200-210.	0	Fat oxidation	Same	Relative	Gatorade 6%		Fasting	High	20–25 years	M		N
Hargreaves M, Costill DL, Fink WJ, King DS, Fielding RA. Effect of pre-exercise carbohydrate feedings on endurance cycling performance. Med Sci Sports Exerc 1987; 19 (1) 33-36.	0	Fat oxidation	Same	Relative	Glucose		Fasting	High	20–22 years	M		N
Wright DA, Sherman WM, Dernbach AR. Carbohydrate feedings before, during or in combination improve cycling endurance performance. J Appl Physiol 1991; 71(3): 1082-1088.	0	Fat oxidation	Same	Relative	Glucose+Fructose during exercise		Fasting	High	20–30 years	M	F	N
Wright DA, Sherman WM, Dernbach AR. Carbohydrate feedings before, during or in combination improve cycling endurance performance. J Appl Physiol 1991; 71(3): 1082-1088.	0	Fat oxidation	Same	Relative	Glucose+Sucrose before exercise		Fasting	High	20–30 years	M	F	N
Wright DA, Sherman WM, Dernbach AR. Carbohydrate feedings before, during or in combination improve cycling endurance performance. J Appl Physiol 1991; 71(3): 1082-1088.	0	Fat oxidation	Same	Relative	Glucose+Sucrose before exercise + Glucose+Fructose during exercise		Fasting	High	20–30 years	M	F	N
Below PR, Mora-Rodriguez R, Gonzalez-Alonzo J, Coyle EF. Fluid and carbohydrate ingestion independently improve performance during 1h of intense exercise. Med Sci Sports Exerc 1995; 27(2):200-210.	0	Fat oxidation	Same	Relative	Maltodextrin 40%		Fasting	High	20–25 years	M		N
Flynn MG, Costill DL, Hawley JA, Fink WJ, Neufer PD, Fielding RA, Sleeper MD. Influence of selected carbohydrate drinks on cycling performance and glycogen use. Med Sci Sports Exerc 1987; 19(1):37-40.	0	Fat oxidation	Same	Relative	Maltodextrin Fructose		Fasting	High	25	M		N
Flynn MG, Costill DL, Hawley JA, Fink WJ, Neufer PD, Fielding RA, Sleeper MD. Influence of selected carbohydrate drinks on cycling performance and glycogen use. Med Sci Sports Exerc 1987; 19(1):37-40.	0	Fat oxidation	Same	Relative	Maltodextrin Glucose		Fasting	High	25	M		N
Flynn MG, Costill DL, Hawley JA, Fink WJ, Neufer PD, Fielding RA, Sleeper MD. Influence of selected carbohydrate drinks on cycling performance and glycogen use. Med Sci Sports Exerc 1987; 19(1):37-40.	0	Fat oxidation	Same	Relative	Maltodextrin High fructose Corn Syrup		Fasting	High	25	M		N
Fielding RA, Costill DL, Fink WJ, King DS, Kovaleski JE, Kirwan JP. Effects of pre-exercise carbohydrate feedings on muscle glycogen use during exercise in well-trained runners. Eur J Appl Physiol 1987; 56:225-229.	0	Fat oxidation	Same	Relative	Fructose		Fasting	Low-Moderate	20–30 years	M		N
O'Hara JP, Carroll S, Cooke CB, Morrison DJ, Preston T, King RFGJ. Preexercise galactose and glucose ingestion on fuel use during exercise. Med Sci Sports Exerc 2012; 44(10): 1958-1967.	0	Fat oxidation	Same	Relative	Galactose		Fasting	Low-Moderate	25–45 years	M		N
O'Hara JP, Carroll S, Cooke CB, Morrison DJ, Preston T, King RFGJ. Preexercise galactose and glucose ingestion on fuel use during exercise. Med Sci Sports Exerc 2012; 44(10): 1958-1967.	0	Fat oxidation	Same	Relative	Glucose		Fasting	Low-Moderate	25–45 years	M		N
Gleeson M, Maughan RJ, Greenhaff PL. Comparison of the effects of pre-exercise feeding of glucose, glycerol and placebo on endurance and fuel homeostasis in man. Eur J Appl Physiol 1986; 55:645-653.	0	Fat oxidation	Same	Relative	Glycerol		Fasting	Low-Moderate	25–35 years	M		N
Hursel R, Westerterp-Plantenga MS. Consumption of Milk-protein combined with green tea modulates diet-induced thermogenesis. Nutrients 2011; 3: 725-733.	0	Fat oxidation	Same	Relative	Milk		Fasting	Rest	18–60 years	M	F	N,O
McConnell GK, Canny BJ, Daddo MC, Nance MJ, Snow RJ. Effect of carbohydrate ingestion on glucose kinetics and muscle metabolism during intense endurance exercise. J Appl Physiol 2000; 89: 1690-1698.	0	Fat oxidation	Same	Relative	Glucose		Fed	High	24	M		N
Bosch AN, Weltan SM, Dennis SC, Noakes TD. Fuel substrate kinetics of carbohydrate loading differs from that of carbohydrate ingestion during prolonged exercise. Metabolism 1996; 45(4):415-423.	0	Fat oxidation	Same	Relative	Glucose polymer		Fed	High	20–30 years	M		N
Timmons BW, Bar-Or O, Riddell MC. Energy substrate utilization during prolonged exercise with and without carbohydrate intake in preadolescent and adolescent girls. J Appl Physiol 2007; 103: 995-1000.	0	Fat oxidation	Same	Relative	Sucrose+Glucose		Fed	Low-Moderate	14 years		F	N
Hulmi JJ, Volek JS, Selanne H, Mero AA. Protein ingestion prior to strength exercise affects blood hormones and metabolism. Med Sci Sports Exerc 2005; 37(11):1990-1997	0	Fat oxidation	Same	Relative	Whey caseinate		Fed	Rest	20–30 years	M		N
Fritzsche RG, Switzer TW, Hodgkinson BJ, Lee SH, Martin GC, Coyle EF. Water and carbohydrate ingestion during prolonged exercise increase maximal neuromuscular power. J Appl Physiol. 2000; 88: 730-337.	0	Fat oxidation	Higher	Absolute	490		Fasting	Low-Moderate	20–25 years	M		N
Achten J, Jeukendrup AE. The effect of pre-exercise carbohydrate feedings on the intensity that elicits maximal fat oxidation. J Sports Sci 2003; 21: 1017-1024.	0	Fat oxidation	Higher	Relative	Glucose		Fasting	High	20–30 years	M		N
Coggan AR, Coyle EF. Effect of carbohydrate feedings during high intensity exercise. J Appl Physiol 1988; 65(4): 1703-1709.	0	Fat oxidation	Higher	Relative	Glucose+Sucrose		Fasting	High	20–25 years	M		N
Rowlands DS, Wadsworth DP. No effect of protein coingestion on exogenous glucose oxidation during exercise. Med Sci Sports Exerc 2012; 44(4):701-708.	0	Fat oxidation	Higher	Relative	Glucose		Fasting	Low-Moderate	25–35 years	M		N
Sherman WM, Peden MC, Wright DA. Carbohydrate feedings 1h before exercise improves cycling performance. Am J Clin Nutr 1991; 54: 866-870.	0	Fat oxidation	Higher	Relative	Glucose		Fasting	Low-Moderate	20–30 years	M		N
Fielding RA, Costill DL, Fink WJ, King DS, Kovaleski JE, Kirwan JP. Effects of pre-exercise carbohydrate feedings on muscle glycogen use during exercise in well-trained runners. Eur J Appl Physiol 1987; 56:225-229.	0	Fat oxidation	Higher	Relative	Glucose		Fasting	Low-Moderate	20–30 years	M		N
Gleeson M, Maughan RJ, Greenhaff PL. Comparison of the effects of pre-exercise feeding of glucose, glycerol and placebo on endurance and fuel homeostasis in man. Eur J Appl Physiol 1986; 55:645-653.	0	Fat oxidation	Higher	Relative	Glucose		Fasting	Low-Moderate	25–35 years	M		N
Wright DA, Sherman WM, Dernbach AR. Carbohydrate feedings before, during or in combination improve cycling endurance performance. J Appl Physiol 1991; 71(3): 1082-1088.	0	Fat oxidation	Higher	Relative	Glucose+Fructose during exercise		Fasting	Low-Moderate	20–30 years	M	F	N
Sherman WM, Peden MC, Wright DA. Carbohydrate feedings 1h before exercise improves cycling performance. Am J Clin Nutr 1991; 54: 866-870.	0	Fat oxidation	Higher	Relative	Glucose+Maltodextrin		Fasting	Low-Moderate	20–30 years	M		N
Rowlands DS, Wadsworth DP. No effect of protein coingestion on exogenous glucose oxidation during exercise. Med Sci Sports Exerc 2012; 44(4):701-708.	0	Fat oxidation	Higher	Relative	Glucose+Milk protein		Fasting	Low-Moderate	25–35 years	M		N
Coggan AR, Coyle EF. Reversal of fatigue during prolonged exercise by carbohydrate infusion or ingestion. J Appl Physiol 1987; 63(6): 2388-2395.	0	Fat oxidation	Higher	Relative	Glucose+Sucrose		Fasting	Low-Moderate	20–30 years	M		N
Coggan AR, Coyle EF. Effect of carbohydrate feedings during high intensity exercise. J Appl Physiol 1988; 65(4): 1703-1709.	0	Fat oxidation	Higher	Relative	Glucose+Sucrose		Fasting	Low-Moderate	20–25 years	M		N
Wright DA, Sherman WM, Dernbach AR. Carbohydrate feedings before, during or in combination improve cycling endurance performance. J Appl Physiol 1991; 71(3): 1082-1088.	0	Fat oxidation	Higher	Relative	Glucose+Sucrose before exercise		Fasting	Low-Moderate	20–30 years	M	F	N
Wright DA, Sherman WM, Dernbach AR. Carbohydrate feedings before, during or in combination improve cycling endurance performance. J Appl Physiol 1991; 71(3): 1082-1088.	0	Fat oxidation	Higher	Relative	Glucose+Sucrose before exercise + Glucose+Fructose during exercise		Fasting	Low-Moderate	20–30 years	M	F	N
Febbraio MA, Steward KL. CHO feeding before prolonged exercise: effect of glycemic index on muscle glycogenolysis and exercise performance. J Appl Physiol 1996; 81:1115-1120.	0	Fat oxidation	Higher	Relative	Lentils		Fasting	Low-Moderate	25–35 years	M		N
Clarke ND, Drust B, Maclaren DPM, Reilly T. Fluid provision and metabolic responses to soccer-specific exercise. Eur J Appl Physiol 2008; 104: 1069-1077.	0	Fat oxidation	Higher	Relative	Lucozade, larger bolus		Fasting	Low-Moderate	20–25 years	M		N
Clarke ND, Drust B, Maclaren DPM, Reilly T. Fluid provision and metabolic responses to soccer-specific exercise. Eur J Appl Physiol 2008; 104: 1069-1077.	0	Fat oxidation	Higher	Relative	Lucozade, smaller bolus more frequent		Fasting	Low-Moderate	20–25 years	M		N
Roberts JD, Tarpey MD, Kass LS, Tarpey RJ, Roberts MG. Assessing a commercially available sports drink on exogenous carbohydrate oxidation, fluid delivery and sustained exercise performance. J Int Soc Sports Nutr 2014; 11: 8	0	Fat oxidation	Higher	Relative	Maltodextrin		Fasting	Low-Moderate	20–40 years	M		N
Roberts JD, Tarpey MD, Kass LS, Tarpey RJ, Roberts MG. Assessing a commercially available sports drink on exogenous carbohydrate oxidation, fluid delivery and sustained exercise performance. J Int Soc Sports Nutr 2014; 11: 8	0	Fat oxidation	Higher	Relative	Maltodextrin+Fructose		Fasting	Low-Moderate	20–40 years	M		N
Febbraio MA, Steward KL. CHO feeding before prolonged exercise: effect of glycemic index on muscle glycogenolysis and exercise performance. J Appl Physiol 1996; 81:1115-1120.	0	Fat oxidation	Higher	Relative	Mashed potato		Fasting	Low-Moderate	25–35 years	M		N
Fritzsche RG, Switzer TW, Hodgkinson BJ, Lee SH, Martin GC, Coyle EF. Water and carbohydrate ingestion during prolonged exercise increase maximal neuromuscular power. J Appl Physiol. 2000; 88: 730-337.	0	Fat oxidation	Higher	Relative	Sucrose+Glucose		Fasting	Low-Moderate	20–25 years	M		N
Fritzsche RG, Switzer TW, Hodgkinson BJ, Lee SH, Martin GC, Coyle EF. Water and carbohydrate ingestion during prolonged exercise increase maximal neuromuscular power. J Appl Physiol. 2000; 88: 730-337.	0	Fat oxidation	Higher	Relative	Sucrose+Glucose		Fasting	Low-Moderate	20–25 years	M		N
Sherman WM, Brodowicz G, Wright DA, Allen WK, Simonsen J, Dernbach A. Effects of 4h preexercise carbohydrate feedings on cycling performance. Med Sci Sports Exerc 1989; 21(5): 598-604.	0	Fat oxidation	Higher	Relative	Sucrose+Maltodextrin		Fasting	Low-Moderate	25–35 years	M	F	N
Mitchell JB, Costill DL, Houmard JA, Fink WJ, Pascoe DD, Pearson DR. Influence of carbohydrate dosage on exercise performance and glycogen metabolism. J Appl Physiol 1989; 67(5): 1843-1849.	0	Fat oxidation	Higher	Relative	Glucose+Fructose 12% solution		Fed	High	20–30 years	M		N
Mitchell JB, Costill DL, Houmard JA, Fink WJ, Pascoe DD, Pearson DR. Influence of carbohydrate dosage on exercise performance and glycogen metabolism. J Appl Physiol 1989; 67(5): 1843-1849.	0	Fat oxidation	Higher	Relative	Glucose+Fructose 12% solution		Fed	High	20–30 years	M		N
Mitchell JB, Costill DL, Houmard JA, Fink WJ, Pascoe DD, Pearson DR. Influence of carbohydrate dosage on exercise performance and glycogen metabolism. J Appl Physiol 1989; 67(5): 1843-1849.	0	Fat oxidation	Higher	Relative	Glucose+Fructose 18% solution		Fed	High	20–30 years	M		N
Mitchell JB, Costill DL, Houmard JA, Fink WJ, Pascoe DD, Pearson DR. Influence of carbohydrate dosage on exercise performance and glycogen metabolism. J Appl Physiol 1989; 67(5): 1843-1849.	0	Fat oxidation	Higher	Relative	Glucose+Fructose 18% solution		Fed	High	20–30 years	M		N
Mitchell JB, Costill DL, Houmard JA, Fink WJ, Pascoe DD, Pearson DR. Influence of carbohydrate dosage on exercise performance and glycogen metabolism. J Appl Physiol 1989; 67(5): 1843-1849.	0	Fat oxidation	Higher	Relative	Glucose+Sucrose 6% solution		Fed	High	20–30 years	M		N
Mitchell JB, Costill DL, Houmard JA, Fink WJ, Pascoe DD, Pearson DR. Influence of carbohydrate dosage on exercise performance and glycogen metabolism. J Appl Physiol 1989; 67(5): 1843-1849.	0	Fat oxidation	Higher	Relative	Glucose+Sucrose 6% solution		Fed	High	20–30 years	M		N
Blacker SD, Williams NC, Fallowfield JL, Willems MET. The effect of a carbohydrate beverage on the physiological responses during prolonged load carriage. Eur J Appl Physiol 2011; 111: 1901-1908.	0	Fat oxidation	Higher	Relative	Glucose		Fed	Low-Moderate	25–35 years	M		N
Chu L, Riddell MC, Takken T, Timmons BW. Carbohydrate intake reduces fat oxidation during exercise in obese boys. Eur J Appl Physiol 2011; 111: 3135-3141.	0	Fat oxidation	Higher	Relative	Glucose		Fed	Low-Moderate	9–12 years	M		O
Bilzon JLJ, Murphy JL, Allsopp AJ, Wootton SA, Williams C. Influence of glucose ingestion by humans during recovery from exercise on substrate utilisation during subsequent exercise in a warm environment. Eur J Appl Physiol 2002; 87: 318-326.	0	Fat oxidation	Higher	Relative	Glucose		Fed	Low-Moderate	30–35 years	M		N
Riddell MC, Bar-Or O, Wilk B, Parolin ML, Heigenhauser GJF. Substrate utilization during exercise with glucose and glucose plus fructose ingestion in boys ages 10-14yr. J Appl Physiol 2001; 90:903-911.	0	Fat oxidation	Higher	Relative	Glucose		Fed	Low-Moderate	11–14 years	M		N
Campbell SE, Angus DJ, Febbraio MA. Glucose kinetics and exercise performance during phases of the menstrual cycle: effect of glucose ingestion. Am J Physiol Endocrinol Metab 2001; 281: E817-E825.	0	Fat oxidation	Higher	Relative	Glucose in follicular phase		Fed	Low-Moderate	20–30 years		F	N
Campbell SE, Angus DJ, Febbraio MA. Glucose kinetics and exercise performance during phases of the menstrual cycle: effect of glucose ingestion. Am J Physiol Endocrinol Metab 2001; 281: E817-E825.	0	Fat oxidation	Higher	Relative	Glucose in luteal phase		Fed	Low-Moderate	20–30 years		F	N
Riddell MC, Bar-Or O, Wilk B, Parolin ML, Heigenhauser GJF. Substrate utilization during exercise with glucose and glucose plus fructose ingestion in boys ages 10-14yr. J Appl Physiol 2001; 90:903-911.	0	Fat oxidation	Higher	Relative	Glucose+Fructose		Fed	Low-Moderate	11–14 years	M		N
Febbraio MA, Chiu A, Angus DJ, Arkinstall MJ, Hawley JA. Effects of carbohydrate ingestion before and during exercise on glucose kinetics and performance. J Appl Physiol 2000; 89: 2220-2226.	0	Fat oxidation	Higher	Relative	Lucozade before, during		Fed	Low-Moderate	20–35 years	M		N
Febbraio MA, Chiu A, Angus DJ, Arkinstall MJ, Hawley JA. Effects of carbohydrate ingestion before and during exercise on glucose kinetics and performance. J Appl Physiol 2000; 89: 2220-2226.	0	Fat oxidation	Higher	Relative	Lucozade before, not during		Fed	Low-Moderate	20–35 years	M		N
Febbraio MA, Chiu A, Angus DJ, Arkinstall MJ, Hawley JA. Effects of carbohydrate ingestion before and during exercise on glucose kinetics and performance. J Appl Physiol 2000; 89: 2220-2226.	0	Fat oxidation	Higher	Relative	Lucozade not before, during		Fed	Low-Moderate	20–35 years	M		N
Murray R, Seifert JG, Eddy DE, Paul GL, Halaby GA. Carbohydrate feeding and exercise: effect of beverage carbohydrate content.Eur J Appl Physiol 1989; 59:152-158.	0	Fat oxidation	Higher	Relative	Sucrose 10%		Fed	Low-Moderate	25–35 years	M		N
Murray R, Seifert JG, Eddy DE, Paul GL, Halaby GA. Carbohydrate feeding and exercise: effect of beverage carbohydrate content.Eur J Appl Physiol 1989; 59:152-158.	0	Fat oxidation	Higher	Relative	Sucrose 6%		Fed	Low-Moderate	25–35 years	M		N
Murray R, Seifert JG, Eddy DE, Paul GL, Halaby GA. Carbohydrate feeding and exercise: effect of beverage carbohydrate content.Eur J Appl Physiol 1989; 59:152-158.	0	Fat oxidation	Higher	Relative	Sucrose 8%		Fed	Low-Moderate	25–35 years	M		N
Timmons BW, Bar-Or O, Riddell MC. Influence of age and pubertal status on substrate utilization during exercise with and without carbohydrate intake in healthy boys. Appl Physiol Nutr Metab. 2007; 32: 416-425.	0	Fat oxidation	Higher	Relative	Sucrose+Glucose		Fed	Low-Moderate	12 years	M		N
Timmons BW, Bar-Or O, Riddell MC. Influence of age and pubertal status on substrate utilization during exercise with and without carbohydrate intake in healthy boys. Appl Physiol Nutr Metab. 2007; 32: 416-425.	0	Fat oxidation	Higher	Relative	Sucrose+Glucose		Fed	Low-Moderate	14 years	M		N
Timmons BW, Bar-Or O, Riddell MC. Oxidation rate of exogenous carbohydrate during exercise is higher in boys than in men. Appl Physiol Nutr Metab. 2003; 94: 278-284.	0	Fat oxidation	Higher	Relative	Sucrose+Glucose		Fed	Low-Moderate	9 years	M		N
Timmons BW, Bar-Or O, Riddell MC. Oxidation rate of exogenous carbohydrate during exercise is higher in boys than in men. Appl Physiol Nutr Metab. 2003; 94: 278-284.	0	Fat oxidation	Higher	Relative	Sucrose+Glucose		Fed	Low-Moderate	22 years	M		N
Timmons BW, Bar-Or O, Riddell MC. Energy substrate utilization during prolonged exercise with and without carbohydrate intake in preadolescent and adolescent girls. J Appl Physiol 2007; 103: 995-1000.	0	Fat oxidation	Higher	Relative	Sucrose+Glucose		Fed	Low-Moderate	12 years		F	N
Bilzon JLJ, Murphy JL, Allsopp AJ, Wootton SA, Williams C. Influence of glucose ingestion by humans during recovery from exercise on substrate utilisation during subsequent exercise in a warm environment. Eur J Appl Physiol 2002; 87: 318-326.	0	Fat oxidation	Higher	Relative	Glucose		Fed	Rest	30–35 years	M		N

## Sheet: Weight change
Appendix for: Negative, Null, and Beneficial Effects of Drinking Water on Energy Intake, Energy Expenditure, Fat Oxidation, and Weight Change in Randomized Trials: A Qualitative Review Jodi JD Stookey
Reference	Plain water	Outcome	Single comp. RCT	Drinking water effect	Drinking water exposure	Reference drink	Drink volume	Diet condition	Exercise	Male	Female	Weight status
Peters, J.C.; Wyatt, H.R.; Foster, G.D.; Pan, Z.; Wojtanowski, A.C.; Vander Veur, S.S.; Herring, S.J.; Brill, C.; Hill, J.O. The effects of water and non-nutritive sweetened beverages on weight loss during a 12-week weight loss treatment program. Obesity 2014, 22, 1415–1421.	1	3-mo % losing>5% of body wt	1	Less loss	Relative	Diet cola	>24 oz/d	Restricted	increase	M	F	O
Peters, J.C.; Wyatt, H.R.; Foster, G.D.; Pan, Z.; Wojtanowski, A.C.; Vander Veur, S.S.; Herring, S.J.; Brill, C.; Hill, J.O. The effects of water and non-nutritive sweetened beverages on weight loss during a 12-week weight loss treatment program. Obesity 2014, 22, 1415–1421.	1	3-mo kg chg	1	Less loss	Relative	Diet cola	>24 oz/d	Restricted	increase	M	F	O
Muckelbauer R, Libuda L, Clausen K, Reinehr T, Kersting M. A simple dietary intervention in the school setting decreased incidence of overweight in children. Obes Facts. 2009;2(5):282-5. doi: 10.1159/000229783. Epub 2009 Aug 14.	1	1-sch year BMI-z chg	1	No effect	Absolute	No am drink	+1 glass/d	Usual	Usual	M	F	N & O
Dennis EA, Dengo AL, Comber DL, Flack KD, Savla J, Davy KP, Davy BM. Water consumption increases weight loss during a hypocaloric diet intervention in middle-aged and older adults. Obesity (Silver Spring). 2010 Feb;18(2):300-7. doi: 10.1038/oby.2009.235. Epub 2009 Aug 6.	1	3-mo BMI	1	No effect	Absolute	Less volume	1.5L/d	Restricted	Usual	M	F	O
Stookey JD, Del Toro R, Hamer J, Medina A, Higa A, Ng V, TinajeroDeck L, Juarez L. Qualitative and/or quantitative drinking water recommendations for pediatric obesity treatment. J Obes Weight Loss Ther. 2014 Oct 11;4(4):232.	1	8 week kg chg	1	No effect	Absolute	Less volume	Follow thirst, Usual: 1.6L/d total water, incl. 256g/d SSB	Restricted GI	Usual	M	F	O
Maersk M, Belza A, Stødkilde-Jørgensen H, Ringgaard S, Chabanova E, Thomsen H, Pedersen SB, Astrup A, Richelsen B. Sucrose-sweetened beverages increase fat storage in the liver, muscle, and visceral fat depot: a 6-mo randomized intervention study. Am J Clin Nutr. 2012 Feb;95(2):283-9. doi: 10.3945/ajcn.111.022533. Epub 2011 Dec 28.	1	6-mo total fat mass, chg	1	No effect	Relative	Cola	1L	Usual	Usual	M	F	O
Maersk M, Belza A, Stødkilde-Jørgensen H, Ringgaard S, Chabanova E, Thomsen H, Pedersen SB, Astrup A, Richelsen B. Sucrose-sweetened beverages increase fat storage in the liver, muscle, and visceral fat depot: a 6-mo randomized intervention study. Am J Clin Nutr. 2012 Feb;95(2):283-9. doi: 10.3945/ajcn.111.022533. Epub 2011 Dec 28.	1	6-mo kg, chg	1	No effect	Relative	Cola	1L	Usual	Usual	M	F	O
Maersk M, Belza A, Stødkilde-Jørgensen H, Ringgaard S, Chabanova E, Thomsen H, Pedersen SB, Astrup A, Richelsen B. Sucrose-sweetened beverages increase fat storage in the liver, muscle, and visceral fat depot: a 6-mo randomized intervention study. Am J Clin Nutr. 2012 Feb;95(2):283-9. doi: 10.3945/ajcn.111.022533. Epub 2011 Dec 28.	1	6-mo total fat mass, chg	1	No effect	Relative	Milk, Semi-skim	1L	Usual	Usual	M	F	O
Maersk M, Belza A, Stødkilde-Jørgensen H, Ringgaard S, Chabanova E, Thomsen H, Pedersen SB, Astrup A, Richelsen B. Sucrose-sweetened beverages increase fat storage in the liver, muscle, and visceral fat depot: a 6-mo randomized intervention study. Am J Clin Nutr. 2012 Feb;95(2):283-9. doi: 10.3945/ajcn.111.022533. Epub 2011 Dec 28.	1	6-mo kg, chg	1	No effect	Relative	Milk, Semi-skim	1L	Usual	Usual	M	F	O
Wedick NM, Brennan AM, Sun Q, Hu FB, Mantzoros CS, van Dam RM. Effects of caffeinated and decaffeinated coffee on biological risk factors for type 2 diabetes: a randomized controlled trial. Nutr J. 2011 Sep 13;10:93. doi: 10.1186/1475-2891-10-93.	1	2-mo BMI	1	No effect	Relative	Non-caloric (caffeinated coffee)	5 cups (885 ml)	Usual	Usual	M	F	O
Wedick NM, Brennan AM, Sun Q, Hu FB, Mantzoros CS, van Dam RM. Effects of caffeinated and decaffeinated coffee on biological risk factors for type 2 diabetes: a randomized controlled trial. Nutr J. 2011 Sep 13;10:93. doi: 10.1186/1475-2891-10-93.	1	2-mo kg	1	No effect	Relative	Non-caloric (caffeinated coffee)	5 cups (885 ml)	Usual	Usual	M	F	O
Wedick NM, Brennan AM, Sun Q, Hu FB, Mantzoros CS, van Dam RM. Effects of caffeinated and decaffeinated coffee on biological risk factors for type 2 diabetes: a randomized controlled trial. Nutr J. 2011 Sep 13;10:93. doi: 10.1186/1475-2891-10-93.	1	2-mo BMI	1	No effect	Relative	Non-caloric (decaffeinated coffee)	5 cups (885 ml)	Usual	Usual	M	F	O
Wedick NM, Brennan AM, Sun Q, Hu FB, Mantzoros CS, van Dam RM. Effects of caffeinated and decaffeinated coffee on biological risk factors for type 2 diabetes: a randomized controlled trial. Nutr J. 2011 Sep 13;10:93. doi: 10.1186/1475-2891-10-93.	1	2-mo kg	1	No effect	Relative	Non-caloric (decaffeinated coffee)	5 cups (885 ml)	Usual	Usual	M	F	O
Maersk M, Belza A, Stødkilde-Jørgensen H, Ringgaard S, Chabanova E, Thomsen H, Pedersen SB, Astrup A, Richelsen B. Sucrose-sweetened beverages increase fat storage in the liver, muscle, and visceral fat depot: a 6-mo randomized intervention study. Am J Clin Nutr. 2012 Feb;95(2):283-9. doi: 10.3945/ajcn.111.022533. Epub 2011 Dec 28.	1	6-mo total fat mass, chg	1	No effect	Relative	Non-caloric, Diet cola	1L	Usual	Usual	M	F	O
Maersk M, Belza A, Stødkilde-Jørgensen H, Ringgaard S, Chabanova E, Thomsen H, Pedersen SB, Astrup A, Richelsen B. Sucrose-sweetened beverages increase fat storage in the liver, muscle, and visceral fat depot: a 6-mo randomized intervention study. Am J Clin Nutr. 2012 Feb;95(2):283-9. doi: 10.3945/ajcn.111.022533. Epub 2011 Dec 28.	1	6-mo kg, chg	1	No effect	Relative	Non-caloric, Diet cola	1L	Usual	Usual	M	F	O
Sichieri R, Paula Trotte A, de Souza RA, Veiga GV. School randomised trial on prevention of excessive weight gain by discouraging students from drinking sodas. Public Health Nutr. 2009 Feb;12(2):197-202. doi: 10.1017/S1368980008002644. Epub 2008 Jun 18.	1	mean BMI	1	No effect	Relative	SSB	67ml/d SSB	Usual	Usual	M	F	N & O
Sichieri R, Paula Trotte A, de Souza RA, Veiga GV. School randomised trial on prevention of excessive weight gain by discouraging students from drinking sodas. Public Health Nutr. 2009 Feb;12(2):197-202. doi: 10.1017/S1368980008002644. Epub 2008 Jun 18.	1	% overwt	1	No effect	Relative	SSB	67ml/d SSB	Usual	Usual	M	F	N & O
Sichieri R, Paula Trotte A, de Souza RA, Veiga GV. School randomised trial on prevention of excessive weight gain by discouraging students from drinking sodas. Public Health Nutr. 2009 Feb;12(2):197-202. doi: 10.1017/S1368980008002644. Epub 2008 Jun 18.	1	% obese	1	No effect	Relative	SSB	67ml/d SSB	Usual	Usual	M	F	N & O
Safdie M, Lévesque L, González-Casanova I, Salvo D, Islas A, Hernández-Cordero S, Bonvecchio A, Rivera JA. Promoting healthful diet and physical activity in the Mexican school system for the prevention of obesity in children. Salud Publica Mex. 2013;55 Suppl 3:357-73.	1	7-mo % overweight or obese in 1st year of intervention	1	No effect	Relative	SSB	Usual	Usual	Usual	M	F	N & O
Safdie M, Lévesque L, González-Casanova I, Salvo D, Islas A, Hernández-Cordero S, Bonvecchio A, Rivera JA. Promoting healthful diet and physical activity in the Mexican school system for the prevention of obesity in children. Salud Publica Mex. 2013;55 Suppl 3:357-73.	1	8-mo % overweight or obese in 2nd year of intervention	1	No effect	Relative	SSB	Usual	Usual	Usual	M	F	N & O
James J, Thomas P, Cavan D, Kerr D. Preventing childhood obesity by reducing consumption of carbonated drinks: cluster randomised controlled trial. BMJ. 2004 May 22;328(7450):1237. Epub 2004 Apr 23. Erratum in: BMJ. 2004 May 22;328(7450):1236.	1	12-mo BMI chg	1	No effect	Relative	SSB	1.6-2.2 glasses/3d	Usual	Usual	M	F	N & O
James J, Thomas P, Cavan D, Kerr D. Preventing childhood obesity by reducing consumption of carbonated drinks: cluster randomised controlled trial. BMJ. 2004 May 22;328(7450):1237. Epub 2004 Apr 23. Erratum in: BMJ. 2004 May 22;328(7450):1236.	1	12-mo BMI z score	1	No effect	Relative	SSB	1.6-2.2 glasses/3d	Usual	Usual	M	F	N & O
Ebbeling CB, Feldman HA, Chomitz VR, Antonelli TA, Gortmaker SL, Osganian SK, Ludwig DS. A randomized trial of sugar-sweetened beverages and adolescent body weight. N Engl J Med. 2012 Oct 11;367(15):1407-16. doi: 10.1056/NEJMoa1203388. Epub 2012 Sep 21.	1	24-mo BMI chg	1	No effect	Relative	SSB	2.1L/d SSB+juice to replace	Usual	Usual	M	F	O
Ebbeling CB, Feldman HA, Chomitz VR, Antonelli TA, Gortmaker SL, Osganian SK, Ludwig DS. A randomized trial of sugar-sweetened beverages and adolescent body weight. N Engl J Med. 2012 Oct 11;367(15):1407-16. doi: 10.1056/NEJMoa1203388. Epub 2012 Sep 21.	1	24-mo kg	1	No effect	Relative	SSB	2.1L/d SSB+juice to replace	Usual	Usual	M	F	O
Ebbeling CB, Feldman HA, Chomitz VR, Antonelli TA, Gortmaker SL, Osganian SK, Ludwig DS. A randomized trial of sugar-sweetened beverages and adolescent body weight. N Engl J Med. 2012 Oct 11;367(15):1407-16. doi: 10.1056/NEJMoa1203388. Epub 2012 Sep 21.	1	24-mo BMI chg	1	No effect	Relative	SSB	2.1L/d SSB+juice to replace	Usual	Usual	M	F	O
Ebbeling CB, Feldman HA, Chomitz VR, Antonelli TA, Gortmaker SL, Osganian SK, Ludwig DS. A randomized trial of sugar-sweetened beverages and adolescent body weight. N Engl J Med. 2012 Oct 11;367(15):1407-16. doi: 10.1056/NEJMoa1203388. Epub 2012 Sep 21.	1	24-mo kg	1	No effect	Relative	SSB	2.1L/d SSB+juice to replace	Usual	Usual	M	F	O
Ebbeling CB, Feldman HA, Chomitz VR, Antonelli TA, Gortmaker SL, Osganian SK, Ludwig DS. A randomized trial of sugar-sweetened beverages and adolescent body weight. N Engl J Med. 2012 Oct 11;367(15):1407-16. doi: 10.1056/NEJMoa1203388. Epub 2012 Sep 21.	1	12-mo BMI chg	1	No effect	Relative	SSB	2.1L/d SSB+juice to replace	Usual	Usual	M	F	O
Ebbeling CB, Feldman HA, Chomitz VR, Antonelli TA, Gortmaker SL, Osganian SK, Ludwig DS. A randomized trial of sugar-sweetened beverages and adolescent body weight. N Engl J Med. 2012 Oct 11;367(15):1407-16. doi: 10.1056/NEJMoa1203388. Epub 2012 Sep 21.	1	12-mo kg	1	No effect	Relative	SSB	2.1L/d SSB+juice to replace	Usual	Usual	M	F	O
Ebbeling CB, Feldman HA, Osganian SK, Chomitz VR, Ellenbogen SJ, Ludwig DS. Effects of decreasing sugar-sweetened beverage consumption on body weight in adolescents: a randomized, controlled pilot study. Pediatrics. 2006 Mar;117(3):673-80.	1	25-week BMI	1	No effect	Relative	SSB	838 ml/d SSB to replace	Usual	Usual	M	F	N & O
Tate DF, Turner-McGrievy G, Lyons E, Stevens J, Erickson K, Polzien K, Diamond M, Wang X, Popkin B. Replacing caloric beverages with water or diet beverages for weight loss in adults: main results of the Choose Healthy Options Consciously Everyday (CHOIC	1	6 mo chance of 5% wt loss	1	No effect	Relative	Caloric	2 servings	Restricted	Usual	M	F	O
Tate DF, Turner-McGrievy G, Lyons E, Stevens J, Erickson K, Polzien K, Diamond M, Wang X, Popkin B. Replacing caloric beverages with water or diet beverages for weight loss in adults: main results of the Choose Healthy Options Consciously Everyday (CHOICE) randomized clinical trial. Am J Clin Nutr. 2012 Mar;95(3):555-63. doi: 10.3945/ajcn.111.026278. Epub 2012 Feb 1.	1	3 mo kg chg	1	No effect	Relative	Caloric	2 servings	Restricted	Usual	M	F	O
Tate DF, Turner-McGrievy G, Lyons E, Stevens J, Erickson K, Polzien K, Diamond M, Wang X, Popkin B. Replacing caloric beverages with water or diet beverages for weight loss in adults: main results of the Choose Healthy Options Consciously Everyday (CHOICE) randomized clinical trial. Am J Clin Nutr. 2012 Mar;95(3):555-63. doi: 10.3945/ajcn.111.026278. Epub 2012 Feb 1.	1	6 mo kg chg	1	No effect	Relative	Caloric	2 servings	Restricted	Usual	M	F	O
Tate DF, Turner-McGrievy G, Lyons E, Stevens J, Erickson K, Polzien K, Diamond M, Wang X, Popkin B. Replacing caloric beverages with water or diet beverages for weight loss in adults: main results of the Choose Healthy Options Consciously Everyday (CHOICE) randomized clinical trial. Am J Clin Nutr. 2012 Mar;95(3):555-63. doi: 10.3945/ajcn.111.026278. Epub 2012 Feb 1.	1	6 mo % wt loss	1	No effect	Relative	Caloric	2 servings	Restricted	Usual	M	F	O
Tate DF, Turner-McGrievy G, Lyons E, Stevens J, Erickson K, Polzien K, Diamond M, Wang X, Popkin B. Replacing caloric beverages with water or diet beverages for weight loss in adults: main results of the Choose Healthy Options Consciously Everyday (CHOICE) randomized clinical trial. Am J Clin Nutr. 2012 Mar;95(3):555-63. doi: 10.3945/ajcn.111.026278. Epub 2012 Feb 1.	1	6 mo % wt loss	1	No effect	Relative	Non-caloric, Diet cola	2 servings	Restricted	Usual	M	F	O
Hernández-Cordero S, Barquera S, Rodríguez-Ramírez S, Villanueva-Borbolla MA, González de Cossio T, Dommarco JR, Popkin B. Substituting water for sugar-sweetened beverages reduces circulating triglycerides and the prevalence of metabolic syndrome in obese but not in overweight Mexican women in a randomized controlled trial. J Nutr. 2014 Nov;144(11):1742-52. doi: 10.3945/jn.114.193490. Epub 2014 S…	1	9 mo BMI chg	1	No effect	Relative	SSB	1.1 L/d SSB + 0.7 L/d drinking water	Restricted	Usual		F	O
Hernández-Cordero S, Barquera S, Rodríguez-Ramírez S, Villanueva-Borbolla MA, González de Cossio T, Dommarco JR, Popkin B. Substituting water for sugar-sweetened beverages reduces circulating triglycerides and the prevalence of metabolic syndrome in obese but not in overweight Mexican women in a randomized controlled trial. J Nutr. 2014 Nov;144(11):1742-52. doi: 10.3945/jn.114.193490. Epub 2014 S…	1	9 mo kg chg	1	No effect	Relative	SSB	1.1 L/d SSB + 0.7 L/d drinking water	Restricted	Usual		F	O
Muckelbauer R, Libuda L, Clausen K, Reinehr T, Kersting M. A simple dietary intervention in the school setting decreased incidence of overweight in children. Obes Facts. 2009;2(5):282-5. doi: 10.1159/000229783. Epub 2009 Aug 14.	1	1-sch year % overwt	1	Less gain	Absolute	No am drink	+1 glass/d	Usual	Usual	M	F	N & O
Arnberg K, Mølgaard C, Michaelsen KF, Jensen SM, Trolle E, Larnkjær A. Skim milk, whey, and casein increase body weight and whey and casein increase the plasma C-peptide concentration in overweight adolescents. J Nutr. 2012 Dec;142(12):2083-90. doi: 10.3945/jn.112.161208. Epub 2012 Oct 17.	1	12-week BMI z score	1	Less gain	Relative	Milk, skim	1L	Usual	Usual	M	F	O
Sichieri R, Paula Trotte A, de Souza RA, Veiga GV. School randomised trial on prevention of excessive weight gain by discouraging students from drinking sodas. Public Health Nutr. 2009 Feb;12(2):197-202. doi: 10.1017/S1368980008002644. Epub 2008 Jun 18.	1	mean BMI	1	Less gain	Relative	SSB	67ml/d SSB	Usual	Usual		F	O
James J, Thomas P, Cavan D, Kerr D. Preventing childhood obesity by reducing consumption of carbonated drinks: cluster randomised controlled trial. BMJ. 2004 May 22;328(7450):1237. Epub 2004 Apr 23. Erratum in: BMJ. 2004 May 22;328(7450):1236.	1	12-mo % overwt & obese	1	Less gain	Relative	SSB	1.6-2.2 glasses/3d	Usual	Usual	M	F	N & O
Ebbeling CB, Feldman HA, Chomitz VR, Antonelli TA, Gortmaker SL, Osganian SK, Ludwig DS. A randomized trial of sugar-sweetened beverages and adolescent body weight. N Engl J Med. 2012 Oct 11;367(15):1407-16. doi: 10.1056/NEJMoa1203388. Epub 2012 Sep 21.	1	12-mo BMI chg	1	Less gain	Relative	SSB	2.1L/d SSB+juice to replace	Usual	Usual	M	F	O
Ebbeling CB, Feldman HA, Chomitz VR, Antonelli TA, Gortmaker SL, Osganian SK, Ludwig DS. A randomized trial of sugar-sweetened beverages and adolescent body weight. N Engl J Med. 2012 Oct 11;367(15):1407-16. doi: 10.1056/NEJMoa1203388. Epub 2012 Sep 21.	1	12-mo kg	1	Less gain	Relative	SSB	2.1L/d SSB+juice to replace	Usual	Usual	M	F	O
Ebbeling CB, Feldman HA, Chomitz VR, Antonelli TA, Gortmaker SL, Osganian SK, Ludwig DS. A randomized trial of sugar-sweetened beverages and adolescent body weight. N Engl J Med. 2012 Oct 11;367(15):1407-16. doi: 10.1056/NEJMoa1203388. Epub 2012 Sep 21.	1	24-mo BMI chg	1	Less gain	Relative	SSB	2.1L/d SSB+juice to replace	Usual	Usual	M	F	O
Ebbeling CB, Feldman HA, Chomitz VR, Antonelli TA, Gortmaker SL, Osganian SK, Ludwig DS. A randomized trial of sugar-sweetened beverages and adolescent body weight. N Engl J Med. 2012 Oct 11;367(15):1407-16. doi: 10.1056/NEJMoa1203388. Epub 2012 Sep 21.	1	24-mo kg	1	Less gain	Relative	SSB	2.1L/d SSB+juice to replace	Usual	Usual	M	F	O
Ebbeling CB, Feldman HA, Chomitz VR, Antonelli TA, Gortmaker SL, Osganian SK, Ludwig DS. A randomized trial of sugar-sweetened beverages and adolescent body weight. N Engl J Med. 2012 Oct 11;367(15):1407-16. doi: 10.1056/NEJMoa1203388. Epub 2012 Sep 21.	1	12-mo BMI chg	1	Less gain	Relative	SSB	2.1L/d SSB+juice to replace	Usual	Usual	M	F	O
Ebbeling CB, Feldman HA, Chomitz VR, Antonelli TA, Gortmaker SL, Osganian SK, Ludwig DS. A randomized trial of sugar-sweetened beverages and adolescent body weight. N Engl J Med. 2012 Oct 11;367(15):1407-16. doi: 10.1056/NEJMoa1203388. Epub 2012 Sep 21.	1	12-mo kg	1	Less gain	Relative	SSB	2.1L/d SSB+juice to replace	Usual	Usual	M	F	O
Dennis EA, Dengo AL, Comber DL, Flack KD, Savla J, Davy KP, Davy BM. Water consumption increases weight loss during a hypocaloric diet intervention in middle-aged and older adults. Obesity (Silver Spring). 2010 Feb;18(2):300-7. doi: 10.1038/oby.2009.235. Epub 2009 Aug 6.	1	3-mo total fat kg	1	More loss	Absolute	Less volume	1.5L/d	Restricted	Usual	M	F	O
Akers JD, Cornett RA, Savla JS, Davy KP, Davy BM. Daily self-monitoring of body weight, step count, fruit/vegetable intake, and water consumption: a feasible and effective long-term weight loss maintenance approach. J Acad Nutr Diet. 2012 May;112(5):685-692.e2. doi: 10.1016/j.jand.2012.01.022. Epub 2012 Apr 25.	1	12-mo kg	1	More loss	Absolute	Less volume	1.5L/d	Restricted	increase	M	F	O
Stookey JD, Del Toro R, Hamer J, Medina A, Higa A, Ng V, TinajeroDeck L, Juarez L. Qualitative and/or quantitative drinking water recommendations for pediatric obesity treatment. J Obes Weight Loss Ther. 2014 Oct 11;4(4):232.	1	8 week kg chg	1	More loss	Absolute	Less volume	4 bottles/d (vs. 2 bottles/d in control group)	Restricted		M	F	O
Ebbeling CB, Feldman HA, Osganian SK, Chomitz VR, Ellenbogen SJ, Ludwig DS. Effects of decreasing sugar-sweetened beverage consumption on body weight in adolescents: a randomized, controlled pilot study. Pediatrics. 2006 Mar;117(3):673-80.	1	25-week BMI	1	More loss	Relative	SSB	838 ml/d SSB to replace	Usual		M	F	O
Rosário R, Oliveira B, Araújo A, Lopes O, Padrão P, Moreira A, Teixeira V, Barros R, Pereira B, Moreira P. The impact of an intervention taught by trained teachers on childhood overweight. Int J Environ Res Public Health. 2012 Apr;9(4):1355-67. doi: 10.3390/ijerph9041355. Epub 2012 Apr 16.	1	6-mo % obese chg	0	No effect	Relative	SSB	Usual	Usual	Usual	M	F	O
Rosário R, Oliveira B, Araújo A, Lopes O, Padrão P, Moreira A, Teixeira V, Barros R, Pereira B, Moreira P. The impact of an intervention taught by trained teachers on childhood overweight. Int J Environ Res Public Health. 2012 Apr;9(4):1355-67. doi: 10.3390/ijerph9041355. Epub 2012 Apr 16.	1	6-mo incidence obese	0	No effect	Relative	SSB	Usual	Usual	Usual	M	F	O
Rosário R, Oliveira B, Araújo A, Lopes O, Padrão P, Moreira A, Teixeira V, Barros R, Pereira B, Moreira P. The impact of an intervention taught by trained teachers on childhood overweight. Int J Environ Res Public Health. 2012 Apr;9(4):1355-67. doi: 10.3390/ijerph9041355. Epub 2012 Apr 16.	1	6-mo obesity remission	0	No effect	Relative	SSB	Usual	Usual	Usual	M	F	O
Rosário R, Oliveira B, Araújo A, Lopes O, Padrão P, Moreira A, Teixeira V, Barros R, Pereira B, Moreira P. The impact of an intervention taught by trained teachers on childhood overweight. Int J Environ Res Public Health. 2012 Apr;9(4):1355-67. doi: 10.3390/ijerph9041355. Epub 2012 Apr 16.	1	6-mo overwt remission, back to normal wt	0	No effect	Relative	SSB	Usual	Usual	Usual	M	F	O
Collins et al, 2014 (Lubans et al, 2012). Collins CE, Dewar DL, Schumacher TL, Finn T, Morgan PJ, Lubans DR. 12 month changes in dietary intake of adolescent girls attending schools in low-income communities following the NEAT Girls cluster randomized controlled trial. Appetite. 2014 Feb;73:147-55. doi: 10.1016/j.appet.2013.11.003. Epub 2013 Nov 12. AND Lubans DR, Morgan PJ, Okely AD, Dewar D, Co…	1	12-mo BMI chg	0	No effect	Relative	SSB	Usual	Usual	Usual		F	N & O
Collins et al, 2014 (Lubans et al, 2012). Collins CE, Dewar DL, Schumacher TL, Finn T, Morgan PJ, Lubans DR. 12 month changes in dietary intake of adolescent girls attending schools in low-income communities following the NEAT Girls cluster randomized controlled trial. Appetite. 2014 Feb;73:147-55. doi: 10.1016/j.appet.2013.11.003. Epub 2013 Nov 12. AND Lubans DR, Morgan PJ, Okely AD, Dewar D, Co…	1	12-mo BMI-z chg	0	No effect	Relative	SSB	Usual	Usual	Usual		F	N & O
Klesges RC, Obarzanek E, Kumanyika S, Murray DM, Klesges LM, Relyea GE, Stockton MB, Lanctot JQ, Beech BM, McClanahan BS, Sherrill-Mittleman D, Slawson DL. The Memphis Girls' health Enrichment Multi-site Studies (GEMS): an evaluation of the efficacy of a 2-year obesity prevention program in African American girls. Arch Pediatr Adolesc Med. 2010 Nov;164(11):1007-14. doi: 10.1001/archpediatrics.201…	1	12-mo mean BMI chg	0	No effect	Relative	SSB		Usual	Usual		F	N & O
Klesges RC, Obarzanek E, Kumanyika S, Murray DM, Klesges LM, Relyea GE, Stockton MB, Lanctot JQ, Beech BM, McClanahan BS, Sherrill-Mittleman D, Slawson DL. The Memphis Girls' health Enrichment Multi-site Studies (GEMS): an evaluation of the efficacy of a 2-year obesity prevention program in African American girls. Arch Pediatr Adolesc Med. 2010 Nov;164(11):1007-14. doi: 10.1001/archpediatrics.201…	1	24-mo mean BMI chg	0	No effect	Relative	SSB		Usual	Usual		F	N & O
Beech BM, Klesges RC, Kumanyika SK, Murray DM, Klesges L, McClanahan B, Slawson D, Nunnally C, Rochon J, McLain-Allen B, Pree-Cary J. Child- and parent-targeted interventions: the Memphis GEMS pilot study. Ethn Dis. 2003 Winter;13(1 Suppl 1):S40-53.	1	12-week mean BMI chg	0	No effect	Relative	SSB		Usual	Usual		F	N & O
Beech BM, Klesges RC, Kumanyika SK, Murray DM, Klesges L, McClanahan B, Slawson D, Nunnally C, Rochon J, McLain-Allen B, Pree-Cary J. Child- and parent-targeted interventions: the Memphis GEMS pilot study. Ethn Dis. 2003 Winter;13(1 Suppl 1):S40-53.	1	12-week mean BMI chg	0	No effect	Relative	SSB		Usual	Usual		F	N & O
Berry DC, Schwartz TA, McMurray RG, Skelly AH, Neal M, Hall EG, Aimyong N, Amatuli DJ, Melkus G. The family partners for health study: a cluster randomized controlled trial for child and parent weight management. Nutr Diabetes. 2014 Jan 13;4:e101. doi: 10.1038/nutd.2013.42.	1	18-mo BMI %tile chg	0	No effect	Relative	SSB		Usual	Usual	M	F	O
Cunha DB, de Souza B, Pereira RA, Sichieri R. Effectiveness of a randomized school-based intervention involving families and teachers to prevent excessive weight gain among adolescents in Brazil. Plos One 2013; 8(2): e57498.	1	12-mo % overwt chg	0	No effect	Relative	SSB		Usual	Usual	M	F	N & O
Cunha DB, de Souza B, Pereira RA, Sichieri R. Effectiveness of a randomized school-based intervention involving families and teachers to prevent excessive weight gain among adolescents in Brazil. Plos One 2013; 8(2): e57498.	1	12-mo% obese chg	0	No effect	Relative	SSB		Usual	Usual	M	F	N & O
Campbell KJ, Lioret S, McNaughton SA, Crawford DA, Salmon J, Ball K, McCallum Z, Gerner BE, Spence AC, Cameron AJ, Hnatiuk JA, Ukoumunne OC, Gold L, Abbott G, Hesketh KD. A parent-focused intervention to reduce infant obesity risk behaviors: a randomized trial. Pediatrics. 2013 Apr;131(4):652-60. doi: 10.1542/peds.2012-2576. Epub 2013 Mar 4.	1	5-mo BMI-z chg	0	No effect	Relative	SSB & juice	Usual	Usual	Usual	M	F	N & O
Campbell KJ, Lioret S, McNaughton SA, Crawford DA, Salmon J, Ball K, McCallum Z, Gerner BE, Spence AC, Cameron AJ, Hnatiuk JA, Ukoumunne OC, Gold L, Abbott G, Hesketh KD. A parent-focused intervention to reduce infant obesity risk behaviors: a randomized trial. Pediatrics. 2013 Apr;131(4):652-60. doi: 10.1542/peds.2012-2576. Epub 2013 Mar 4.	1	16-mo BMI-z chg	0	No effect	Relative	SSB & juice	Usual	Usual	Usual	M	F	N & O
De Bock F, Breitenstein L, Fischer JE. Positive impact of a pre-school-based nutritional intervention on children's fruit and vegetable intake: results of a cluster-randomized trial. Public Health Nutr. 2012 Mar;15(3):466-75. doi: 10.1017/S136898001100200X. Epub 2011 Aug 23.	1	6-mo BMI chg	0	No effect	Relative	SSB & juice	Usual intake	Higher FV	Usual	M	F	N & O
De Bock F, Breitenstein L, Fischer JE. Positive impact of a pre-school-based nutritional intervention on children's fruit and vegetable intake: results of a cluster-randomized trial. Public Health Nutr. 2012 Mar;15(3):466-75. doi: 10.1017/S136898001100200X. Epub 2011 Aug 23.	1	6-mo % overwt chg	0	No effect	Relative	SSB & juice	Usual intake	Higher FV	Usual	M	F	N & O
De Bock F, Breitenstein L, Fischer JE. Positive impact of a pre-school-based nutritional intervention on children's fruit and vegetable intake: results of a cluster-randomized trial. Public Health Nutr. 2012 Mar;15(3):466-75. doi: 10.1017/S136898001100200X. Epub 2011 Aug 23.	1	12-mo BMI chg	0	No effect	Relative	SSB & juice	Usual intake	Higher FV	Usual	M	F	N & O
De Bock F, Breitenstein L, Fischer JE. Positive impact of a pre-school-based nutritional intervention on children's fruit and vegetable intake: results of a cluster-randomized trial. Public Health Nutr. 2012 Mar;15(3):466-75. doi: 10.1017/S136898001100200X. Epub 2011 Aug 23.	1	12-mo % overwt chg	0	No effect	Relative	SSB & juice	Usual intake	Higher FV	Usual	M	F	N & O
Taveras EM, Gortmaker SL, Hohman KH, Horan CM, Kleinman KP, Mitchell K, Price S, Prosser LA, Rifas-Shiman SL, Gillman MW. Randomized controlled trial to improve primary care to prevent and manage childhood obesity: the High Five for Kids study. Arch Pediatr Adolesc Med. 2011 Aug;165(8):714-22. doi: 10.1001/archpediatrics.2011.44. Epub 2011 Apr 4.	1	12-mo BMI chg	0	No effect	Relative	SSB		less fast food	Usual, less screen time	M	F	O
Taveras EM, Gortmaker SL, Hohman KH, Horan CM, Kleinman KP, Mitchell K, Price S, Prosser LA, Rifas-Shiman SL, Gillman MW. Randomized controlled trial to improve primary care to prevent and manage childhood obesity: the High Five for Kids study. Arch Pediatr Adolesc Med. 2011 Aug;165(8):714-22. doi: 10.1001/archpediatrics.2011.44. Epub 2011 Apr 4.	1	12-mo BMI z score	0	No effect	Relative	SSB		less fast food	Usual, less screen time	M	F	O
Taveras EM, Gortmaker SL, Hohman KH, Horan CM, Kleinman KP, Mitchell K, Price S, Prosser LA, Rifas-Shiman SL, Gillman MW. Randomized controlled trial to improve primary care to prevent and manage childhood obesity: the High Five for Kids study. Arch Pediatr Adolesc Med. 2011 Aug;165(8):714-22. doi: 10.1001/archpediatrics.2011.44. Epub 2011 Apr 4.	1	12-mo BMI chg	0	No effect	Relative	SSB		less fast food	Usual, less screen time	M		O
Taveras EM, Gortmaker SL, Hohman KH, Horan CM, Kleinman KP, Mitchell K, Price S, Prosser LA, Rifas-Shiman SL, Gillman MW. Randomized controlled trial to improve primary care to prevent and manage childhood obesity: the High Five for Kids study. Arch Pediatr Adolesc Med. 2011 Aug;165(8):714-22. doi: 10.1001/archpediatrics.2011.44. Epub 2011 Apr 4.	1	12-mo BMI chg	0	No effect	Relative	SSB		less fast food	Usual, less screen time	M	F	O
Taveras EM, Gortmaker SL, Hohman KH, Horan CM, Kleinman KP, Mitchell K, Price S, Prosser LA, Rifas-Shiman SL, Gillman MW. Randomized controlled trial to improve primary care to prevent and manage childhood obesity: the High Five for Kids study. Arch Pediatr Adolesc Med. 2011 Aug;165(8):714-22. doi: 10.1001/archpediatrics.2011.44. Epub 2011 Apr 4.	1	12-mo BMI chg	0	No effect	Relative	SSB		less fast food	Usual, less screen time	M	F	O
HEALTHY Study Group, Foster GD, Linder B, Baranowski T, Cooper DM, Goldberg L, Harrell JS, Kaufman F, Marcus MD, Treviño RP, Hirst K. A school-based intervention for diabetes risk reduction. N Engl J Med. 2010 Jul 29;363(5):443-53. doi: 10.1056/NEJMoa1001933. Epub 2010 Jun 27; Siega-Riz AM, El Ghormli L, Mobley C, Gillis B, Stadler D, Hartstein J, Volpe SL, Virus A, Bridgman J; HEALTHY Study Grou…	1	% overweight & obese	0	No effect	Relative	Caloric		Higher FV	Higher PA	M	F	N & O
HEALTHY Study Group, Foster GD, Linder B, Baranowski T, Cooper DM, Goldberg L, Harrell JS, Kaufman F, Marcus MD, Treviño RP, Hirst K. A school-based intervention for diabetes risk reduction. N Engl J Med. 2010 Jul 29;363(5):443-53. doi: 10.1056/NEJMoa1001933. Epub 2010 Jun 27; Siega-Riz AM, El Ghormli L, Mobley C, Gillis B, Stadler D, Hartstein J, Volpe SL, Virus A, Bridgman J; HEALTHY Study Grou…	1	BMI z score	0	No effect	Relative	Caloric		Higher FV	Higher PA	M	F	O
Branscum P, Sharma M Way LL, Wilson BRA, Rojas-Guyler L. A true challenge for any superhero, An Evaluation of a comic book obesity prevention program. Fam Comm Health 2013; 36(1):63-76.	1	3-mo BMI %tile chg	0	No effect	Relative	SSB		Higher FV	Higher PA	M	F	N & O
Haerens L, Deforche B, Maes L, Stevens V, Cardon G, De Bourdeaudhuij I. Body mass effects of a physical activity and healthy food intervention in middle schools. Obesity (Silver Spring). 2006 May;14(5):847-54.	1	1 year wt chg, kg boys	0	No effect	Relative & Absolute	SSB	1.5L/d	Higher FV	Higher PA	M		N & O
Haerens L, Deforche B, Maes L, Stevens V, Cardon G, De Bourdeaudhuij I. Body mass effects of a physical activity and healthy food intervention in middle schools. Obesity (Silver Spring). 2006 May;14(5):847-54.	1	1 year BMI chg, boys	0	No effect	Relative & Absolute	SSB	1.5L/d	Higher FV	Higher PA	M		N & O
Haerens L, Deforche B, Maes L, Stevens V, Cardon G, De Bourdeaudhuij I. Body mass effects of a physical activity and healthy food intervention in middle schools. Obesity (Silver Spring). 2006 May;14(5):847-54.	1	1 year BMI z chg, boys	0	No effect	Relative & Absolute	SSB	1.5L/d	Higher FV	Higher PA	M		N & O
Haerens L, Deforche B, Maes L, Stevens V, Cardon G, De Bourdeaudhuij I. Body mass effects of a physical activity and healthy food intervention in middle schools. Obesity (Silver Spring). 2006 May;14(5):847-54.	1	2 year wt chg kg, boys	0	No effect	Relative & Absolute	SSB	1.5L/d	Higher FV	Higher PA	M		N & O
Haerens L, Deforche B, Maes L, Stevens V, Cardon G, De Bourdeaudhuij I. Body mass effects of a physical activity and healthy food intervention in middle schools. Obesity (Silver Spring). 2006 May;14(5):847-54.	1	2 year BMI chg, boys	0	No effect	Relative & Absolute	SSB	1.5L/d	Higher FV	Higher PA	M		N & O
Haerens L, Deforche B, Maes L, Stevens V, Cardon G, De Bourdeaudhuij I. Body mass effects of a physical activity and healthy food intervention in middle schools. Obesity (Silver Spring). 2006 May;14(5):847-54.	1	2 year BMI z chg, boys	0	No effect	Relative & Absolute	SSB	1.5L/d	Higher FV	Higher PA	M		N & O
Haerens L, Deforche B, Maes L, Stevens V, Cardon G, De Bourdeaudhuij I. Body mass effects of a physical activity and healthy food intervention in middle schools. Obesity (Silver Spring). 2006 May;14(5):847-54.	1	1 year wt chg, kg boys	0	No effect	Relative & Absolute	SSB	1.5L/d	Higher FV	Higher PA	M		N & O
Haerens L, Deforche B, Maes L, Stevens V, Cardon G, De Bourdeaudhuij I. Body mass effects of a physical activity and healthy food intervention in middle schools. Obesity (Silver Spring). 2006 May;14(5):847-54.	1	1 year BMI chg, boys	0	No effect	Relative & Absolute	SSB	1.5L/d	Higher FV	Higher PA	M		N & O
Haerens L, Deforche B, Maes L, Stevens V, Cardon G, De Bourdeaudhuij I. Body mass effects of a physical activity and healthy food intervention in middle schools. Obesity (Silver Spring). 2006 May;14(5):847-54.	1	1 year BMI z chg, boys	0	No effect	Relative & Absolute	SSB	1.5L/d	Higher FV	Higher PA	M		N & O
Haerens L, Deforche B, Maes L, Stevens V, Cardon G, De Bourdeaudhuij I. Body mass effects of a physical activity and healthy food intervention in middle schools. Obesity (Silver Spring). 2006 May;14(5):847-54.	1	2 year wt chg kg, boys	0	No effect	Relative & Absolute	SSB	1.5L/d	Higher FV	Higher PA	M		N & O
Haerens L, Deforche B, Maes L, Stevens V, Cardon G, De Bourdeaudhuij I. Body mass effects of a physical activity and healthy food intervention in middle schools. Obesity (Silver Spring). 2006 May;14(5):847-54.	1	2 year BMI chg, boys	0	No effect	Relative & Absolute	SSB	1.5L/d	Higher FV	Higher PA	M		N & O
Haerens L, Deforche B, Maes L, Stevens V, Cardon G, De Bourdeaudhuij I. Body mass effects of a physical activity and healthy food intervention in middle schools. Obesity (Silver Spring). 2006 May;14(5):847-54.	1	2 year BMI z chg, boys	0	No effect	Relative & Absolute	SSB	1.5L/d	Higher FV	Higher PA	M		N & O
Haerens L, Deforche B, Maes L, Stevens V, Cardon G, De Bourdeaudhuij I. Body mass effects of a physical activity and healthy food intervention in middle schools. Obesity (Silver Spring). 2006 May;14(5):847-54.	1	1 year wt chg, kg girls	0	No effect	Relative & Absolute	SSB	1.5L/d	Higher FV	Higher PA		F	N & O
Haerens L, Deforche B, Maes L, Stevens V, Cardon G, De Bourdeaudhuij I. Body mass effects of a physical activity and healthy food intervention in middle schools. Obesity (Silver Spring). 2006 May;14(5):847-54.	1	1 year BMI chg, girls	0	No effect	Relative & Absolute	SSB	1.5L/d	Higher FV	Higher PA		F	N & O
Haerens L, Deforche B, Maes L, Stevens V, Cardon G, De Bourdeaudhuij I. Body mass effects of a physical activity and healthy food intervention in middle schools. Obesity (Silver Spring). 2006 May;14(5):847-54.	1	1 year BMI z chg, girls	0	No effect	Relative & Absolute	SSB	1.5L/d	Higher FV	Higher PA		F	N & O
Haerens L, Deforche B, Maes L, Stevens V, Cardon G, De Bourdeaudhuij I. Body mass effects of a physical activity and healthy food intervention in middle schools. Obesity (Silver Spring). 2006 May;14(5):847-54.	1	1 year wt chg, kg girls	0	No effect	Relative & Absolute	SSB	1.5L/d	Higher FV	Higher PA		F	N & O
Haerens L, Deforche B, Maes L, Stevens V, Cardon G, De Bourdeaudhuij I. Body mass effects of a physical activity and healthy food intervention in middle schools. Obesity (Silver Spring). 2006 May;14(5):847-54.	1	1 year BMI z chg, girls	0	No effect	Relative & Absolute	SSB	1.5L/d	Higher FV	Higher PA		F	N & O
Haerens L, Deforche B, Maes L, Stevens V, Cardon G, De Bourdeaudhuij I. Body mass effects of a physical activity and healthy food intervention in middle schools. Obesity (Silver Spring). 2006 May;14(5):847-54.	1	1 year BMI chg, girls	0	No effect	Relative & Absolute	SSB	1.5L/d	Higher FV	Higher PA		F	N & O
Haerens L, Deforche B, Maes L, Stevens V, Cardon G, De Bourdeaudhuij I. Body mass effects of a physical activity and healthy food intervention in middle schools. Obesity (Silver Spring). 2006 May;14(5):847-54.	1	2 year wt chg, kg girls	0	No effect	Relative & Absolute	SSB	1.5L/d	Higher FV	Higher PA		F	N & O
Haerens L, Deforche B, Maes L, Stevens V, Cardon G, De Bourdeaudhuij I. Body mass effects of a physical activity and healthy food intervention in middle schools. Obesity (Silver Spring). 2006 May;14(5):847-54.	1	2 year wt chg, kg girls	0	No effect	Relative & Absolute	SSB	1.5L/d	Higher FV	Higher PA		F	N & O
Haerens L, Deforche B, Maes L, Stevens V, Cardon G, De Bourdeaudhuij I. Body mass effects of a physical activity and healthy food intervention in middle schools. Obesity (Silver Spring). 2006 May;14(5):847-54.	1	2 year BMI chg, girls	0	No effect	Relative & Absolute	SSB	1.5L/d	Higher FV	Higher PA		F	N & O
Haerens L, Deforche B, Maes L, Stevens V, Cardon G, De Bourdeaudhuij I. Body mass effects of a physical activity and healthy food intervention in middle schools. Obesity (Silver Spring). 2006 May;14(5):847-54.	1	2 year BMI z chg, girls	0	No effect	Relative & Absolute	SSB	1.5L/d	Higher FV	Higher PA		F	N & O
Shamah Levy T, Morales Ruán C, Amaya Castellanos C, Salazar Coronel A, Jiménez Aguilar A, Méndez Gómez Humarán I. Effectiveness of a diet and physical activity promotion strategy on the prevention of obesity in Mexican school children. BMC Public Health. 2012 Mar 1;12:152. doi: 10.1186/1471-2458-12-152.	1	6-mo % overweight chg	0	Less gain	Absolute	Less volume	Usual	Higher FV	Usual	M		N & O
Shamah Levy T, Morales Ruán C, Amaya Castellanos C, Salazar Coronel A, Jiménez Aguilar A, Méndez Gómez Humarán I. Effectiveness of a diet and physical activity promotion strategy on the prevention of obesity in Mexican school children. BMC Public Health. 2012 Mar 1;12:152. doi: 10.1186/1471-2458-12-152.	1	6-mo % obese chg	0	Less gain	Absolute	Less volume	Usual	Higher FV	Usual	M		N & O
Shamah Levy T, Morales Ruán C, Amaya Castellanos C, Salazar Coronel A, Jiménez Aguilar A, Méndez Gómez Humarán I. Effectiveness of a diet and physical activity promotion strategy on the prevention of obesity in Mexican school children. BMC Public Health. 2012 Mar 1;12:152. doi: 10.1186/1471-2458-12-152.	1	6-mo % overweight chg	0	Less gain	Absolute	Less volume	Usual	Higher FV	Usual		F	N & O
Shamah Levy T, Morales Ruán C, Amaya Castellanos C, Salazar Coronel A, Jiménez Aguilar A, Méndez Gómez Humarán I. Effectiveness of a diet and physical activity promotion strategy on the prevention of obesity in Mexican school children. BMC Public Health. 2012 Mar 1;12:152. doi: 10.1186/1471-2458-12-152.	1	6-mo % obese chg	0	Less gain	Absolute	Less volume	Usual	Higher FV	Usual		F	N & O
Rosário R, Oliveira B, Araújo A, Lopes O, Padrão P, Moreira A, Teixeira V, Barros R, Pereira B, Moreira P. The impact of an intervention taught by trained teachers on childhood overweight. Int J Environ Res Public Health. 2012 Apr;9(4):1355-67. doi: 10.3390/ijerph9041355. Epub 2012 Apr 16.	1	6-mo BMI z score chg	0	Less gain	Relative	SSB	Usual	Usual	Usual	M	F	N & O
Rosário R, Oliveira B, Araújo A, Lopes O, Padrão P, Moreira A, Teixeira V, Barros R, Pereira B, Moreira P. The impact of an intervention taught by trained teachers on childhood overweight. Int J Environ Res Public Health. 2012 Apr;9(4):1355-67. doi: 10.3390/ijerph9041355. Epub 2012 Apr 16.	1	6-mo incident overwt	0	Less gain	Relative	SSB	Usual	Usual	Usual	M	F	N & O
Veitch J, Singh A, van Stralen MM, van Mechelen W, Brug J, Chinapaw MJ.Reduction in sugar-sweetened beverages is not associated with more water or diet drinks. Public Health Nutr. 2011 Aug;14(8):1388-93. doi: 10.1017/S1368980010002727. Epub 2010 Oct 29; Singh AS, Chin A Paw MJ, Kremers SP, Visscher TL, Brug J, van Mechelen W. Design of the Dutch Obesity Intervention in Teenagers (NRG-DOiT): syste…	1	8-mo BMI chg	0	Less gain	Relative	SSB	Usual	Usual	Usual	M	F	N & O
Taveras EM, Gortmaker SL, Hohman KH, Horan CM, Kleinman KP, Mitchell K, Price S, Prosser LA, Rifas-Shiman SL, Gillman MW. Randomized controlled trial to improve primary care to prevent and manage childhood obesity: the High Five for Kids study. Arch Pediatr Adolesc Med. 2011 Aug;165(8):714-22. doi: 10.1001/archpediatrics.2011.44. Epub 2011 Apr 4.	1	12-mo BMI chg	0	Less gain	Relative	SSB		Usual, less fast food	Usual, less screen time		F	O
HEALTHY Study Group, Foster GD, Linder B, Baranowski T, Cooper DM, Goldberg L, Harrell JS, Kaufman F, Marcus MD, Treviño RP, Hirst K. A school-based intervention for diabetes risk reduction. N Engl J Med. 2010 Jul 29;363(5):443-53. doi: 10.1056/NEJMoa1001933. Epub 2010 Jun 27; Siega-Riz AM, El Ghormli L, Mobley C, Gillis B, Stadler D, Hartstein J, Volpe SL, Virus A, Bridgman J; HEALTHY Study Grou…	1	BMI z score	0	Less gain	Relative	Caloric	Usual	Higher FV	Higher PA	M	F	N & O
HEALTHY Study Group, Foster GD, Linder B, Baranowski T, Cooper DM, Goldberg L, Harrell JS, Kaufman F, Marcus MD, Treviño RP, Hirst K. A school-based intervention for diabetes risk reduction. N Engl J Med. 2010 Jul 29;363(5):443-53. doi: 10.1056/NEJMoa1001933. Epub 2010 Jun 27; Siega-Riz AM, El Ghormli L, Mobley C, Gillis B, Stadler D, Hartstein J, Volpe SL, Virus A, Bridgman J; HEALTHY Study Grou…	1	% obesity	0	Less gain	Relative	Caloric	Usual	Higher FV	Higher PA	M	F	O
Berry DC, Schwartz TA, McMurray RG, Skelly AH, Neal M, Hall EG, Aimyong N, Amatuli DJ, Melkus G. The family partners for health study: a cluster randomized controlled trial for child and parent weight management. Nutr Diabetes. 2014 Jan 13;4:e101. doi: 10.1038/nutd.2013.42.	1	18-mo BMI chg	0	Less gain	Relative & Absolute	Caloric (Soda, sweet drinks & full fat milk)	1L/d or 4 glasses targeted	Usual	Usual	M	F	O
Haerens L, Deforche B, Maes L, Stevens V, Cardon G, De Bourdeaudhuij I. Body mass effects of a physical activity and healthy food intervention in middle schools. Obesity (Silver Spring). 2006 May;14(5):847-54.	1	2 year wt chg, kg girls	0	Less gain	Relative & Absolute	SSB	1.5L/d	Higher FV	Higher PA		F	N & O
Haerens L, Deforche B, Maes L, Stevens V, Cardon G, De Bourdeaudhuij I. Body mass effects of a physical activity and healthy food intervention in middle schools. Obesity (Silver Spring). 2006 May;14(5):847-54.	1	2 year BMI chg, girls	0	Less gain	Relative & Absolute	SSB	1.5L/d	Higher FV	Higher PA		F	N & O
Haerens L, Deforche B, Maes L, Stevens V, Cardon G, De Bourdeaudhuij I. Body mass effects of a physical activity and healthy food intervention in middle schools. Obesity (Silver Spring). 2006 May;14(5):847-54.	1	2 year BMI z chg, girls	0	Less gain	Relative & Absolute	SSB	1.5L/d	Higher FV	Higher PA		F	N & O
Rosário R, Oliveira B, Araújo A, Lopes O, Padrão P, Moreira A, Teixeira V, Barros R, Pereira B, Moreira P. The impact of an intervention taught by trained teachers on childhood overweight. Int J Environ Res Public Health. 2012 Apr;9(4):1355-67. doi: 10.3390/ijerph9041355. Epub 2012 Apr 16.	1	6-mo overwt remission, back to normal wt	0	More loss	Relative	SSB	Usual	Usual	Usual	M	F	O
Verbestel V, De Coen V, Van Winckel M, Huybrechts I, Maes L, De Bourdeaudhuij I. Prevention of overweight in children younger than 2 years old: a pilot cluster-randomized controlled trial. Public Health Nutr. 2014 Jun;17(6):1384-92. doi: 10.1017/S1368980013001353. Epub 2013 May 23.	1	12-mo BMI z score	0	More loss	Relative	SSB	No intervention	more milk, fruit, vrg	increase	M	F	N & O
Mousavi A, Vafa M, Neyestani T, Khamseh M, Hoseini F. The effects of green tea consumption on metabolic and anthropometric indices in patients with Type 2 diabetes. J Res Med Sci. 2013 Dec;18(12):1080-6.	0	2-mo kg	1	No effect	Absolute	Less vol	2 cups			M	F	O
Mousavi A, Vafa M, Neyestani T, Khamseh M, Hoseini F. The effects of green tea consumption on metabolic and anthropometric indices in patients with Type 2 diabetes. J Res Med Sci. 2013 Dec;18(12):1080-6.	0	2-mo BMI	1	No effect	Absolute	Less vol	2 cups			M	F	O
Mousavi A, Vafa M, Neyestani T, Khamseh M, Hoseini F. The effects of green tea consumption on metabolic and anthropometric indices in patients with Type 2 diabetes. J Res Med Sci. 2013 Dec;18(12):1080-6.	0	2-mo kg	1	No effect	Absolute	Less vol	2 cups			M	F	O, Type II D
Mousavi A, Vafa M, Neyestani T, Khamseh M, Hoseini F. The effects of green tea consumption on metabolic and anthropometric indices in patients with Type 2 diabetes. J Res Med Sci. 2013 Dec;18(12):1080-6.	0	2-mo BMI	1	No effect	Absolute	Less vol	2 cups			M	F	O, Type II D
Reid M, Hammersley R, Hill AJ, Skidmore P. Long-term dietary compensation for added sugar: effects of supplementary sucrose drinks over a 4-week period. Br J Nutr. 2007 Jan;97(1):193-203.	0	4-week BMI	1	No effect	Relative	Cola	1L	Restricted fat	120min/d		F	N
De Ruyter et al 2012	0	18-mo BMIz score	1	Less gain	Relative	SSB	8oz (250ml)	Usual	water matched for color, flavor, sweetness	M	F	N & O
De Ruyter et al 2012	0	18-mo kg fat mass	1	Less gain	Relative	SSB	8oz (250ml)	Usual	water matched for color, flavor, sweetness	M	F	N & O
De Ruyter et al 2012	0	18-mo kg wt	1	Less gain	Relative	SSB	8oz (250ml)	Usual	water matched for color, flavor, sweetness	M	F	N & O
De Ruyter et al 2012	0	18-mo BMIz score	1	Less gain	Relative	SSB	8oz (250ml)	Usual	water matched for color, flavor, sweetness	M	F	N & O
de Ruyter JC, Olthof MR, Kuijper LD, Katan MB. Effect of sugar-sweetened beverages on body weight in children: design and baseline characteristics of the Double-blind, Randomized INtervention study in Kids. Contemp Clin Trials. 2012 Jan;33(1):247-57. doi: 10.1016/j.cct.2011.10.007. Epub 2011 Oct 25.	0	18-mo kg fat mass	1	Less gain	Relative	SSB	8oz (250ml)	Usual	water matched for color, flavor, sweetness	M	F	N & O
de Ruyter JC, Olthof MR, Kuijper LD, Katan MB. Effect of sugar-sweetened beverages on body weight in children: design and baseline characteristics of the Double-blind, Randomized INtervention study in Kids. Contemp Clin Trials. 2012 Jan;33(1):247-57. doi: 10.1016/j.cct.2011.10.007. Epub 2011 Oct 25.	0	18-mo kg wt	1	Less gain	Relative	SSB	8oz (250ml)	Usual	water matched for color, flavor, sweetness	M	F	N & O
Mousavi A, Vafa M, Neyestani T, Khamseh M, Hoseini F. The effects of green tea consumption on metabolic and anthropometric indices in patients with Type 2 diabetes. J Res Med Sci. 2013 Dec;18(12):1080-6.	0	2-mo kg	1	More loss	Absolute	Less vol	4 cups			M	F	O, Type II D
Mousavi A, Vafa M, Neyestani T, Khamseh M, Hoseini F. The effects of green tea consumption on metabolic and anthropometric indices in patients with Type 2 diabetes. J Res Med Sci. 2013 Dec;18(12):1080-6.	0	2-mo BMI	1	More loss	Absolute	Less vol	4 cups			M	F	O, Type II D
Ezendam NP, Brug J, Oenema A. Evaluation of the Web-based computer-tailored FATaintPHAT intervention to promote energy balance among adolescents: results from a school cluster randomized trial. Arch Pediatr Adolesc Med. 2012 Mar;166(3):248-55. doi: 10.1001/archpediatrics.2011.204. Epub 2011 Nov 7.	0	2-year BMI chg	0	No effect	Relative	SSB	0.4L	Higher FV	Restricteder PA	M	F	N & O
Ezendam NP, Brug J, Oenema A. Evaluation of the Web-based computer-tailored FATaintPHAT intervention to promote energy balance among adolescents: results from a school cluster randomized trial.Arch Pediatr Adolesc Med. 2012 Mar;166(3):248-55. doi: 10.1001/archpediatrics.2011.204. Epub 2011 Nov 7.	0	2-year BMI chg	0	No effect	Relative	SSB	0.4L	Higher FV	Restricteder PA	M	F	N & O
Ezendam NP, Brug J, Oenema A. Evaluation of the Web-based computer-tailored FATaintPHAT intervention to promote energy balance among adolescents: results from a school cluster randomized trial.Arch Pediatr Adolesc Med. 2012 Mar;166(3):248-55. doi: 10.1001/archpediatrics.2011.204. Epub 2011 Nov 7.	0	2-year % overwt chg	0	No effect	Relative	SSB	0.4L	Higher FV	Restricteder PA	M	F	N & O
Ezendam NP, Brug J, Oenema A. Evaluation of the Web-based computer-tailored FATaintPHAT intervention to promote energy balance among adolescents: results from a school cluster randomized trial.Arch Pediatr Adolesc Med. 2012 Mar;166(3):248-55. doi: 10.1001/archpediatrics.2011.204. Epub 2011 Nov 7.	0	2-year % overwt chg	0	No effect	Relative	SSB	0.4L	Higher FV	Restricteder PA	M	F	N & O
